# Supplementary material for: Histological and transcriptomic insights into the interaction between grapevine and Colletotrichum viniferum
Source: Frontiers journal article supplement (doi:10.3389/fpls.2024.1446288), 2024-08-16
Supplement: Table_1.xlsx [file Table_1.xlsx]

## Sheet: TableS22
Table S22. Differentially expressed genes (DEGs) of C.viniferum at 48 hpi after infection
Gene ID	log2FoldChange	Chr	Gene start	Gene end	Gene strand	Gene length	Function	TF family
A14352	-5.94912	Contig9	596293	597135	-	729	-	-
A03175	-4.67195	Contig19	96844	98382	-	1539	-	-
A06720	-6.26125	Contig2	535493	538892	+	3300	D4B5F9.2 RecName: Full=Probable peptidoglycan-N-acetylglucosamine deacetylase ARB_03699; Short=Peptidoglycan GlcNAc deacetylase; AltName: Full=Peptidoglycan N-deacetylase; Short=PG N-deacetylase; Flags: Precursor && PF01522:Polysaccharide deacetylase|PF00187:Chitin recognition protein	Polysacc_deac_1
A10150	-5.87899	Contig48	304453	305754	-	1302	G2Q9T3.1 RecName: Full=Polysaccharide monooxygenase Cel61a; AltName: Full=Cellulase-61a; Short=Cel61a; AltName: Full=Endoglucanase-61a; AltName: Full=Glycoside hydrolase-61; Short=GH-61; Flags: Precursor && PF03443:Glycosyl hydrolase family 61|PF00734:Fungal cellulose binding domain	-
A03252	-5.51967	Contig19	376583	378020	-	1344	-	-
A03889	-6.51337	Contig1	809804	811405	+	1602	P14943.2 RecName: Full=Liver carboxylesterase 2 && PF00135:Carboxylesterase family	COesterase
A10812	-5.33511	Contig4	3236299	3241169	+	1968	D4AZ78.1 RecName: Full=Secreted lipase ARB_01498; Flags: Precursor && PF00135:Carboxylesterase family	COesterase
A01169	-4.9188	Contig12	378497	381400	+	2904	PF13857:Ankyrin repeats (many copies)|PF12796:Ankyrin repeats (3 copies)	-
A06450	-6.87917	Contig29	264042	264694	-	597	PF05730:CFEM domain	-
A11247	-6.79785	Contig53	126309	128075	+	1653	PF05141:Pyoverdine/dityrosine biosynthesis protein	-
A06399	-6.26601	Contig28	761730	762440	+	711	-	-
A07948	-5.5014	Contig30	407345	408474	+	1074	PF00199:Catalase	Catalase
A02566	-4.79292	Contig16	1249408	1251517	-	1866	Q8VHG0.3 RecName: Full=Dimethylaniline monooxygenase [N-oxide-forming] 4; AltName: Full=Dimethylaniline oxidase 4; AltName: Full=Hepatic flavin-containing monooxygenase 4; Short=FMO 4 && PF00743:Flavin-binding monooxygenase-like	FMO-like
A07397	-8.32937	Contig2	57038	58918	-	1812	P56742.2 RecName: Full=L-amino-acid oxidase; Short=LAAO; Short=LAO; AltName: Full=Apoxin I; AltName: Full=Apoxin-1; Flags: Precursor >F8S0Z5.1 RecName: Full=L-amino-acid oxidase; Short=LAAO; Short=LAO; Flags: Precursor && PF01593:Flavin containing amine oxidoreductase	Amino_oxidase
A09594	-6.09753	Contig3	4294805	4296947	-	1974	P39992.1 RecName: Full=Uncharacterized protein YEL023C && PF09994:Uncharacterized alpha/beta hydrolase domain (DUF2235)	-
A04186	-9.362	Contig1	194799	196052	+	1254	-	-
A04713	-5.76482	Contig1	4092151	4094674	+	2352	P78746.1 RecName: Full=Chitin synthase D; AltName: Full=Chitin-UDP acetyl-glucosaminyl transferase D; AltName: Full=Class-VI chitin synthase D && PF13641:Glycosyltransferase like family 2	-
A08200	-6.07166	Contig32	490996	494899	-	2172	E3QKH9.1 RecName: Full=Extracellular metalloprotease GLRG_06511; Flags: Precursor && PF05572:Pregnancy-associated plasma protein-A	-
A00940	-6.99199	Contig12	1129481	1130003	-	462	PF05730:CFEM domain	-
A03409	-7.11511	Contig19	913271	914746	-	1416	PF07350:Protein of unknown function (DUF1479)	-
A10697	-8.64846	Contig4	2816611	2817687	+	1077	-	-
A05877	-5.84078	Contig25	769307	771021	+	1512	Q54H55.1 RecName: Full=FAD-linked oxidoreductase DDB_G0289697 && PF01565:FAD binding domain|PF08031:Berberine and berberine like	FAD_binding_4
A07857	-9.36365	Contig30	54114	55332	-	1110	E3QWD3.1 RecName: Full=Neutral protease 2 homolog MGG_10927; AltName: Full=Deuterolysin MGG_10927; Flags: Precursor && PF02102:Deuterolysin metalloprotease (M35) family	-
A11258	-6.68276	Contig53	175727	177096	-	1209	-	-
A01227	-6.69733	Contig12	630558	633193	+	1668	-	-
A10258	-5.36531	Contig4	874303	875999	+	1536	D7PI16.1 RecName: Full=O-methyltransferase gsfB; AltName: Full=Griseofulvin synthesis protein B && PF00891:O-methyltransferase	-
A04050	-7.18147	Contig1	1464212	1466027	+	1758	Q12609.3 RecName: Full=Probable sterigmatocystin biosynthesis P450 monooxygenase stcF; AltName: Full=Cytochrome P450 60A2 && PF00067:Cytochrome P450	p450
A05899	-7.068	Contig26	60281	63610	-	1380	Q9ZG90.1 RecName: Full=Keratan-sulfate endo-1,4-beta-galactosidase; AltName: Full=Endo-beta-galactosidase; Flags: Precursor && PF00722:Glycosyl hydrolases family 16	-
A09709	-7.16194	Contig41	68151	68642	-	492	-	-
A02914	-6.28318	Contig18	648934	649960	+	969	Q9P6N2.1 RecName: Full=Pdp3-interacting factor 1 && PF12710:haloacid dehalogenase-like hydrolase	-
A14017	-5.65078	Contig8	2399431	2399733	+	303	-	-
A12851	-8.21554	Contig6	37005	38293	-	1053	-	-
A11421	-5.777	Contig57	132202	138367	+	2145	B3EWZ8.1 RecName: Full=Ectin; Flags: Precursor && PF00067:Cytochrome P450|PF00188:Cysteine-rich secretory protein family	SCP
A07697	-6.63106	Contig2	445829	447181	-	1197	PF02182:SAD/SRA domain	-
A07233	-4.52733	Contig2	2222396	2226893	-	2082	O74544.1 RecName: Full=GTP-binding protein gtr2 && PF04670:Gtr1/RagA G protein conserved region|PF01187:Macrophage migration inhibitory factor (MIF)	MIF
A05235	-4.87921	Contig22	457162	458538	-	1377	-	-
A01356	-7.35824	Contig13	830768	832409	+	1476	PF05730:CFEM domain	-
A01659	-5.75209	Contig14	56516	58702	+	2187	P31907.2 RecName: Full=Hydrogenase maturation factor HoxX && PF02911:Formyl transferase, C-terminal domain|PF00378:Enoyl-CoA hydratase/isomerase	ECH
A02603	-8.02667	Contig17	119565	121024	+	1338	-	-
A07716	-6.03376	Contig2	4260856	4261947	-	1035	Q9UTR6.2 RecName: Full=Initiation-specific alpha-1,6-mannosyltransferase && PF04488:Glycosyltransferase sugar-binding region containing DXD motif	Gly_transf_sug
A06652	-5.58806	Contig2	5030318	5030923	-	606	PF12296:Hydrophobic surface binding protein A	-
A07833	-6.56909	Contig2	4695791	4696914	-	966	C8ZI10.1 RecName: Full=Sphingoid long-chain base transporter RSB1 && PF04479:RTA1 like protein	RTA1
A00433	-8.9312	Contig11	30060	33830	-	1962	S0EEY7.1 RecName: Full=Efflux pump FUS6; AltName: Full=Fusarin biosynthesis protein 6 && PF00067:Cytochrome P450|PF07690:Major Facilitator Superfamily	MFS_1
A06931	-6.05782	Contig2	87888	90496	+	2466	-	-
A05113	-5.93896	Contig21	635721	637113	-	1245	-	-
A02959	-6.54457	Contig18	848690	850259	-	1392	D4AUF4.1 RecName: Full=WSC domain-containing protein ARB_07870; Flags: Precursor && PF09362:Domain of unknown function (DUF1996)|PF01822:WSC domain	-
A09433	-4.52623	Contig3	3384404	3386277	-	1665	S0EEY7.1 RecName: Full=Efflux pump FUS6; AltName: Full=Fusarin biosynthesis protein 6 && PF07690:Major Facilitator Superfamily	MFS_1
A14114	-5.34817	Contig8	543461	544935	+	1419	-	-
A01226	-5.85495	Contig12	628509	629980	-	1347	-	-
A07217	-5.61483	Contig2	2166657	2169517	-	2754	PF13632:Glycosyl transferase family group 2	-
A14037	-7.33707	Contig8	2460503	2461776	-	1203	-	-
A01218	-7.10831	Contig12	568514	569348	+	783	PF00722:Glycosyl hydrolases family 16	-
A03942	-5.43061	Contig1	111734	116539	-	3201	D4AZ78.1 RecName: Full=Secreted lipase ARB_01498; Flags: Precursor && PF00135:Carboxylesterase family	COesterase
A04569	-8.421	Contig1	3365338	3367308	-	1791	P58780.1 RecName: Full=Adenosine deaminase CECR1; AltName: Full=Cat eye syndrome critical region protein 1; Flags: Precursor && PF00962:Adenosine/AMP deaminase	-
novel.1044	-5.39541	Contig5	2897453	2899527	-	1954	-	-
A06957	-5.03261	Contig2	1164818	1166113	-	1242	-	-
A12566	-6.82212	Contig6	1308683	1310227	+	1029	PF05730:CFEM domain	-
A13378	-7.1673	Contig7	1825014	1825664	+	651	-	-
A12901	-4.93463	Contig6	203613	205184	+	1374	-	-
A09460	-4.75492	Contig3	3670117	3672569	+	2343	Q9ST27.1 RecName: Full=Phototropin-2; AltName: Full=Non-phototropic hypocotyl protein 1B; Short=OsNPH1B && PF13426:PAS domain	-
A14089	-5.11523	Contig8	451589	452788	-	993	B1WB06.1 RecName: Full=Methyltransferase-like protein 24; Flags: Precursor && PF13383:Methyltransferase domain	-
A02551	-6.82868	Contig16	1219068	1220756	+	1218	PF05730:CFEM domain	-
A01167	-5.86646	Contig12	367983	369174	-	924	-	-
A11245	-8.23559	Contig53	113549	115635	-	1839	Q0CCX6.1 RecName: Full=Dihydrogeodin oxidase; Short=DHGO; AltName: Full=Geodin synthesis protein J; Flags: Precursor && PF07732:Multicopper oxidase|PF07731:Multicopper oxidase|PF00394:Multicopper oxidase	-
A09157	-5.85597	Contig3	2075334	2078274	+	1707	Q8K2T1.1 RecName: Full=NmrA-like family domain-containing protein 1 && PF05368:NmrA-like family	NmrA
A04044	-6.83162	Contig1	1411367	1413032	-	1374	PF05730:CFEM domain	-
A03738	-6.49285	Contig1	6036302	6037500	+	720	-	-
A04378	-6.01044	Contig1	2631150	2632577	+	1428	-	-
A12010	-6.90414	Contig5	2198228	2198641	-	414	-	-
A07530	-7.08323	Contig2	3492079	3493157	+	828	-	-
A11682	-4.35011	Contig5	984886	986717	-	810	Q58DM8.1 RecName: Full=Enoyl-CoA hydratase, mitochondrial; AltName: Full=Enoyl-CoA hydratase 1; AltName: Full=Short-chain enoyl-CoA hydratase; Short=SCEH; Flags: Precursor && PF00378:Enoyl-CoA hydratase/isomerase	ECH
A14255	-6.31159	Contig9	263517	264503	-	987	-	-
A11246	-7.53135	Contig53	116948	118427	-	1422	P53918.1 RecName: Full=Uncharacterized transporter ESBP6 && PF07690:Major Facilitator Superfamily	MFS_1
A11683	-5.11188	Contig5	987296	990579	+	2859	Q70LM4.1 RecName: Full=Linear gramicidin synthase subunit D; Includes: RecName: Full=ATP-dependent D-leucine adenylase; Short=D-LeuA; AltName: Full=D-leucine activase; Includes: RecName: Full=Leucine racemase [ATP-hydrolyzing]; Includes: RecName: Full=ATP-dependent tryptophan adenylase; Short=TrpA; AltName: Full=Tryptophan activase; Includes: RecName: Full=ATP-dependent glycine adenylase; Short=G…	AMP-binding
A12795	-4.77981	Contig6	2595650	2600581	+	2472	PF11951:Fungal specific transcription factor domain	-
A00073	-4.88497	Contig10	953179	954231	-	993	-	-
A14090	-4.79148	Contig8	453644	454667	-	900	Q9AJU2.1 RecName: Full=8-demethyl-8-alpha-L-rhamnosyl tetracenomycin-C 2'-O-methyltransferase; AltName: Full=O-methyltransferase I && -	-
A07947	-4.50706	Contig30	403298	405490	-	2037	PF00305:Lipoxygenase	Lipoxygenase
A01056	-4.85578	Contig12	1547005	1548041	-	987	P47001.1 RecName: Full=Cell wall mannoprotein CIS3; AltName: Full=Covalently-linked cell wall protein 5/11; AltName: Full=Protein with internal repeats 4; AltName: Full=Soluble cell wall protein 8; Flags: Precursor && -	-
A02016	-5.28608	Contig15	1310031	1314577	-	1470	-	-
A02743	-5.14029	Contig17	723901	725472	-	1479	PF01565:FAD binding domain	FAD_binding_4
A11588	-8.09641	Contig5	639003	640323	-	1074	-	-
A04038	-4.64706	Contig1	1386752	1390810	-	2361	-	-
A02571	-4.22539	Contig16	1267084	1269323	+	2172	Q76I22.2 RecName: Full=Linoleate 9S-lipoxygenase 1; AltName: Full=9-lipoxygenase; AltName: Full=Lipoxygenase 1; AltName: Full=r9-LOX1 && PF00305:Lipoxygenase	Lipoxygenase
A07817	-6.21318	Contig2	4581768	4582619	+	795	-	-
A00781	-5.87842	Contig11	1519442	1521293	-	1683	PF11374:Protein of unknown function (DUF3176)	-
A14310	-6.62537	Contig9	461451	462123	-	537	-	-
A02436	-5.55946	Contig16	612669	614088	+	1248	B8N8R1.1 RecName: Full=O-methyltransferase afvC; AltName: Full=Aflavarin synthesis protein C && PF00891:O-methyltransferase	-
A11021	-4.66262	Contig4	4042806	4044324	-	1467	Q8N0N3.1 RecName: Full=Beta-1,3-glucan-binding protein; Short=GBP; Flags: Precursor && PF00722:Glycosyl hydrolases family 16	-
A14443	-4.58406	Contig9	995189	996944	+	1704	PF01757:Acyltransferase family	-
novel.106	-6.37033	Contig1	5509772	5512196	-	2020	-	-
A04577	-4.9552	Contig1	3394872	3397265	+	2229	PF12757:Protein of unknown function (DUF3812)	-
A03070	-7.36658	Contig18	28963	30548	-	1425	Q9Y7S4.1 RecName: Full=Uncharacterized transporter C569.05c && PF07690:Major Facilitator Superfamily	MFS_1
A00373	-4.22039	Contig10	316641	319466	-	1815	Q6P0E1.1 RecName: Full=Transcription factor Sox-2 && PF00505:HMG (high mobility group) box|PF10270:Membrane magnesium transporter	HMG_box
A06815	-4.71146	Contig2	5684804	5714186	-	29280	PF05792:Candida agglutinin-like (ALS)	-
A05394	-6.0234	Contig22	108485	110247	-	1395	PF05730:CFEM domain	-
A04763	-7.37586	Contig1	434707	435261	+	555	-	-
A00434	-9.49863	Contig11	35457	36365	+	909	PF05705:Eukaryotic protein of unknown function (DUF829)	-
A14411	-8.12883	Contig9	853416	853984	-	453	-	-
A11466	-4.26212	Contig58	71453	74350	+	2706	P46954.1 RecName: Full=Protein SIP4 && PF04082:Fungal specific transcription factor domain|PF00172:Fungal Zn(2)-Cys(6) binuclear cluster domain	Fungal_trans
A02435	-4.67117	Contig16	609680	610991	-	1107	M2SNN6.1 RecName: Full=Secondary metabolism regulator LAE1; AltName: Full=Methyltransferase LAE1; AltName: Full=Velvet complex subunit LAE1 && PF13489:Methyltransferase domain	-
A12156	-5.31809	Contig5	2909842	2911587	+	1701	Q9DBW0.1 RecName: Full=Cytochrome P450 4V2; AltName: Full=Docosahexaenoic acid omega-hydroxylase CYP4V2 && PF00067:Cytochrome P450	p450
A13865	-4.01551	Contig8	1799681	1804164	+	4284	Q5A599.2 RecName: Full=Histidine protein kinase NIK1 && PF02518:Histidine kinase-, DNA gyrase B-, and HSP90-like ATPase|PF00512:His Kinase A (phospho-acceptor) domain|PF00072:Response regulator receiver domain|PF08447:PAS fold	HATPase_c
A14304	-6.05434	Contig9	443582	445858	+	2013	D4AUF1.1 RecName: Full=WSC domain-containing protein ARB_07867; Flags: Precursor && PF01822:WSC domain	-
A06607	-4.00335	Contig2	4742469	4747576	-	4047	Q9XIG1.1 RecName: Full=Sterol 3-beta-glucosyltransferase UGT80B1; AltName: Full=Protein TRANSPARENT TESTA 15; AltName: Full=UDP-glucose:sterol glucosyltransferase 80B1 && PF07690:Major Facilitator Superfamily|PF03033:Glycosyltransferase family 28 N-terminal domain	MFS_1
A01446	-5.64306	Contig13	104542	106414	+	1767	-	-
A13901	-4.53609	Contig8	1985076	1986281	-	1038	-	-
A13310	-4.48754	Contig7	1543335	1545374	-	1896	B6HJU0.1 RecName: Full=Efflux pump roqT; AltName: Full=Roquefortine/meleagrin synthesis protein T && PF07690:Major Facilitator Superfamily	MFS_1
A10916	-6.64957	Contig4	3707839	3709584	-	1746	PF00024:PAN domain	PAN_1
A08978	-4.49443	Contig3	1173024	1175291	-	1494	Q12361.1 RecName: Full=G protein-coupled receptor GPR1 && PF11970:G protein-coupled glucose receptor regulating Gpa2 C-term|PF11710:G protein-coupled glucose receptor regulating Gpa2	-
A01425	-5.54765	Contig13	1165660	1167783	+	2124	I1S0E2.2 RecName: Full=Developmental regulatory protein wetA && -	-
A07765	-9.7624	Contig2	4394799	4396548	-	1596	O35132.2 RecName: Full=25-hydroxyvitamin D-1 alpha hydroxylase, mitochondrial; AltName: Full=25-OHD-1 alpha-hydroxylase; AltName: Full=25-hydroxyvitamin D(3) 1-alpha-hydroxylase; Short=VD3 1A hydroxylase; AltName: Full=Calcidiol 1-monooxygenase; AltName: Full=Cytochrome P450 subfamily XXVIIB polypeptide 1; AltName: Full=Cytochrome P450C1 alpha; AltName: Full=Cytochrome P450VD1-alpha; AltName: Ful…	p450
A06989	-4.61714	Contig2	1253521	1255856	+	2205	PF13854:Kelch motif	-
A05008	-6.79575	Contig21	136456	136956	+	501	-	-
A09449	-4.16425	Contig3	3617731	3618609	+	879	O13493.2 RecName: Full=Myb-like DNA-binding protein myb-1 && PF13921:Myb-like DNA-binding domain	-
A13873	-4.76352	Contig8	1825922	1827859	+	1938	O42790.2 RecName: Full=Lysophospholipase; AltName: Full=Phospholipase B; Flags: Precursor && PF01735:Lysophospholipase catalytic domain	-
A08998	-4.3875	Contig3	1354898	1356840	+	1572	B3FWR7.1 RecName: Full=Cytochrome P450 monooxygenase hmp1; AltName: Full=Hypothemycin biosynthesis cluster protein hpm1 && PF00067:Cytochrome P450	p450
A08413	-7.31578	Contig34	177415	178888	-	1128	-	-
A07235	-4.43907	Contig2	2234727	2235687	+	882	-	-
A03637	-5.53451	Contig1	5532168	5534406	-	2082	B0Y665.1 RecName: Full=Lysophospholipase 1; AltName: Full=Phospholipase B 1; Flags: Precursor >P0C957.1 RecName: Full=Lysophospholipase 1; AltName: Full=Phospholipase B 1; Flags: Precursor && PF01735:Lysophospholipase catalytic domain	-
A04170	-7.61995	Contig1	1925767	1926519	-	753	-	-
A00661	-6.92582	Contig11	885784	886629	-	735	PF13472:GDSL-like Lipase/Acylhydrolase family	-
A11328	-4.08773	Contig55	79655	81600	-	1548	P38364.1 RecName: Full=Pisatin demethylase; AltName: Full=Cytochrome P450 57A2 && PF00067:Cytochrome P450	p450
A06280	4.59966	Contig28	331593	333458	+	1620	P0CE00.1 RecName: Full=Alpha-glucosides permease MPH3; AltName: Full=Maltose transport protein 3 && PF00083:Sugar (and other) transporter	Sugar_tr
A06516	-4.12732	Contig29	559507	559776	+	270	-	-
A05760	-6.421	Contig25	176793	178465	-	1614	Q9FNA2.1 RecName: Full=Polyamine oxidase 1; Short=AtPAO1; AltName: Full=N(1)-acetylpolyamine oxidase; AltName: Full=Spermine oxidase && PF01593:Flavin containing amine oxidoreductase	Amino_oxidase
A05375	-6.71714	Contig22	34666	36336	+	1137	PF05730:CFEM domain	-
A11132	-6.65789	Contig50	251980	253087	+	966	PF04479:RTA1 like protein	RTA1
A08199	4.63507	Contig32	489992	490614	+	567	PF05730:CFEM domain	-
A03320	-4.29055	Contig19	608792	610069	-	1071	Q9UTR6.2 RecName: Full=Initiation-specific alpha-1,6-mannosyltransferase && PF04488:Glycosyltransferase sugar-binding region containing DXD motif	Gly_transf_sug
A12409	-6.60249	Contig60	130077	131381	+	1305	-	-
A07691	-6.27469	Contig2	4153766	4154961	-	1131	Q8J0P4.2 RecName: Full=Probable glycosidase crf1; AltName: Full=Crh-like protein 1; AltName: Allergen=Asp f 9; Flags: Precursor && PF00722:Glycosyl hydrolases family 16	-
A06816	-5.50671	Contig2	5716414	5717202	+	789	-	-
A14231	-4.43458	Contig9	188162	190625	-	1527	-	-
A05613	-5.56215	Contig24	600074	600891	-	657	-	-
A13285	-5.95928	Contig7	1430826	1432880	+	1887	P78591.1 RecName: Full=Iron transport multicopper oxidase FET3; Flags: Precursor && PF07732:Multicopper oxidase|PF07731:Multicopper oxidase|PF00394:Multicopper oxidase	-
A01049	-6.8774	Contig12	1531297	1532451	-	885	PF05730:CFEM domain	-
A06642	-4.54604	Contig2	509630	510811	-	1182	PF00722:Glycosyl hydrolases family 16	-
A12226	-4.94916	Contig5	3185946	3188210	-	2205	-	-
A10027	-5.25558	Contig47	124982	126913	+	1932	-	-
A05782	4.07122	Contig25	258756	260761	-	1623	P39932.2 RecName: Full=Sugar transporter STL1 && PF00083:Sugar (and other) transporter	Sugar_tr
A10348	-5.67277	Contig4	1179831	1181678	-	1725	Q4WDN4.1 RecName: Full=Probable aspartic-type endopeptidase opsB; Flags: Precursor && PF00026:Eukaryotic aspartyl protease	Asp
A02542	-4.335	Contig16	1193396	1194566	+	996	PF11905:Domain of unknown function (DUF3425)	-
A13445	-5.96922	Contig7	2033598	2033882	+	285	-	-
A12510	4.51995	Contig6	1013283	1014476	-	1113	Q8J0P4.2 RecName: Full=Probable glycosidase crf1; AltName: Full=Crh-like protein 1; AltName: Allergen=Asp f 9; Flags: Precursor && PF00722:Glycosyl hydrolases family 16	-
A08804	-5.10974	Contig3	452448	454139	+	1533	B8M9J6.1 RecName: Full=Cytochrome P450 monooxygenase tropD; AltName: Full=Tropolone synthesis protein D && PF00067:Cytochrome P450	p450
A11449	-9.30856	Contig58	28908	29454	+	501	-	-
A06419	4.58116	Contig29	168356	170149	+	1620	O74923.1 RecName: Full=Uncharacterized transporter C757.13 && PF07690:Major Facilitator Superfamily	MFS_1
A01212	-5.00607	Contig12	551274	554706	+	3117	Q5BEJ6.1 RecName: Full=Iterative polyketide synthase afoE; AltName: Full=Asperfuranone biosynthesis protein B && PF07993:Male sterility protein|PF00501:AMP-binding enzyme	NAD_binding_4
A12256	-4.51903	Contig5	3327677	3330840	+	2715	PF00621:RhoGEF domain	RhoGEF
A11688	-7.70424	Contig5	1007539	1008865	+	1212	F1DBA8.1 RecName: Full=Mycophenolic acid synthesis protein B && -	-
A13854	-4.78239	Contig8	1741536	1744237	-	2553	B6HJU0.1 RecName: Full=Efflux pump roqT; AltName: Full=Roquefortine/meleagrin synthesis protein T && PF07690:Major Facilitator Superfamily	MFS_1
novel.318	-4.38767	Contig16	1096668	1099383	+	2607	-	-
A10713	-6.0706	Contig4	2847776	2849535	+	1659	-	-
A00349	-5.27749	Contig10	2013741	2015282	-	1542	-	-
A13499	4.49813	Contig7	2267638	2268861	+	1119	P59671.1 RecName: Full=60S ribosomal protein L3 && PF00297:Ribosomal protein L3	-
A11906	4.05391	Contig5	1829826	1830935	-	765	Q75AP7.1 RecName: Full=60S ribosomal protein L2 && PF00181:Ribosomal Proteins L2, RNA binding domain|PF03947:Ribosomal Proteins L2, C-terminal domain	Ribosomal_L2_C
A10215	4.28141	Contig49	250207	252115	-	1785	Q870L2.1 RecName: Full=Siderophore iron transporter mirB; AltName: Full=Major facilitator iron-regulated transporter B; AltName: Full=Triacetylfusarinine C permease && PF07690:Major Facilitator Superfamily	MFS_1
A01811	-4.88706	Contig14	654891	659091	-	4092	PF11915:Protein of unknown function (DUF3433)	-
A02085	4.04556	Contig15	270994	272449	+	720	Q9C0Z7.1 RecName: Full=40S ribosomal protein S6-B && PF01092:Ribosomal protein S6e	-
A07140	-4.36457	Contig2	1853935	1855726	+	1743	Q5V468.2 RecName: Full=Succinyl-CoA:mesaconate CoA-transferase && PF02515:CoA-transferase family III	CoA_transf_3
A07975	-4.35052	Contig30	526248	527792	+	1173	-	-
A11703	-5.98427	Contig5	1038881	1039703	-	732	-	-
A01181	4.65181	Contig12	423271	424287	-	1017	O14405.1 RecName: Full=Endoglucanase-4; AltName: Full=Cellulase IV; AltName: Full=Cellulase-61A; Short=Cel61A; AltName: Full=Endo-1,4-beta-glucanase IV; Short=EGIV; AltName: Full=Endoglucanase IV; AltName: Full=Endoglucanase-61A; Flags: Precursor && PF03443:Glycosyl hydrolase family 61	-
A02992	4.24553	Contig18	1035391	1036921	+	951	Q01369.1 RecName: Full=Guanine nucleotide-binding protein subunit beta-like protein; AltName: Full=Cross-pathway control WD-repeat protein cpc-2 && PF00400:WD domain, G-beta repeat	WD40
novel.1229	-5.55489	Contig8	1824528	1825804	+	1277	-	-
A06716	-6.44614	Contig2	5245606	5247534	+	1875	A1CFL2.1 RecName: Full=Dehydrogenase patE; AltName: Full=Patulin synthesis protein E; Flags: Precursor && PF05199:GMC oxidoreductase|PF00732:GMC oxidoreductase	-
A10318	4.41516	Contig4	122241	123051	+	576	P52810.1 RecName: Full=40S ribosomal protein S9; AltName: Full=S7 && PF00163:Ribosomal protein S4/S9 N-terminal domain|PF01479:S4 domain	S4
A10507	-5.23857	Contig4	230048	231686	+	471	-	-
novel.172	-7.08895	Contig11	1517153	1518100	-	896	-	-
A00436	-6.10557	Contig11	38497	40021	-	1437	PF01757:Acyltransferase family	-
A02998	4.0045	Contig18	1047455	1049107	-	708	Q8TFH1.1 RecName: Full=60S ribosomal protein L18-B && -	-
A01358	-5.72938	Contig13	833815	835516	+	1536	-	-
A08933	-5.49256	Contig3	1009459	1010460	+	861	P0CD92.1 RecName: Full=Aquaporin-1 && PF00230:Major intrinsic protein	-
A04205	7.24339	Contig1	2039783	2041442	+	1287	G0SGU4.1 RecName: Full=Formate dehydrogenase; Short=FDH; AltName: Full=NAD-dependent formate dehydrogenase && PF00389:D-isomer specific 2-hydroxyacid dehydrogenase, catalytic domain|PF02826:D-isomer specific 2-hydroxyacid dehydrogenase, NAD binding domain	2-Hacid_dh_C
A08173	4.04686	Contig32	338824	339997	+	690	Q9P720.1 RecName: Full=60S ribosomal protein L16; AltName: Full=Cytoplasmic ribosomal protein 46 && PF00572:Ribosomal protein L13	-
A04814	4.00866	Contig20	155350	155773	+	348	P23403.1 RecName: Full=40S ribosomal protein S20; AltName: Full=S22 && PF00338:Ribosomal protein S10p/S20e	Ribosomal_S10
A07227	4.00479	Contig2	2205668	2206657	+	780	O60128.1 RecName: Full=40S ribosomal protein S3 && PF00189:Ribosomal protein S3, C-terminal domain|PF07650:KH domain	-
A06080	-7.49838	Contig27	72784	74113	-	1062	-	-
A07664	5.60886	Contig2	441647	442383	+	447	O59936.1 RecName: Full=40S ribosomal protein S12 [Blumeria graminis f. sp. hordei] && PF01248:Ribosomal protein L7Ae/L30e/S12e/Gadd45 family	-
A04721	4.09365	Contig1	4118187	4121407	+	1863	P0C224.2 RecName: Full=Ubiquitin-60S ribosomal protein L40; Contains: RecName: Full=Ubiquitin; Contains: RecName: Full=60S ribosomal protein L40; AltName: Full=CEP52; AltName: Full=Cytoplasmic ribosomal protein 79; Short=CRP79; Flags: Precursor && PF00240:Ubiquitin family|PF01020:Ribosomal L40e family	ubiquitin
A11702	-7.36681	Contig5	1038181	1038600	+	420	-	-
A14630	-6.0278	Contig9	1737570	1738061	+	492	-	-
A12584	-4.40995	Contig6	1384584	1387043	-	2460	-	-
A01713	-4.02698	Contig14	236736	240501	-	2205	Q12612.1 RecName: Full=Trichodiene oxygenase; AltName: Full=Cytochrome P450 58 && PF00701:Dihydrodipicolinate synthetase family|PF00067:Cytochrome P450	p450
A00763	-4.64363	Contig11	1409392	1412810	-	3264	-	-
A08789	-4.4099	Contig3	396531	397259	+	729	-	-
A01487	4.76444	Contig13	1429740	1430070	-	279	-	-
A10701	-4.64404	Contig4	2828395	2829168	+	774	Q4WVZ0.1 RecName: Full=Uncharacterized protein AFUA_5G13800 && PF04299:Putative FMN-binding domain	FMN_bind_2
A07869	4.78706	Contig30	109109	110212	-	1104	-	-
A09745	-5.79193	Contig41	250392	251739	-	1290	-	-
A05585	4.35298	Contig24	518038	519145	-	894	B2B1Z3.1 RecName: Full=40S ribosomal protein S0 && PF00318:Ribosomal protein S2	-
A03156	-4.82137	Contig19	51736	52868	-	1017	-	-
A13828	4.60024	Contig8	1624896	1626039	+	780	P25443.3 RecName: Full=40S ribosomal protein S2; AltName: Full=Omnipotent suppressor protein SUP44; AltName: Full=RP12; AltName: Full=S4; AltName: Full=YS5 && PF03719:Ribosomal protein S5, C-terminal domain|PF00333:Ribosomal protein S5, N-terminal domain	-
A01367	4.02922	Contig13	913302	915059	+	1701	G3XMC0.1 RecName: Full=Acyl-CoA ligase azaF; AltName: Full=Azaphilone biosynthesis cluster protein azaF && PF00501:AMP-binding enzyme|PF13193:AMP-binding enzyme C-terminal domain	AMP-binding
A08416	6.03918	Contig34	187635	189369	-	1551	P53048.1 RecName: Full=General alpha-glucoside permease; AltName: Full=Maltose permease MAL11; AltName: Full=Maltose transport protein MAL11 && PF00083:Sugar (and other) transporter	Sugar_tr
A12320	4.31044	Contig5	3612680	3615135	-	2313	Q9UT19.1 RecName: Full=Probable 5-methyltetrahydropteroyltriglutamate--homocysteine methyltransferase; AltName: Full=Cobalamin-independent methionine synthase; AltName: Full=Methionine synthase, vitamin-B12 independent isozyme && PF08267:Cobalamin-independent synthase, N-terminal domain|PF01717:Cobalamin-independent synthase, Catalytic domain	-
A13314	-4.64952	Contig7	1563978	1566955	-	2928	-	-
A02628	-4.97211	Contig17	219131	220753	+	1314	PF07690:Major Facilitator Superfamily	MFS_1
A08424	7.30319	Contig34	207949	208944	-	726	PF10342:Ser-Thr-rich glycosyl-phosphatidyl-inositol-anchored membrane family	-
A12968	4.04313	Contig6	470523	472086	+	1089	P53444.2 RecName: Full=Fructose-bisphosphate aldolase; Short=FBP aldolase; Short=FBPA; AltName: Full=Fructose-1,6-bisphosphate aldolase && PF01116:Fructose-bisphosphate aldolase class-II	F_bP_aldolase
A10251	8.30917	Contig4	846504	848743	-	1407	P87252.1 RecName: Full=Woronin body major protein; Flags: Precursor && PF01287:Eukaryotic elongation factor 5A hypusine, DNA-binding OB fold	-
A04991	4.05845	Contig21	70842	71653	+	486	P0CT73.1 RecName: Full=40S ribosomal protein S11-A >P0CT74.1 RecName: Full=40S ribosomal protein S11-B && PF00366:Ribosomal protein S17|PF16205:Ribosomal_S17 N-terminal	-
A03640	5.09102	Contig1	77799	79034	-	1236	P0A3U6.1 RecName: Full=Protein Atu3128 >P0A3U7.1 RecName: Full=24.9 kDa protein in picA locus; AltName: Full=ORF1 && PF07470:Glycosyl Hydrolase Family 88	-
A14531	4.10063	Contig9	1285105	1288140	+	558	Q8L805.1 RecName: Full=60S ribosomal protein L35 && PF00831:Ribosomal L29 protein	-
A03157	-6.66767	Contig19	54122	55135	+	816	-	-
A08414	4.65064	Contig34	180740	183369	-	2505	P27034.1 RecName: Full=Beta-glucosidase; AltName: Full=Beta-D-glucoside glucohydrolase; AltName: Full=Cellobiase; AltName: Full=Gentiobiase && PF01915:Glycosyl hydrolase family 3 C-terminal domain|PF00933:Glycosyl hydrolase family 3 N terminal domain|PF14310:Fibronectin type III-like domain|PF07691:PA14 domain	Glyco_hydro_3_C
A06909	4.21647	Contig2	81326	82378	+	609	O43105.2 RecName: Full=40S ribosomal protein S7; AltName: Full=Cytoplasmic ribosomal protein 15 && PF01251:Ribosomal protein S7e	-
A10580	11.0099	Contig4	2230980	2232082	-	993	Q7LL04.2 RecName: Full=UPF0676 protein C1494.01 && PF14226:non-haem dioxygenase in morphine synthesis N-terminal|PF03171:2OG-Fe(II) oxygenase superfamily	2OG-FeII_Oxy
A02208	-6.59313	Contig15	808425	810028	+	1380	-	-
A09648	6.01473	Contig40	182378	183150	+	357	P21772.2 RecName: Full=40S ribosomal protein S26E; AltName: Full=13.6 kDa ribosomal protein; AltName: Full=CRP5 && PF01283:Ribosomal protein S26e	-
A05279	4.09235	Contig22	636424	637704	+	1281	A1DJ47.1 RecName: Full=Probable glucan endo-1,3-beta-glucosidase eglC; AltName: Full=Endo-1,3-beta-glucanase eglC; AltName: Full=Laminarinase eglC; Flags: Precursor && PF00332:Glycosyl hydrolases family 17	Glyco_hydro_17
A00463	10.8553	Contig11	104022	105335	-	1314	G2Q9T3.1 RecName: Full=Polysaccharide monooxygenase Cel61a; AltName: Full=Cellulase-61a; Short=Cel61a; AltName: Full=Endoglucanase-61a; AltName: Full=Glycoside hydrolase-61; Short=GH-61; Flags: Precursor && PF03443:Glycosyl hydrolase family 61	-
A07875	10.8258	Contig30	127790	128761	-	972	B0Y9G4.1 RecName: Full=Probable endo-beta-1,4-glucanase D; Short=Endoglucanase D; AltName: Full=Carboxymethylcellulase D; AltName: Full=Cellulase D; Flags: Precursor && PF03443:Glycosyl hydrolase family 61	-
novel.1093	4.22226	Contig6	402056	403484	+	1377	-	-
A10839	6.58657	Contig4	3328173	3330102	-	1734	P34054.1 RecName: Full=Amino-acid permease inda1 && PF00324:Amino acid permease	AA_permease
A11116	10.6956	Contig50	199767	202270	+	2013	P04842.2 RecName: Full=Alcohol oxidase 1; Short=AO 1; Short=AOX 1; AltName: Full=Methanol oxidase 1; Short=MOX 1 >F2QY27.1 RecName: Full=Alcohol oxidase 1; Short=AO 1; Short=AOX 1; AltName: Full=Methanol oxidase 1; Short=MOX 1 && PF00732:GMC oxidoreductase|PF05199:GMC oxidoreductase	-
A10071	5.04326	Contig47	357751	360159	-	2409	Q01738.1 RecName: Full=Cellobiose dehydrogenase; Short=CDH; AltName: Full=Cellobiose-quinone oxidoreductase; Flags: Precursor && PF00732:GMC oxidoreductase|PF05199:GMC oxidoreductase|PF16010:Cytochrome domain of cellobiose dehydrogenase	-
A13284	-4.12426	Contig7	1427428	1428705	-	1107	P40088.1 RecName: Full=Plasma membrane iron permease && PF03239:Iron permease FTR1 family	-
A04934	5.37403	Contig20	872447	873173	+	675	P11373.1 RecName: Full=Cutinase 1; AltName: Full=Cutin hydrolase 1; Flags: Precursor && PF01083:Cutinase	-
A02903	-6.67422	Contig18	613711	614743	+	825	-	-
A12571	10.4368	Contig6	1329187	1330210	+	969	O14405.1 RecName: Full=Endoglucanase-4; AltName: Full=Cellulase IV; AltName: Full=Cellulase-61A; Short=Cel61A; AltName: Full=Endo-1,4-beta-glucanase IV; Short=EGIV; AltName: Full=Endoglucanase IV; AltName: Full=Endoglucanase-61A; Flags: Precursor && PF03443:Glycosyl hydrolase family 61	-
A02039	4.89651	Contig15	87175	89084	-	1578	P04058.2 RecName: Full=Acetylcholinesterase; Short=AChE; Flags: Precursor && PF00135:Carboxylesterase family	COesterase
A05700	10.3763	Contig24	65881	66372	-	450	-	-
A00982	-6.91574	Contig12	1262629	1263947	-	1269	Q8X176.1 RecName: Full=Acid phosphatase; Flags: Precursor && PF04185:Phosphoesterase family	Phosphoesterase
A12567	10.3559	Contig6	1318973	1319795	+	765	A1DBJ7.1 RecName: Full=Probable pectate lyase E; Flags: Precursor && PF03211:Pectate lyase	-
A11108	10.3218	Contig50	163138	164645	+	1398	A1DAX2.1 RecName: Full=Probable exopolygalacturonase B; AltName: Full=Galacturan 1,4-alpha-galacturonidase B; AltName: Full=Poly(1,4-alpha-D-galacturonide)galacturonohydrolase B; Flags: Precursor && PF00295:Glycosyl hydrolases family 28	-
A05843	4.83501	Contig25	639179	643562	+	771	P0CX41.1 RecName: Full=60S ribosomal protein L23-A; AltName: Full=L17a; AltName: Full=YL32 >P0CX42.1 RecName: Full=60S ribosomal protein L23-B; AltName: Full=L17a; AltName: Full=YL32 && PF00238:Ribosomal protein L14p/L23e	-
A05628	10.3262	Contig24	653467	654378	-	912	Q7Z9M7.3 RecName: Full=Endoglucanase-7; AltName: Full=Cellulase-61B; Short=Cel61B; AltName: Full=Endo-1,4-beta-glucanase VII; Short=EGVII; AltName: Full=Endoglucanase VII; AltName: Full=Endoglucanase-61B; Flags: Precursor && PF03443:Glycosyl hydrolase family 61	-
novel.147	-4.5317	Contig10	954263	955012	-	505	-	-
A11547	-5.3231	Contig5	484753	485722	+	921	PF05368:NmrA-like family	NmrA
A01343	5.71052	Contig13	786169	788649	-	2430	D4AJR9.1 RecName: Full=Endo-1,3(4)-beta-glucanase ARB_04519; Flags: Precursor && -	-
A07449	-7.47322	Contig2	3097171	3097944	+	774	-	-
A04582	5.19412	Contig1	3415284	3416893	+	1551	P39932.2 RecName: Full=Sugar transporter STL1 && PF00083:Sugar (and other) transporter	Sugar_tr
A02844	4.47948	Contig17	1159225	1161713	-	2235	-	-
A04190	-4.45975	Contig1	1969929	1970528	+	600	-	-
A11402	5.17689	Contig57	47778	49772	+	1932	Q9ERH8.1 RecName: Full=Solute carrier family 28 member 3; AltName: Full=Concentrative Na(+)-nucleoside cotransporter 3; Short=CNT 3; Short=mCNT3 && PF01773:Na+ dependent nucleoside transporter N-terminus|PF07662:Na+ dependent nucleoside transporter C-terminus	-
A01071	10.0771	Contig12	1640784	1641779	+	996	O59939.1 RecName: Full=Pectate lyase B; Flags: Precursor [Colletotrichum gloeosporioides] && PF00544:Pectate lyase	-
A08788	-4.38931	Contig3	391375	394820	-	2007	-	-
A14306	7.15493	Contig9	451928	452702	+	657	PF10342:Ser-Thr-rich glycosyl-phosphatidyl-inositol-anchored membrane family	-
A03737	-9.0904	Contig1	6032487	6034356	+	1818	B5BSX1.1 RecName: Full=Beta-amyrin 11-oxidase; AltName: Full=Cytochrome P450 88D6 && PF00067:Cytochrome P450	p450
A06688	9.87022	Contig2	5147869	5148456	-	588	-	-
A07111	6.05839	Contig2	1729311	1729833	+	468	-	-
A08418	9.68688	Contig34	191912	193022	+	1050	PF07883:Cupin domain	Cupin_2
A05088	6.03776	Contig21	504332	505519	-	1131	Q7SI09.1 RecName: Full=L-arabinitol 4-dehydrogenase; Short=LAD && PF00107:Zinc-binding dehydrogenase|PF08240:Alcohol dehydrogenase GroES-like domain	ADH_N
A01020	-4.61969	Contig12	1394348	1395176	+	516	-	-
A01376	9.5622	Contig13	1015179	1015781	-	423	Q01302.2 RecName: Full=Clock-controlled protein 6 && -	-
A00642	4.47808	Contig11	800730	802447	+	1638	P15686.2 RecName: Full=H(+)/hexose cotransporter 1 && PF00083:Sugar (and other) transporter	Sugar_tr
A06917	-4.26955	Contig2	998136	1000072	-	1881	Q8QG60.2 RecName: Full=Cryptochrome-2 && PF00875:DNA photolyase|PF03441:FAD binding domain of DNA photolyase	-
A07559	8.2237	Contig2	3627900	3628625	-	534	Q03672.1 RecName: Full=ATP synthase subunit 9, mitochondrial; AltName: Full=Lipid-binding protein; Flags: Precursor && PF00137:ATP synthase subunit C	-
A09748	9.41484	Contig41	258415	263152	-	1107	PF03067:Chitin binding domain	-
A09754	9.40243	Contig41	285679	288165	+	2265	PF03169:OPT oligopeptide transporter protein	OPT
A07926	4.38481	Contig30	281710	285214	-	3111	P22189.1 RecName: Full=Calcium-transporting ATPase 3 && PF00702:haloacid dehalogenase-like hydrolase|PF00690:Cation transporter/ATPase, N-terminus|PF00122:E1-E2 ATPase|PF00689:Cation transporting ATPase, C-terminus	E1-E2_ATPase
A10245	4.31671	Contig4	757776	765542	-	2229	-	-
A06865	9.23738	Contig2	5884281	5886029	+	1518	P49374.1 RecName: Full=High-affinity glucose transporter && PF00083:Sugar (and other) transporter	Sugar_tr
A10239	9.20832	Contig4	732638	734766	-	2070	-	-
A04516	4.12036	Contig1	3169783	3170219	+	252	Q9C2P2.1 RecName: Full=40S ribosomal protein S29 && PF00253:Ribosomal protein S14p/S29e	Ribosomal_S14
A12810	6.46664	Contig6	2668938	2671761	-	2577	P40900.2 RecName: Full=Sexual differentiation process protein isp4 && PF03169:OPT oligopeptide transporter protein	OPT
A01129	9.06571	Contig12	32263	33168	+	906	B9KY71.1 RecName: Full=4-hydroxy-tetrahydrodipicolinate synthase; Short=HTPA synthase && PF00701:Dihydrodipicolinate synthetase family	-
A02501	-4.74747	Contig16	1051993	1056134	+	1377	-	-
A07003	4.99538	Contig2	1312922	1316275	-	3051	P28876.1 RecName: Full=Plasma membrane ATPase 2; AltName: Full=Proton pump 2 && PF00122:E1-E2 ATPase|PF00690:Cation transporter/ATPase, N-terminus|PF00702:haloacid dehalogenase-like hydrolase	E1-E2_ATPase
A09894	-4.62584	Contig42	405301	406190	-	822	-	-
A06864	7.78093	Contig2	616936	617747	-	756	-	-
A05423	4.94024	Contig22	230169	232328	-	2085	P12807.1 RecName: Full=Peroxisomal primary amine oxidase; AltName: Full=Copper amine oxidase; AltName: Full=Methylamine oxidase && PF02728:Copper amine oxidase, N3 domain|PF01179:Copper amine oxidase, enzyme domain|PF02727:Copper amine oxidase, N2 domain	-
A10547	8.78357	Contig4	2110579	2112715	-	2085	D4B5F9.2 RecName: Full=Probable peptidoglycan-N-acetylglucosamine deacetylase ARB_03699; Short=Peptidoglycan GlcNAc deacetylase; AltName: Full=Peptidoglycan N-deacetylase; Short=PG N-deacetylase; Flags: Precursor && PF00187:Chitin recognition protein|PF01522:Polysaccharide deacetylase	Polysacc_deac_1
A11505	8.75788	Contig59	63086	65842	-	2757	O31530.2 RecName: Full=Uncharacterized protein YetA && -	-
A06732	8.81108	Contig2	5325215	5326691	-	1419	Q2UG11.1 RecName: Full=Beta-cyclopiazonate dehydrogenase; AltName: Full=Beta-Cyclopiazonate oxidocyclase; AltName: Full=FAD-dependent oxidoreductase cpaO; Flags: Precursor >F5HN72.1 RecName: Full=Beta-cyclopiazonate dehydrogenase; AltName: Full=Beta-Cyclopiazonate oxidocyclase; AltName: Full=FAD-dependent oxidoreductase cpaO; Flags: Precursor && PF13450:NAD(P)-binding Rossmann-like domain	-
A06265	8.6619	Contig28	212513	214296	+	1674	P15685.1 RecName: Full=Maltose permease MAL61; AltName: Full=Maltose transport protein MAL61 && PF00083:Sugar (and other) transporter	Sugar_tr
A07273	6.16922	Contig2	2396167	2397921	-	1431	Q25BW4.1 RecName: Full=Beta-glucosidase 1B; AltName: Full=Cellobiase 1B && PF00232:Glycosyl hydrolase family 1	Glyco_hydro_1
A13690	6.14429	Contig8	894462	896140	-	1377	Q9F131.1 RecName: Full=3-hydroxybenzoate 6-hydroxylase 1; AltName: Full=Constitutive 3-hydroxybenzoate 6-hydroxylase && PF01494:FAD binding domain	FAD_binding_3
A07806	4.78362	Contig2	4542254	4544250	-	1890	A7Z1S7.1 RecName: Full=Uncharacterized oxidoreductase CzcO && PF13738:Pyridine nucleotide-disulphide oxidoreductase	-
A02902	-5.73472	Contig18	606432	611871	-	3993	-	-
A01128	8.62937	Contig12	29699	31183	+	1131	A0A0D2YG00.2 RecName: Full=Oxidase FUB9; AltName: Full=Fusaric acid biosynthesis protein 9 && PF01070:FMN-dependent dehydrogenase	FMN_dh
A02783	8.6257	Contig17	880673	883284	-	2322	P14002.2 RecName: Full=Thermostable beta-glucosidase B; AltName: Full=Beta-D-glucoside glucohydrolase; AltName: Full=Cellobiase; AltName: Full=Gentiobiase && PF14310:Fibronectin type III-like domain|PF00933:Glycosyl hydrolase family 3 N terminal domain|PF01915:Glycosyl hydrolase family 3 C-terminal domain	Glyco_hydro_3
novel.973	-5.80121	Contig5	1037689	1038156	+	468	-	-
A07665	4.31978	Contig2	3998458	4000941	-	2394	Q59RR0.1 RecName: Full=Cell wall transcription factor ACE2 && -	-
A01373	4.31491	Contig13	935738	949450	-	2307	A8JPF9.2 RecName: Full=Cell pattern formation-associated protein STUA; AltName: Full=Stunted protein A && -	-
A10192	-4.50132	Contig49	113640	114191	+	552	-	-
novel.521	-6.38347	Contig21	489586	490228	+	643	-	-
A14060	-5.08881	Contig8	2531634	2535247	+	2487	P79066.1 RecName: Full=Lipase 1; AltName: Full=Lipase I; AltName: Full=TFL I; Flags: Precursor && PF00135:Carboxylesterase family	COesterase
A05234	8.49565	Contig22	454375	455808	-	1434	Q8J1Y4.1 RecName: Full=Endo-1,4-beta-xylanase 5; Short=Xylanase 5; AltName: Full=1,4-beta-D-xylan xylanohydrolase 5; Flags: Precursor >G4MLU0.1 RecName: Full=Endo-1,4-beta-xylanase 5; Short=Xylanase 5; AltName: Full=1,4-beta-D-xylan xylanohydrolase 5; Flags: Precursor && PF00734:Fungal cellulose binding domain|PF00331:Glycosyl hydrolase family 10	-
A01408	8.52725	Contig13	1108452	1109375	+	924	-	-
A06115	8.47114	Contig27	185381	187077	-	1554	A6WXV2.1 RecName: Full=Glycerol kinase; AltName: Full=ATP:glycerol 3-phosphotransferase; AltName: Full=Glycerokinase; Short=GK && PF00370:FGGY family of carbohydrate kinases, N-terminal domain|PF02782:FGGY family of carbohydrate kinases, C-terminal domain	FGGY_N
A00329	-4.28458	Contig10	1957069	1958663	-	1263	-	-
A10692	5.20836	Contig4	2765818	2767701	+	1884	Q12473.1 RecName: Full=Ferric reductase transmembrane component 6; AltName: Full=Ferric-chelate reductase 6; Flags: Precursor && PF01794:Ferric reductase like transmembrane component|PF08022:FAD-binding domain|PF08030:Ferric reductase NAD binding domain	Ferric_reduct
A12368	8.48599	Contig5	3743805	3745199	+	1200	PF00264:Common central domain of tyrosinase	-
A11953	8.42324	Contig5	2002915	2004705	+	1515	P30263.1 RecName: Full=Peroxisomal catalase && PF06628:Catalase-related immune-responsive|PF00199:Catalase	Catalase
A07809	7.29151	Contig2	4562093	4563088	+	996	PF03443:Glycosyl hydrolase family 61	-
A07483	-5.11071	Contig2	3238983	3239819	-	837	-	-
A12831	8.34072	Contig6	2774537	2775139	-	531	PF07110:EthD domain	-
A00984	-4.13589	Contig12	1269271	1271376	+	2106	J9VY90.1 RecName: Full=Laccase-1; AltName: Full=Diphenol oxidase 1; Flags: Precursor && PF07732:Multicopper oxidase|PF07731:Multicopper oxidase|PF00394:Multicopper oxidase	-
A13607	-4.51278	Contig8	633424	638599	-	1782	-	-
A08001	5.09464	Contig31	69963	70811	+	687	P34227.1 RecName: Full=Mitochondrial peroxiredoxin PRX1; AltName: Full=1-Cys PRX; AltName: Full=Mitochondrial thiol peroxidase; Short=mTPx; AltName: Full=Thioredoxin reductase && PF00578:AhpC/TSA family|PF10417:C-terminal domain of 1-Cys peroxiredoxin	-
A10981	8.26818	Contig4	3887850	3888662	+	711	PF01965:DJ-1/PfpI family	DJ-1_PfpI
A07653	5.08311	Contig2	440275	440954	-	396	Q7RV75.1 RecName: Full=40S ribosomal protein S22; AltName: Full=Cytoplasmic ribosomal protein 27 && PF00410:Ribosomal protein S8	-
A13691	8.21654	Contig8	897095	897553	+	354	-	-
A05414	4.58098	Contig22	201214	202119	+	906	P33282.1 RecName: Full=Uricase; AltName: Full=Urate oxidase && PF01014:Uricase	-
A06838	8.2253	Contig2	5799639	5802776	-	3138	PF13385:Concanavalin A-like lectin/glucanases superfamily|PF04616:Glycosyl hydrolases family 43	-
A02676	8.20458	Contig17	403865	405606	-	1632	Q02906.1 RecName: Full=Alpha-amylase B; AltName: Full=1,4-alpha-D-glucan glucanohydrolase B; Flags: Precursor && PF09260:Domain of unknown function (DUF1966)|PF00128:Alpha amylase, catalytic domain	-
A14548	8.17858	Contig9	1355783	1356658	+	876	-	-
A13903	8.16224	Contig8	1992154	1993424	+	1203	PF06330:Trichodiene synthase (TRI5)	-
A13693	8.15003	Contig8	899976	901322	+	1284	PF12006:Protein of unknown function (DUF3500)	-
A05984	8.15789	Contig26	454287	456373	+	1926	U6A629.1 RecName: Full=Alpha-L-arabinofuranosidase A; Short=ABF A; Short=Arabinosidase A; AltName: Full=Arabinoxylan-arabinofuranohydrolase of 70 kDa; Short=AF-70; Flags: Precursor && PF06964:Alpha-L-arabinofuranosidase C-terminus	-
A07484	-7.3206	Contig2	3240287	3241330	-	951	-	-
A01603	8.1239	Contig13	226233	228759	-	1707	O59711.1 RecName: Full=Saccharopine dehydrogenase [NADP(+), L-glutamate-forming]; AltName: Full=Saccharopine reductase && PF00734:Fungal cellulose binding domain|PF03435:Saccharopine dehydrogenase NADP binding domain|PF16653:Saccharopine dehydrogenase C-terminal domain	Saccharop_dh
A14594	8.15629	Contig9	1591791	1593586	+	1614	P40445.1 RecName: Full=Uncharacterized transporter YIL166C && PF07690:Major Facilitator Superfamily	MFS_1
A13795	8.13443	Contig8	1473280	1474499	+	1158	-	-
A01145	8.10837	Contig12	223912	225284	+	1095	Q12177.1 RecName: Full=Uncharacterized protein YLL056C && PF05368:NmrA-like family	NmrA
A11578	4.5589	Contig5	72146	73182	+	456	P27073.1 RecName: Full=40S ribosomal protein S19; AltName: Full=S16 && PF01090:Ribosomal protein S19e	-
A06409	8.07176	Contig29	142168	143217	+	903	Q3ZFI7.1 RecName: Full=D-galacturonate reductase; AltName: Full=D-galacturonic acid reductase && PF00248:Aldo/keto reductase family	Aldo_ket_red
A02602	-8.30074	Contig17	115476	116483	+	1008	P9WK86.1 RecName: Full=Carboxylesterase NlhH >P9WK87.1 RecName: Full=Carboxylesterase NlhH && PF07859:alpha/beta hydrolase fold	Abhydrolase_3
A08471	8.06312	Contig34	428750	430653	-	1575	P49374.1 RecName: Full=High-affinity glucose transporter && PF00083:Sugar (and other) transporter	Sugar_tr
A00834	8.05993	Contig11	1853136	1854534	+	1023	PF13489:Methyltransferase domain	-
A03773	8.02745	Contig1	6136344	6137862	+	1056	Q2ULA2.2 RecName: Full=Secondary metabolism regulator laeA; AltName: Full=Methyltransferase laeA; AltName: Full=Velvet complex subunit laeA && PF13489:Methyltransferase domain	-
A13692	8.05469	Contig8	897987	899187	-	885	Q96GK7.1 RecName: Full=Fumarylacetoacetate hydrolase domain-containing protein 2A && PF01557:Fumarylacetoacetate (FAA) hydrolase family	FAA_hydrolase
A02231	8.05598	Contig15	872608	873804	+	1140	-	-
A09217	4.43281	Contig3	2381028	2382783	-	1698	P32946.1 RecName: Full=Lipase 2; Flags: Precursor && PF00135:Carboxylesterase family	COesterase
A10270	8.05204	Contig4	905683	906557	+	717	-	-
A01062	7.98207	Contig12	1590972	1592791	+	1611	P49374.1 RecName: Full=High-affinity glucose transporter && PF00083:Sugar (and other) transporter	Sugar_tr
A06033	8.01443	Contig26	624432	625753	+	1209	Q0C8J3.1 RecName: Full=Probable mannan endo-1,4-beta-mannosidase C; AltName: Full=Endo-beta-1,4-mannanase C; Flags: Precursor && PF00150:Cellulase (glycosyl hydrolase family 5)	-
A09794	7.98217	Contig42	64076	65895	+	1701	A1CFM2.1 RecName: Full=FAD-linked oxidoreductase patO; AltName: Full=Patulin synthesis protein O; Flags: Precursor && PF08031:Berberine and berberine like|PF01565:FAD binding domain	FAD_binding_4
A11711	7.91761	Contig5	118732	120873	-	1626	Q6MYX6.1 RecName: Full=Probable quinate permease; AltName: Full=Quinate transporter && PF00083:Sugar (and other) transporter	Sugar_tr
A02906	7.87938	Contig18	617863	619238	-	1212	PF04479:RTA1 like protein	RTA1
A04446	4.02569	Contig1	2900917	2901885	-	969	A6Y9S5.1 RecName: Full=L-threo-3-deoxy-hexylosonate aldolase; AltName: Full=L-threo-3-deoxy-hexulosonate aldolase && PF00701:Dihydrodipicolinate synthetase family	-
A02450	7.89506	Contig16	721295	722638	+	1242	F1DBB3.1 RecName: Full=O-methyltransferase mpaG; AltName: Full=Mycophenolic acid synthesis protein G && PF00891:O-methyltransferase	-
A03741	7.90353	Contig1	6040924	6042497	+	1305	A0A067Z9B6.1 RecName: Full=O-methyltransferase af390-400; AltName: Full=Fumagillin biosynthesis methyltransferase; Short=Fma-MT && PF00891:O-methyltransferase	-
A10664	7.87046	Contig4	2608411	2609901	+	1050	A7XRZ1.1 RecName: Full=Probable methyltransferase tdiE; AltName: Full=Terrequinone biosynthesis protein D && PF13489:Methyltransferase domain	-
A10974	5.01999	Contig4	3848609	3849386	-	714	Q4WFV6.1 RecName: Full=UPF0619 GPI-anchored membrane protein AFUA_3G00880; Flags: Precursor && PF10342:Ser-Thr-rich glycosyl-phosphatidyl-inositol-anchored membrane family	-
A11064	7.82697	Contig4	4194500	4196234	+	1671	P53048.1 RecName: Full=General alpha-glucoside permease; AltName: Full=Maltose permease MAL11; AltName: Full=Maltose transport protein MAL11 && PF00083:Sugar (and other) transporter	Sugar_tr
A07034	7.80519	Contig2	1444249	1445448	+	1200	M2SNN6.1 RecName: Full=Secondary metabolism regulator LAE1; AltName: Full=Methyltransferase LAE1; AltName: Full=Velvet complex subunit LAE1 && PF13489:Methyltransferase domain	-
A02429	7.83847	Contig16	584679	585759	+	984	A6Y9S5.1 RecName: Full=L-threo-3-deoxy-hexylosonate aldolase; AltName: Full=L-threo-3-deoxy-hexulosonate aldolase && PF00701:Dihydrodipicolinate synthetase family	-
A04226	-4.07772	Contig1	2110000	2111046	-	1047	PF00106:short chain dehydrogenase	adh_short
A09432	4.77464	Contig3	3382435	3383618	-	816	Q9P7B4.1 RecName: Full=NADP-dependent 3-hydroxy acid dehydrogenase; AltName: Full=L-allo-threonine dehydrogenase && PF00106:short chain dehydrogenase	adh_short
A01003	7.78045	Contig12	1342860	1345771	+	2457	Q7Z9M8.1 RecName: Full=Xyloglucanase; Short=XG; AltName: Full=Cel74a; Flags: Precursor && PF00734:Fungal cellulose binding domain	-
A02079	7.74008	Contig15	235697	236979	-	1233	D4AMB9.1 RecName: Full=Probable aldose 1-epimerase ARB_05372; AltName: Full=Galactose mutarotase; Flags: Precursor && PF01263:Aldose 1-epimerase	Aldose_epim
A00989	7.72069	Contig12	1286555	1288094	+	1476	Q9HZQ8.1 RecName: Full=Aminopeptidase; AltName: Full=Leucine aminopeptidase; AltName: Full=PaAP; Contains: RecName: Full=Aminopeptidase AP58; Contains: RecName: Full=Aminopeptidase AP56; Contains: RecName: Full=Aminopeptidase AP28; Flags: Precursor >Q02PA2.1 RecName: Full=Aminopeptidase; AltName: Full=Leucine aminopeptidase; AltName: Full=PaAP; Flags: Precursor && PF02225:PA domain|PF04389:Peptid…	-
A02642	7.73086	Contig17	259696	261983	-	2034	Q12556.2 RecName: Full=Copper amine oxidase 1 && PF01179:Copper amine oxidase, enzyme domain|PF02728:Copper amine oxidase, N3 domain	-
A02784	5.47672	Contig17	894762	897107	+	2292	P31434.2 RecName: Full=Alpha-xylosidase && PF13802:Galactose mutarotase-like|PF01055:Glycosyl hydrolases family 31	Glyco_hydro_31
A01137	7.65034	Contig12	138893	139644	-	690	PF00583:Acetyltransferase (GNAT) family	Acetyltransf_1
A12859	7.64661	Contig6	68530	69709	+	1125	Q2TXS4.1 RecName: Full=Pectin lyase 2; Short=PL2; AltName: Full=Pectin lyase D; Short=PLD; Flags: Precursor >B8NVB7.1 RecName: Full=Probable pectin lyase D; Short=PLD; Flags: Precursor && PF00544:Pectate lyase	-
A02432	7.66666	Contig16	596459	599764	+	2802	PF00501:AMP-binding enzyme	AMP-binding
A01835	-5.48669	Contig14	729561	730529	-	912	Q9Y7G8.1 RecName: Full=Cutinase; AltName: Full=Cutin hydrolase; Flags: Precursor && PF01083:Cutinase	-
A03387	7.62479	Contig19	848302	849627	-	1275	Q31XV2.1 RecName: Full=3-phenylpropionate/cinnamic acid dioxygenase subunit alpha && PF00355:Rieske [2Fe-2S] domain|PF00848:Ring hydroxylating alpha subunit (catalytic domain)	-
A08383	7.63325	Contig34	19826	21838	-	1626	P07921.1 RecName: Full=Lactose permease && PF00083:Sugar (and other) transporter	Sugar_tr
A04002	7.63367	Contig1	1266238	1267085	+	765	O31528.1 RecName: Full=Probable rhamnogalacturonan acetylesterase YesY; Short=RGAE && PF13472:GDSL-like Lipase/Acylhydrolase family	-
A01146	7.60849	Contig12	226084	230274	+	3033	P08157.2 RecName: Full=Aldehyde dehydrogenase; Short=ALDDH; Short=ALDH && PF06985:Heterokaryon incompatibility protein (HET)|PF00171:Aldehyde dehydrogenase family	Aldedh
A01139	7.72274	Contig12	170381	170675	+	246	-	-
A09135	-4.06056	Contig3	1915005	1921407	+	2250	PF05792:Candida agglutinin-like (ALS)	-
A12601	6.57905	Contig6	1440800	1441636	-	837	-	-
A09042	7.56663	Contig3	1532369	1533088	+	720	PF01965:DJ-1/PfpI family	DJ-1_PfpI
A12139	6.56951	Contig5	2794503	2795879	-	1317	Q4WGL5.1 RecName: Full=Secreted beta-glucosidase sun1; Flags: Precursor && PF03856:Beta-glucosidase (SUN family)	-
A12953	7.54863	Contig6	420550	421806	+	1152	Q12358.1 RecName: Full=Alpha-ketoglutarate-dependent sulfonate dioxygenase && PF02668:Taurine catabolism dioxygenase TauD, TfdA family	-
A07536	7.52793	Contig2	3541273	3542827	+	1107	A0A0H4LJX8.1 RecName: Full=Secondary metabolism regulator laeA; AltName: Full=Methyltransferase laeA; AltName: Full=Velvet complex subunit laeA && PF13489:Methyltransferase domain	-
A00569	7.51871	Contig11	508847	511734	+	2547	P00780.1 RecName: Full=Subtilisin Carlsberg; Flags: Precursor && PF13860:FlgD Ig-like domain|PF00082:Subtilase family|PF06280:Fn3-like domain|PF02225:PA domain	Peptidase_S8
A10738	4.72217	Contig4	2939319	2940794	+	1416	PF00150:Cellulase (glycosyl hydrolase family 5)	-
A01735	6.53607	Contig14	310878	311891	-	957	Q5Z8T3.1 RecName: Full=Probable inositol oxygenase; AltName: Full=Myo-inositol oxygenase; Short=MI oxygenase && PF05153:Myo-inositol oxygenase	-
A05561	7.51414	Contig24	439087	440289	+	1203	-	-
A10036	7.50838	Contig47	148846	150718	+	1749	O42922.1 RecName: Full=Uncharacterized MFS-type transporter C16A3.17c && PF07690:Major Facilitator Superfamily	MFS_1
novel.1207	4.60345	Contig7	1788147	1789011	-	736	-	-
A06863	6.47345	Contig2	5872718	5874599	-	1536	Q0D1I6.1 RecName: Full=Probable alpha-L-arabinofuranosidase C; Short=ABF C; Short=Arabinosidase C; Flags: Precursor && PF06964:Alpha-L-arabinofuranosidase C-terminus	-
A02428	7.48083	Contig16	582636	584023	-	987	Q10494.1 RecName: Full=Uncharacterized oxidoreductase C26F1.07 && PF00248:Aldo/keto reductase family	Aldo_ket_red
A04319	4.60234	Contig1	257953	258708	+	693	Q04432.1 RecName: Full=Glutathione-independent glyoxalase HSP31; AltName: Full=Glyoxalase 3 homolog 1; AltName: Full=Heat shock protein 31 && PF01965:DJ-1/PfpI family	DJ-1_PfpI
A09850	7.46783	Contig42	249024	250606	+	1080	A2SUH3.1 RecName: Full=Secondary metabolism regulator laeA; AltName: Full=Methyltransferase laeA; AltName: Full=Velvet complex subunit laeA && PF13489:Methyltransferase domain	-
A11975	7.47183	Contig5	2065774	2067316	+	1101	M2SNN6.1 RecName: Full=Secondary metabolism regulator LAE1; AltName: Full=Methyltransferase LAE1; AltName: Full=Velvet complex subunit LAE1 && PF13489:Methyltransferase domain	-
A08118	6.4765	Contig32	84202	85877	+	1437	Q9C0V1.1 RecName: Full=Ammonium transporter 1 && PF00909:Ammonium Transporter Family	Ammonium_transp
novel.1092	-4.72817	Contig6	202107	202938	+	832	-	-
A12834	7.51211	Contig6	2782221	2783321	+	837	-	-
A14489	5.27737	Contig9	1150420	1152071	-	1494	-	-
A02228	7.43266	Contig15	864945	866178	+	1167	D4AV38.1 RecName: Full=Probable secreted lipase ARB_00047; Flags: Precursor && -	-
A10452	7.45181	Contig4	198753	200260	-	1089	A0A0H4LJX8.1 RecName: Full=Secondary metabolism regulator laeA; AltName: Full=Methyltransferase laeA; AltName: Full=Velvet complex subunit laeA && PF13489:Methyltransferase domain	-
A00253	7.45223	Contig10	1599109	1600781	-	1557	Q12664.1 RecName: Full=Eburicol 14-alpha-demethylase; AltName: Full=CYPLI; AltName: Full=Cytochrome P450 51; AltName: Full=Cytochrome P450-14DM; AltName: Full=Cytochrome P450-LIA1; AltName: Full=Sterol 14-alpha demethylase && PF00067:Cytochrome P450	p450
A11619	7.41074	Contig5	765731	766767	+	975	Q5BA88.1 RecName: Full=Probable pectate lyase D; Flags: Precursor && PF03211:Pectate lyase	-
A04954	7.40002	Contig20	963843	964679	+	837	Q9X248.1 RecName: Full=3-oxoacyl-[acyl-carrier-protein] reductase FabG; AltName: Full=3-ketoacyl-acyl carrier protein reductase; AltName: Full=Beta-Ketoacyl-acyl carrier protein reductase; AltName: Full=Beta-ketoacyl-ACP reductase && PF00106:short chain dehydrogenase	adh_short
A02469	7.46031	Contig16	912893	913888	-	996	Q00645.1 RecName: Full=Pectate lyase plyB; Flags: Precursor && PF00544:Pectate lyase	-
novel.1241	7.36972	Contig8	613291	615272	-	1741	O43000.2 RecName: Full=Pantothenate transporter liz1 && PF07690:Major Facilitator Superfamily	MFS_1
A04953	7.39764	Contig20	961227	962903	+	1677	H3JQW0.1 RecName: Full=2-oxo-Delta(3)-4,5,5-trimethylcyclopentenylacetyl-CoA monooxygenase; Short=OTEMO; AltName: Full=(2,2,3-trimethyl-5-oxocyclopent-3-enyl)acetyl-CoA 1,5-monooxygenase; AltName: Full=MO2 && PF00743:Flavin-binding monooxygenase-like	FMO-like
A10728	7.32003	Contig4	2886976	2888697	+	1554	Q078T0.1 RecName: Full=3-hydroxyphenylacetate 6-hydroxylase && PF00067:Cytochrome P450	p450
A02926	7.31656	Contig18	704260	705742	+	1407	Q6U1Z4.1 RecName: Full=Alpha-1,3-mannosyltransferase CMT1 && PF11735:Cryptococcal mannosyltransferase 1	-
A09468	-5.6788	Contig3	3693634	3695273	+	1530	-	-
A00084	-4.09168	Contig10	995838	997184	+	1347	PF13483:Beta-lactamase superfamily domain	-
A12857	7.27796	Contig6	59144	60887	-	1071	B6H9U8.1 RecName: Full=Secondary metabolism regulator laeA; AltName: Full=Methyltransferase laeA; AltName: Full=Velvet complex subunit laeA && PF13489:Methyltransferase domain	-
A06116	7.27113	Contig27	190728	192070	+	1011	P23900.2 RecName: Full=Glycerol uptake/efflux facilitator protein && PF00230:Major intrinsic protein	-
A04498	7.27389	Contig1	3114568	3116611	+	1983	A1CFM2.1 RecName: Full=FAD-linked oxidoreductase patO; AltName: Full=Patulin synthesis protein O; Flags: Precursor && PF01565:FAD binding domain	FAD_binding_4
A03364	7.27283	Contig19	776298	777792	-	1050	PF13489:Methyltransferase domain	-
A13085	7.24912	Contig7	341331	343073	-	1383	P50125.2 RecName: Full=Homocysteine synthase; AltName: Full=O-acetylhomoserine sulfhydrylase; Short=OAH SHL; Short=OAH sulfhydrylase && PF01053:Cys/Met metabolism PLP-dependent enzyme	Cys_Met_Meta_PP
A04818	7.32305	Contig20	170869	172232	-	1230	PF00150:Cellulase (glycosyl hydrolase family 5)	-
A02431	7.29836	Contig16	593682	595584	-	1725	O13902.1 RecName: Full=Dihydroxyacetone kinase 1; Short=DHA kinase 1; AltName: Full=Glycerone kinase 1; AltName: Full=Triokinase 1; AltName: Full=Triose kinase 1 && PF02733:Dak1 domain|PF02734:DAK2 domain	-
A02232	7.27071	Contig15	874950	878450	+	2982	A1D1Z9.1 RecName: Full=Probable beta-galactosidase A; AltName: Full=Lactase A; Flags: Precursor && PF01301:Glycosyl hydrolases family 35|PF10435:Beta-galactosidase, domain 2|PF13363:Beta-galactosidase, domain 3|PF13364:Beta-galactosidase jelly roll domain	-
A08485	7.22409	Contig34	474805	476571	+	1767	Q05927.2 RecName: Full=5'-nucleotidase; Short=5'-NT; AltName: Full=Ecto-5'-nucleotidase; AltName: CD_antigen=CD73; Flags: Precursor && PF02872:5'-nucleotidase, C-terminal domain|PF00149:Calcineurin-like phosphoesterase	Metallophos
A07713	7.24197	Contig2	4255245	4256654	+	1071	G9P9X3.1 RecName: Full=Secondary metabolism regulator LAE1; AltName: Full=Methyltransferase LAE1; AltName: Full=Velvet complex subunit LAE1 >T1T504.1 RecName: Full=Secondary metabolism regulator LAE1; AltName: Full=Methyltransferase LAE1; AltName: Full=Velvet complex subunit LAE1 && PF13489:Methyltransferase domain	-
A14442	4.00175	Contig9	972996	974891	-	1596	Q4WPF5.1 RecName: Full=C2H2 finger domain transcription factor sebA; AltName: Full=Stress response element-binding protein A && PF00096:Zinc finger, C2H2 type	zf-C2H2
A01994	7.23256	Contig15	1207544	1210158	-	2400	P23622.3 RecName: Full=Sulfate permease 2; AltName: Full=Sulfate permease II && PF00916:Sulfate permease family|PF01740:STAS domain	Sulfate_transp
A10671	7.21694	Contig4	2640010	2641804	-	1746	Q8RJP2.1 RecName: Full=Rhamnogalacturonate lyase; Short=Rhamnogalacturonase; Flags: Precursor && PF14683:Polysaccharide lyase family 4, domain III|PF14686:Polysaccharide lyase family 4, domain II	-
A11636	-5.50159	Contig5	825986	827360	-	1317	-	-
A10425	-8.15295	Contig4	1489918	1490815	+	807	-	-
A00429	7.19334	Contig11	23291	24526	-	1236	-	-
A08929	7.17558	Contig3	998198	999453	-	1101	B5BP48.1 RecName: Full=Putative alpha-ketoglutarate-dependent sulfonate dioxygenase && PF02668:Taurine catabolism dioxygenase TauD, TfdA family	-
A06168	7.18915	Contig27	394227	401020	+	3387	Q2ULA2.2 RecName: Full=Secondary metabolism regulator laeA; AltName: Full=Methyltransferase laeA; AltName: Full=Velvet complex subunit laeA && PF13489:Methyltransferase domain	-
A12720	7.20028	Contig6	1988879	1991081	-	1773	Q6CMK7.1 RecName: Full=Delta 8-(E)-sphingolipid desaturase && PF00487:Fatty acid desaturase|PF00173:Cytochrome b5-like Heme/Steroid binding domain	-
A05333	7.17655	Contig22	885631	886743	-	978	-	-
A02220	7.16774	Contig15	840381	841487	+	1107	Q1LNM2.1 RecName: Full=Alkanesulfonate monooxygenase; AltName: Full=FMNH2-dependent aliphatic sulfonate monooxygenase && PF00296:Luciferase-like monooxygenase	-
A05520	7.18391	Contig24	267410	269102	-	1212	Q00374.1 RecName: Full=Pectin lyase; Flags: Precursor && PF00544:Pectate lyase	-
A11325	7.19179	Contig55	71977	72552	-	576	E3QRY8.1 RecName: Full=Putative glutathione-dependent formaldehyde-activating enzyme; AltName: Full=S-(hydroxymethyl)glutathione synthase && PF04828:Glutathione-dependent formaldehyde-activating enzyme	-
novel.328	-4.32605	Contig16	993941	994769	-	700	-	-
A01203	7.27456	Contig12	504437	505475	+	771	P94681.1 RecName: Full=4-formylbenzenesulfonate dehydrogenase TsaC1/TsaC2; AltName: Full=Toluenesulfonate zinc-independent alcohol dehydrogenase TsaC && PF00106:short chain dehydrogenase	adh_short
A10110	7.08433	Contig48	185531	187529	-	1620	P07921.1 RecName: Full=Lactose permease && PF00083:Sugar (and other) transporter	Sugar_tr
A04141	7.1005	Contig1	1805945	1806558	-	252	Q9C2B9.1 RecName: Full=60S ribosomal protein L38 && PF01781:Ribosomal L38e protein family	-
A03105	7.1209	Contig18	348022	352362	-	4293	Q00083.2 RecName: Full=Anucleate primary sterigmata protein A && PF12814:Meiotic cell cortex C-terminal pleckstrin homology	-
A01943	7.13815	Contig14	1415687	1416461	+	720	PF13419:Haloacid dehalogenase-like hydrolase	-
A02488	7.08781	Contig16	1002516	1005341	+	2709	P29141.1 RecName: Full=Minor extracellular protease vpr; Flags: Precursor && PF02225:PA domain|PF00082:Subtilase family	Peptidase_S8
A00546	7.12773	Contig11	407765	409546	-	1782	O60017.1 RecName: Full=Dihydroxyacetone kinase; Short=DHA kinase; AltName: Full=Glycerone kinase; AltName: Full=Triokinase; AltName: Full=Triose kinase && PF02733:Dak1 domain|PF02734:DAK2 domain	-
A02035	7.07334	Contig15	72534	74183	-	1296	-	-
A07726	5.0302	Contig2	4280659	4282383	+	1482	Q9P6J0.1 RecName: Full=Uncharacterized transporter C1683.12 && PF07690:Major Facilitator Superfamily	MFS_1
A11321	7.08933	Contig55	55545	57449	-	1848	Q9P380.1 RecName: Full=Probable peptide transporter ptr2; AltName: Full=Peptide permease ptr2 && PF00854:POT family	-
novel.368	4.3606	Contig19	157057	158591	+	1479	-	-
A02464	7.04648	Contig16	888671	890349	-	1518	Q9US37.1 RecName: Full=Uncharacterized transporter C1039.04 && PF07690:Major Facilitator Superfamily	MFS_1
A08816	4.99886	Contig3	494771	501539	+	2259	G0RNN3.2 RecName: Full=Secondary metabolism regulator LAE1; AltName: Full=Methyltransferase LAE1; AltName: Full=Velvet complex subunit LAE1 && PF00651:BTB/POZ domain|PF13489:Methyltransferase domain	BTB
A03944	7.02967	Contig1	1044022	1045397	-	1215	Q6Z965.1 RecName: Full=12-oxophytodienoate reductase 7; AltName: Full=12-oxophytodienoate-10,11-reductase 7; Short=OPDA-reductase 7; Short=OsOPR7 && PF00724:NADH:flavin oxidoreductase / NADH oxidase family	Oxidored_FMN
A02480	7.05268	Contig16	942037	943511	-	1050	PF13489:Methyltransferase domain	-
A11234	7.01702	Contig53	81761	82819	-	840	PF13489:Methyltransferase domain	-
A09828	7.01983	Contig42	153546	154955	-	1239	P79046.1 RecName: Full=Endo-1,4-beta-xylanase 1; Short=Xylanase 1; AltName: Full=1,4-beta-D-xylan xylanohydrolase 1; Flags: Precursor && PF00734:Fungal cellulose binding domain|PF00331:Glycosyl hydrolase family 10	-
A00550	7.02343	Contig11	419493	421228	-	1377	A1DLC1.2 RecName: Full=Probable exopolygalacturonase X; Short=ExoPG; AltName: Full=Galacturan 1,4-alpha-galacturonidase; AltName: Full=Poly(1,4-alpha-D-galacturonide)galacturonohydrolase; Flags: Precursor && PF00295:Glycosyl hydrolases family 28	-
A08920	7.03403	Contig3	943494	945335	-	1659	P53048.1 RecName: Full=General alpha-glucoside permease; AltName: Full=Maltose permease MAL11; AltName: Full=Maltose transport protein MAL11 && PF00083:Sugar (and other) transporter	Sugar_tr
A09104	7.02771	Contig3	1735580	1738753	-	1581	B5BP48.1 RecName: Full=Putative alpha-ketoglutarate-dependent sulfonate dioxygenase && PF02668:Taurine catabolism dioxygenase TauD, TfdA family	-
A09556	6.9996	Contig3	4060727	4062568	+	1584	O94491.1 RecName: Full=Uncharacterized transporter C417.10 && PF07690:Major Facilitator Superfamily	MFS_1
A06093	7.00729	Contig27	119583	121275	+	993	M2SNN6.1 RecName: Full=Secondary metabolism regulator LAE1; AltName: Full=Methyltransferase LAE1; AltName: Full=Velvet complex subunit LAE1 && PF13489:Methyltransferase domain	-
A10698	7.08124	Contig4	2817881	2820030	-	1392	A1DAX2.1 RecName: Full=Probable exopolygalacturonase B; AltName: Full=Galacturan 1,4-alpha-galacturonidase B; AltName: Full=Poly(1,4-alpha-D-galacturonide)galacturonohydrolase B; Flags: Precursor && PF00295:Glycosyl hydrolases family 28	-
A12162	7.02106	Contig5	2930232	2930649	+	252	PF12734:Cysteine-rich TM module stress tolerance	-
A05567	6.95001	Contig24	453018	454853	-	1719	A1CFM2.1 RecName: Full=FAD-linked oxidoreductase patO; AltName: Full=Patulin synthesis protein O; Flags: Precursor && PF08031:Berberine and berberine like|PF01565:FAD binding domain	FAD_binding_4
A03254	6.97388	Contig19	384303	385174	+	504	O43099.1 RecName: Full=Putative peroxiredoxin pmp20; AltName: Full=Peroxisomal membrane protein pmp20; AltName: Full=Thioredoxin reductase; AltName: Allergen=Asp f 3 && PF08534:Redoxin	-
A10908	6.95145	Contig4	3685179	3686171	+	942	D4B327.2 RecName: Full=Probable pathogenesis-related protein ARB_02861; AltName: Full=Wasp ves v 5 allergen homolog; Flags: Precursor && PF00188:Cysteine-rich secretory protein family	SCP
A01737	6.97291	Contig14	317506	319331	+	1704	P53048.1 RecName: Full=General alpha-glucoside permease; AltName: Full=Maltose permease MAL11; AltName: Full=Maltose transport protein MAL11 && PF00083:Sugar (and other) transporter	Sugar_tr
A10773	6.93837	Contig4	399538	400800	+	939	Q3ZFI7.1 RecName: Full=D-galacturonate reductase; AltName: Full=D-galacturonic acid reductase && PF00248:Aldo/keto reductase family	Aldo_ket_red
A12121	-4.99598	Contig5	2740208	2741347	+	1140	PF04724:Glycosyltransferase family 17	-
A13204	6.91734	Contig7	843080	844426	-	1290	-	-
A04468	6.90421	Contig1	2957964	2959412	+	1293	-	-
A07985	6.87804	Contig30	549143	550767	-	1506	P08157.2 RecName: Full=Aldehyde dehydrogenase; Short=ALDDH; Short=ALDH && PF00171:Aldehyde dehydrogenase family	Aldedh
A06173	6.88061	Contig27	409534	411011	-	1008	PF13489:Methyltransferase domain	-
A03631	6.89916	Contig1	5496814	5498829	-	2016	Q2U5P7.1 RecName: Full=Probable rhamnogalacturonate lyase C; Flags: Precursor && PF14683:Polysaccharide lyase family 4, domain III|PF14686:Polysaccharide lyase family 4, domain II	-
A06379	6.89978	Contig28	665339	667027	+	1632	P78710.1 RecName: Full=Putative rhamnogalacturonase; AltName: Full=Ascus development protein 1; Short=Asd-I; AltName: Full=Rhamnogalacturonan lyase; Short=RGase; Flags: Precursor && PF09284:Rhamnogalacturonan lyase B, N-terminal|PF14683:Polysaccharide lyase family 4, domain III|PF14686:Polysaccharide lyase family 4, domain II	-
A05831	6.87606	Contig25	598714	600635	+	1767	Q870L2.1 RecName: Full=Siderophore iron transporter mirB; AltName: Full=Major facilitator iron-regulated transporter B; AltName: Full=Triacetylfusarinine C permease && PF06609:Fungal trichothecene efflux pump (TRI12)	-
A00056	6.8877	Contig10	862862	864321	+	1203	Q9ZSA8.1 RecName: Full=Protein DMR6-LIKE OXYGENASE 1; AltName: Full=2-oxoglutarate (2OG)-Fe(II) oxygenase-like protein DLO1; AltName: Full=Protein SENESCENCE-ASSOCIATED GENE 108; AltName: Full=Salicylate 3-hydroxylase DLO1; Short=S3H DLO1; Short=SA 3-hydroxylase DLO1; Short=Salicylic acid 3-hydroxylase DLO1 && PF14226:non-haem dioxygenase in morphine synthesis N-terminal|PF03171:2OG-Fe(II) oxygen…	2OG-FeII_Oxy
A14593	6.86259	Contig9	1589190	1590555	-	1074	B5BP48.1 RecName: Full=Putative alpha-ketoglutarate-dependent sulfonate dioxygenase && PF02668:Taurine catabolism dioxygenase TauD, TfdA family	-
A13676	6.85877	Contig8	843825	846560	-	2547	P0CW87.1 RecName: Full=Cellulose synthase 1; Includes: RecName: Full=Cellulose synthase catalytic domain [UDP-forming]; Includes: RecName: Full=Cyclic di-GMP-binding domain; AltName: Full=Cellulose synthase 1 regulatory domain [Komagataeibacter xylinus] && PF13641:Glycosyltransferase like family 2	-
A08035	6.85252	Contig31	178118	179380	+	1263	D4AIS9.1 RecName: Full=Extracellular protein ARB_04177 && PF03009:Glycerophosphoryl diester phosphodiesterase family	-
A11214	6.8788	Contig52	208940	211150	+	2211	-	-
A04048	4.87173	Contig1	1428051	1429865	-	1815	P05804.2 RecName: Full=Beta-glucuronidase; Short=GUS; AltName: Full=Beta-D-glucuronoside glucuronosohydrolase && PF02836:Glycosyl hydrolases family 2, TIM barrel domain|PF02837:Glycosyl hydrolases family 2, sugar binding domain|PF00703:Glycosyl hydrolases family 2	-
A05879	-4.29855	Contig25	773466	774660	+	1020	O74959.1 RecName: Full=Uncharacterized oxidoreductase C736.13 && PF00106:short chain dehydrogenase	adh_short
A03912	7.13501	Contig1	887439	889185	-	1395	A1C5D3.1 RecName: Full=Probable alpha-galactosidase B; AltName: Full=Melibiase B; Flags: Precursor && PF16499:Alpha galactosidase A	-
A03951	6.87314	Contig1	1060511	1061710	-	1068	Q4W946.2 RecName: Full=2-oxoglutarate-Fe(II) type oxidoreductase; AltName: Full=Endocrocin synthesis protein D && PF03171:2OG-Fe(II) oxygenase superfamily|PF14226:non-haem dioxygenase in morphine synthesis N-terminal	2OG-FeII_Oxy
A01922	6.83415	Contig14	1338197	1339461	-	987	Q0GYU5.1 RecName: Full=D/L-glyceraldehyde reductase && PF00248:Aldo/keto reductase family	Aldo_ket_red
A11507	6.84107	Contig59	71114	72986	+	1656	-	-
A03948	6.8191	Contig1	1054882	1056148	-	957	B5ZA76.1 RecName: Full=Peptidoglycan deacetylase; Short=PG deacetylase; AltName: Full=Acetylxylan esterase && PF01522:Polysaccharide deacetylase	Polysacc_deac_1
A05030	5.95102	Contig21	224452	226204	+	1701	O69787.2 RecName: Full=Choline-sulfatase && PF12411:Choline sulfatase enzyme C terminal|PF00884:Sulfatase	Sulfatase
A01002	5.88824	Contig12	1339567	1341619	+	1638	P07921.1 RecName: Full=Lactose permease && PF00083:Sugar (and other) transporter	Sugar_tr
A08300	6.81739	Contig33	245707	247181	+	1422	B8NI10.1 RecName: Full=Beta-cyclopiazonate dehydrogenase; AltName: Full=Beta-Cyclopiazonate oxidocyclase; AltName: Full=FAD-dependent oxidoreductase cpaO; Flags: Precursor && PF13450:NAD(P)-binding Rossmann-like domain	-
A06654	-7.97079	Contig2	5031923	5032234	+	252	-	-
A04862	6.78401	Contig20	486624	487670	+	1047	P17872.1 RecName: Full=Pectinesterase; Short=PE; AltName: Full=Pectin methylesterase; Flags: Precursor && PF01095:Pectinesterase	-
A07795	-5.09248	Contig2	4510255	4511924	-	1416	PF07690:Major Facilitator Superfamily	MFS_1
A12891	6.79312	Contig6	168022	169947	+	1608	B8MYS7.1 RecName: Full=MFS glucose transporter mfs1; AltName: Full=Asparasone A synthesis protein mfs1 && PF00083:Sugar (and other) transporter	Sugar_tr
A04641	6.81176	Contig1	400717	401710	+	939	-	-
A08417	6.76525	Contig34	190220	191346	-	960	Q5ATJ7.1 RecName: Full=Non-reducing polyketide synthase ausA; AltName: Full=Austinol synthesis protein A; AltName: Full=Methylorcinaldehyde synthase ausA && PF12695:Alpha/beta hydrolase family	-
A13391	6.79261	Contig7	1856269	1857894	-	1068	Q4R0J7.1 RecName: Full=D-arabinitol dehydrogenase 1; AltName: Full=NADP-dependent D-arabitol dehydrogenase && PF00107:Zinc-binding dehydrogenase|PF08240:Alcohol dehydrogenase GroES-like domain	ADH_N
A12785	6.81095	Contig6	2564610	2565930	-	1167	G2QJ27.1 RecName: Full=Acetylesterase; AltName: Full=Carbohydrate esterase family 16 protein; Flags: Precursor && PF00734:Fungal cellulose binding domain	-
A13852	6.92917	Contig8	1734910	1736948	+	369	-	-
A09673	5.84518	Contig40	281926	283725	+	1584	Q9P6J0.1 RecName: Full=Uncharacterized transporter C1683.12 && PF07690:Major Facilitator Superfamily	MFS_1
A11012	6.80027	Contig4	4004568	4005686	-	1119	P0A3U6.1 RecName: Full=Protein Atu3128 >P0A3U7.1 RecName: Full=24.9 kDa protein in picA locus; AltName: Full=ORF1 && PF07470:Glycosyl Hydrolase Family 88	-
A10190	6.74669	Contig49	79847	80975	+	1011	Q8GCB2.1 RecName: Full=Pectate trisaccharide-lyase; AltName: Full=Exopolygalacturonate lyase; AltName: Full=Pectate lyase A; Short=PelA; Flags: Precursor >Q65DC2.1 RecName: Full=Pectate trisaccharide-lyase; AltName: Full=Exopolygalacturonate lyase; AltName: Full=Pectate lyase; Flags: Precursor >B1B6T1.1 RecName: Full=Pectate trisaccharide-lyase; AltName: Full=Exopolygalacturonate lyase; AltName: …	-
A00430	6.74466	Contig11	25809	27427	+	1569	D4ALG0.1 RecName: Full=LysM domain-containing protein ARB_05157; Flags: Precursor && -	-
A11525	4.89731	Contig59	116589	116900	+	252	-	-
A06598	4.13955	Contig2	502651	503764	+	1017	Q7LL04.2 RecName: Full=UPF0676 protein C1494.01 && PF03171:2OG-Fe(II) oxygenase superfamily|PF14226:non-haem dioxygenase in morphine synthesis N-terminal	2OG-FeII_Oxy
A06556	6.68148	Contig29	680988	682733	-	1584	P15828.2 RecName: Full=Exoglucanase 1; AltName: Full=1,4-beta-cellobiohydrolase; AltName: Full=Beta-glucancellobiohydrolase; AltName: Full=Exocellobiohydrolase I; AltName: Full=Exoglucanase I; Flags: Precursor && PF00840:Glycosyl hydrolase family 7|PF00734:Fungal cellulose binding domain	-
A11563	6.74305	Contig5	562071	563168	-	1041	Q5KMX3.1 RecName: Full=Probable 1-aminocyclopropane-1-carboxylate deaminase; Short=ACC deaminase; Short=ACCD && PF00291:Pyridoxal-phosphate dependent enzyme	PALP
A00799	6.71033	Contig11	1573378	1574970	+	1593	Q02906.1 RecName: Full=Alpha-amylase B; AltName: Full=1,4-alpha-D-glucan glucanohydrolase B; Flags: Precursor && PF09260:Domain of unknown function (DUF1966)|PF00128:Alpha amylase, catalytic domain	-
A10847	6.71187	Contig4	3418269	3420059	+	1698	PF11951:Fungal specific transcription factor domain	-
A13606	6.721	Contig8	628246	633143	+	3552	Q2UI87.2 RecName: Full=Probable alpha-galactosidase D; AltName: Full=Melibiase D; Flags: Precursor && PF16499:Alpha galactosidase A|PF06985:Heterokaryon incompatibility protein (HET)	-
A05084	6.66875	Contig21	475329	477134	+	1806	P78972.1 RecName: Full=WD repeat-containing protein slp1 && -	-
A10262	6.66418	Contig4	881894	885240	-	3084	B8NKI4.2 RecName: Full=Probable beta-galactosidase B; AltName: Full=Lactase B; Flags: Precursor && PF10435:Beta-galactosidase, domain 2|PF13363:Beta-galactosidase, domain 3|PF13364:Beta-galactosidase jelly roll domain|PF01301:Glycosyl hydrolases family 35	-
A13603	6.6635	Contig8	618975	620569	-	1545	Q9RC92.1 RecName: Full=Unsaturated glucuronyl hydrolase; Short=UGL; AltName: Full=Glycosaminoglycan hydrolase; AltName: Full=Glycuronidase; AltName: Full=Unsaturated uronic acid hydrolase && PF07470:Glycosyl Hydrolase Family 88	-
A10111	4.72688	Contig48	188813	192058	+	3126	P00723.2 RecName: Full=Beta-galactosidase; Short=Beta-gal; AltName: Full=Lactase && PF02929:Beta galactosidase small chain|PF16353:Domain of unknown function(DUF4981)|PF02836:Glycosyl hydrolases family 2, TIM barrel domain|PF00703:Glycosyl hydrolases family 2|PF02837:Glycosyl hydrolases family 2, sugar binding domain	-
A06452	4.71605	Contig29	274114	276905	-	1878	-	-
A06840	6.70851	Contig2	5806039	5807040	-	696	Q0CCF8.1 RecName: Full=Probable pectate lyase F; Flags: Precursor && PF03211:Pectate lyase	-
A10581	6.68298	Contig4	2233415	2234464	+	972	-	-
A11263	6.66516	Contig53	194533	205217	+	6807	D4B387.1 RecName: Full=Gamma-glutamyltransferase ARB_02921; AltName: Full=Gamma-glutamyltranspeptidase; Short=Gamma-GT; AltName: Full=Glutathione hydrolase; AltName: Full=Leukotriene-C4 hydrolase; Contains: RecName: Full=Gamma-glutamyltransferase heavy chain; Contains: RecName: Full=Gamma-glutamyltransferase light chain; Flags: Precursor && PF00082:Subtilase family|PF00083:Sugar (and other) trans…	Sugar_tr
A12711	5.75422	Contig6	1963109	1963582	+	414	PF10937:Protein of unknown function (DUF2638)	-
A10322	6.64028	Contig4	1099174	1100597	-	1311	Q4WCZ8.2 RecName: Full=Probable exopolygalacturonase X; Short=ExoPG; AltName: Full=Galacturan 1,4-alpha-galacturonidase; AltName: Full=Poly(1,4-alpha-D-galacturonide)galacturonohydrolase; Flags: Precursor >B0YDE8.2 RecName: Full=Probable exopolygalacturonase X; Short=ExoPG; AltName: Full=Galacturan 1,4-alpha-galacturonidase; AltName: Full=Poly(1,4-alpha-D-galacturonide)galacturonohydrolase; Flags…	-
A12176	6.63083	Contig5	3003286	3005637	-	2244	PF06011:Transient receptor potential (TRP) ion channel|PF14558:ML-like domain	-
A07776	6.71733	Contig2	4423734	4425940	-	1980	Q9WX75.1 RecName: Full=Putative cellulose synthase 3; Includes: RecName: Full=Cellulose synthase catalytic subunit [UDP-forming]; Includes: RecName: Full=Cyclic di-GMP-binding domain; AltName: Full=Cellulose synthase 3 regulatory subunit && PF13641:Glycosyltransferase like family 2	-
A11986	6.65803	Contig5	2106453	2107727	+	960	-	-
A05063	6.66868	Contig21	384675	386138	+	1119	A7XRZ1.1 RecName: Full=Probable methyltransferase tdiE; AltName: Full=Terrequinone biosynthesis protein D && PF13489:Methyltransferase domain	-
A11811	6.64602	Contig5	259497	260790	+	1182	P47734.2 RecName: Full=S-(hydroxymethyl)glutathione dehydrogenase; AltName: Full=Glutathione-dependent formaldehyde dehydrogenase; Short=FALDH; Short=FDH && PF00107:Zinc-binding dehydrogenase|PF08240:Alcohol dehydrogenase GroES-like domain	ADH_N
A06730	6.6263	Contig2	5322727	5324191	+	1194	-	-
A06414	6.6581	Contig29	149451	150730	+	1161	P83691.1 RecName: Full=Arabinogalactan endo-beta-1,4-galactanase; AltName: Full=Endo-1,4-beta-galactanase; Short=Galactanase && PF07745:Glycosyl hydrolase family 53	-
A14384	5.75737	Contig9	767442	769346	+	1620	P37967.2 RecName: Full=Para-nitrobenzyl esterase; AltName: Full=Intracellular esterase B; AltName: Full=PNB carboxy-esterase; Short=PNBCE && PF00135:Carboxylesterase family	COesterase
A06174	6.61294	Contig27	411523	413041	-	1017	PF13489:Methyltransferase domain	-
A03536	6.56407	Contig1	5071846	5073294	-	1329	Q9F131.1 RecName: Full=3-hydroxybenzoate 6-hydroxylase 1; AltName: Full=Constitutive 3-hydroxybenzoate 6-hydroxylase && PF01494:FAD binding domain	FAD_binding_3
A12161	6.5709	Contig5	2925939	2927328	-	1059	PF00397:WW domain	WW
A12943	6.55044	Contig6	386353	393893	+	6873	Q9USK8.3 RecName: Full=Cell wall alpha-1,3-glucan synthase ags1; AltName: Full=Cell wall alpha-1,4-glucan synthase && PF08323:Starch synthase catalytic domain|PF00534:Glycosyl transferases group 1|PF00128:Alpha amylase, catalytic domain	Glycos_transf_1
A07616	6.62217	Contig2	3870538	3871495	-	798	PF12351:Ca2+ regulator and membrane fusion protein Fig1	-
A08075	6.55504	Contig31	358161	358940	+	780	-	-
novel.1169	-6.0699	Contig7	1502140	1502785	+	589	-	-
A14069	6.63296	Contig8	395133	396630	-	1308	Q5AR04.2 RecName: Full=Probable mannan endo-1,4-beta-mannosidase F; AltName: Full=Endo-beta-1,4-mannanase F; Flags: Precursor && PF00150:Cellulase (glycosyl hydrolase family 5)|PF00734:Fungal cellulose binding domain	-
A06129	6.52718	Contig27	228422	229386	-	894	-	-
A04825	6.52814	Contig20	193146	194939	+	1491	Q4WFX9.2 RecName: Full=Probable leucine aminopeptidase 2; AltName: Full=Leucyl aminopeptidase 2; Short=LAP2; Flags: Precursor && PF02225:PA domain|PF04389:Peptidase family M28	-
A11314	4.71867	Contig55	37865	39072	+	1149	A1CFY8.2 RecName: Full=Probable D-xylulose reductase A; AltName: Full=Xylitol dehydrogenase A && PF00107:Zinc-binding dehydrogenase|PF08240:Alcohol dehydrogenase GroES-like domain	ADH_N
A08786	6.4988	Contig3	385851	387581	+	1566	-	-
A02677	6.51734	Contig17	410848	418008	+	7011	Q9Y719.2 RecName: Full=Cell wall alpha-1,3-glucan synthase mok13 && PF08323:Starch synthase catalytic domain|PF00128:Alpha amylase, catalytic domain|PF13692:Glycosyl transferases group 1	-
A06449	6.48426	Contig29	259745	261323	-	1395	O34714.1 RecName: Full=Oxalate decarboxylase OxdC && PF00190:Cupin	-
A11655	4.60195	Contig5	22833	28824	-	3069	Q7SDR1.1 RecName: Full=Endoglucanase gh5-1; AltName: Full=Cellulase gh5-1; AltName: Full=Endo-1,4-beta-glucanase gh5-1; Flags: Precursor && PF07690:Major Facilitator Superfamily|PF00150:Cellulase (glycosyl hydrolase family 5)|PF00734:Fungal cellulose binding domain	MFS_1
A07950	6.48694	Contig30	412056	414005	-	1674	Q92253.2 RecName: Full=Probable glucose transporter rco-3 && PF00083:Sugar (and other) transporter	Sugar_tr
A12238	6.49258	Contig5	3261495	3261983	-	489	-	-
A13441	6.47252	Contig7	1995305	2000398	-	4869	-	-
A06685	6.45793	Contig2	5144487	5144961	-	417	-	-
A06929	6.47165	Contig2	1038951	1040598	-	1599	PF09362:Domain of unknown function (DUF1996)	-
A00565	6.51427	Contig11	496619	498097	+	1479	Q25BW4.1 RecName: Full=Beta-glucosidase 1B; AltName: Full=Cellobiase 1B && PF00232:Glycosyl hydrolase family 1	Glyco_hydro_1
A06907	6.46836	Contig2	942530	943933	-	1404	PF02458:Transferase family	-
A06086	6.46337	Contig27	102460	104954	+	2385	P40900.2 RecName: Full=Sexual differentiation process protein isp4 && PF03169:OPT oligopeptide transporter protein	OPT
A11658	6.5012	Contig5	886399	888333	-	1872	-	-
A06783	6.45197	Contig2	5579502	5581966	+	2091	A2QPK4.2 RecName: Full=Probable beta-glucosidase D; AltName: Full=Beta-D-glucoside glucohydrolase D; AltName: Full=Cellobiase D; AltName: Full=Gentiobiase D; Flags: Precursor && PF00933:Glycosyl hydrolase family 3 N terminal domain|PF01915:Glycosyl hydrolase family 3 C-terminal domain|PF14310:Fibronectin type III-like domain	Glyco_hydro_3
A08187	4.55795	Contig32	390349	392518	+	1839	Q00922.1 RecName: Full=Alcohol oxidase; Short=AO; Short=AOX; AltName: Full=Methanol oxidase; Short=MOX && PF05199:GMC oxidoreductase|PF00732:GMC oxidoreductase	-
A05510	6.44303	Contig24	237695	244267	+	3390	Q078T0.1 RecName: Full=3-hydroxyphenylacetate 6-hydroxylase && PF00067:Cytochrome P450|PF01490:Transmembrane amino acid transporter protein|PF00106:short chain dehydrogenase	p450
A07636	6.47319	Contig2	3917272	3918294	+	1023	P40801.1 RecName: Full=Bifunctional protein GAL10; Includes: RecName: Full=UDP-glucose 4-epimerase; AltName: Full=Galactowaldenase; Includes: RecName: Full=Aldose 1-epimerase; AltName: Full=Galactose mutarotase && PF01263:Aldose 1-epimerase	Aldose_epim
A10735	-4.16587	Contig4	2929073	2930785	+	1713	Q00808.1 RecName: Full=Vegetative incompatibility protein HET-E-1 && PF06985:Heterokaryon incompatibility protein (HET)	-
A07785	6.44661	Contig2	4486761	4487465	-	705	-	-
A11891	6.44718	Contig5	1752088	1752681	-	594	-	-
A05250	6.49333	Contig22	507224	510952	-	2061	Q4A054.1 RecName: Full=Uncharacterized oxidoreductase SSP0419 && PF00106:short chain dehydrogenase	adh_short
A01225	6.41211	Contig12	626518	628080	+	1395	P39849.1 RecName: Full=Aryl-alcohol dehydrogenase; AltName: Full=Benzyl alcohol dehydrogenase; Short=BADH && PF08240:Alcohol dehydrogenase GroES-like domain|PF00107:Zinc-binding dehydrogenase	ADH_zinc_N
A12591	6.43797	Contig6	1402722	1403753	-	978	A7EWL8.1 RecName: Full=Thiamine thiazole synthase; AltName: Full=Thiazole biosynthetic enzyme && PF01946:Thi4 family	-
A12931	4.55123	Contig6	320371	321597	+	1170	-	-
A14457	-4.48226	Contig9	1031779	1032649	+	774	-	-
A13978	-6.91191	Contig8	325313	329561	+	4146	P12866.1 RecName: Full=Alpha-factor-transporting ATPase; AltName: Full=Mating factor A secretion protein STE6; AltName: Full=Multiple drug resistance protein homolog; AltName: Full=P-glycoprotein && PF00664:ABC transporter transmembrane region|PF00005:ABC transporter|PF07673:Protein of unknown function (DUF1602)	ABC_membrane
A02083	6.39472	Contig15	267146	268357	-	1104	P79046.1 RecName: Full=Endo-1,4-beta-xylanase 1; Short=Xylanase 1; AltName: Full=1,4-beta-D-xylan xylanohydrolase 1; Flags: Precursor && PF00331:Glycosyl hydrolase family 10	-
A09140	6.36325	Contig3	1957663	1958911	-	816	PF13489:Methyltransferase domain	-
A03362	5.5196	Contig19	770608	771573	+	966	PF09362:Domain of unknown function (DUF1996)	-
A07192	6.38064	Contig2	2105920	2106846	-	870	P10768.2 RecName: Full=S-formylglutathione hydrolase; Short=FGH; AltName: Full=Esterase D; AltName: Full=Methylumbelliferyl-acetate deacetylase && PF00756:Putative esterase	-
A03403	6.34607	Contig19	899508	901952	+	2445	Q01738.1 RecName: Full=Cellobiose dehydrogenase; Short=CDH; AltName: Full=Cellobiose-quinone oxidoreductase; Flags: Precursor && PF00732:GMC oxidoreductase|PF05199:GMC oxidoreductase|PF16010:Cytochrome domain of cellobiose dehydrogenase	-
A00426	6.34759	Contig11	12305	18832	-	3900	P36362.1 RecName: Full=Endochitinase; Flags: Precursor && PF00187:Chitin recognition protein|PF00704:Glycosyl hydrolases family 18	-
A05387	6.36549	Contig22	81526	83701	-	1995	A9AMZ9.1 RecName: Full=Oxygen-dependent choline dehydrogenase; Short=CDH; Short=CHD; AltName: Full=Betaine aldehyde dehydrogenase; Short=BADH && PF00732:GMC oxidoreductase|PF05199:GMC oxidoreductase	-
A04830	6.36278	Contig20	224416	225851	+	1029	PF13489:Methyltransferase domain	-
A05059	6.35559	Contig21	347173	349294	-	1635	P78710.1 RecName: Full=Putative rhamnogalacturonase; AltName: Full=Ascus development protein 1; Short=Asd-I; AltName: Full=Rhamnogalacturonan lyase; Short=RGase; Flags: Precursor && PF14683:Polysaccharide lyase family 4, domain III|PF14686:Polysaccharide lyase family 4, domain II|PF09284:Rhamnogalacturonan lyase B, N-terminal	-
A12703	6.35433	Contig6	1931671	1933873	+	1506	P49374.1 RecName: Full=High-affinity glucose transporter && PF00083:Sugar (and other) transporter	Sugar_tr
A02925	6.32441	Contig18	701922	703187	-	1212	-	-
A12621	6.33108	Contig6	1497882	1499112	-	1179	O49506.1 RecName: Full=Peroxisomal (S)-2-hydroxy-acid oxidase GLO5; AltName: Full=Glycolate oxidase 3; Short=AtGLO5; Short=GOX 3; AltName: Full=Short chain alpha-hydroxy acid oxidase GLO5 && PF01070:FMN-dependent dehydrogenase	FMN_dh
A07934	6.30789	Contig30	322219	323808	-	1332	A1DPF0.1 RecName: Full=Probable pectate lyase C; Flags: Precursor && -	-
A06013	6.32667	Contig26	566932	567946	+	855	Q00017.1 RecName: Full=Rhamnogalacturonan acetylesterase; Short=RGAE; Flags: Precursor && -	-
A09084	6.30998	Contig3	1686686	1687366	+	681	-	-
A03771	6.31147	Contig1	6129464	6130889	-	996	PF13489:Methyltransferase domain	-
A03032	6.34136	Contig18	1148195	1150081	-	1815	B3FWS5.1 RecName: Full=FAD-linked oxidoreductase hmp9; AltName: Full=Hypothemycin biosynthesis cluster protein hpm9; Flags: Precursor && PF01565:FAD binding domain|PF08031:Berberine and berberine like	FAD_binding_4
A01138	6.32072	Contig12	140765	141972	-	858	PF11807:Domain of unknown function (DUF3328)	-
A12858	6.2975	Contig6	61591	63497	-	1695	PF14683:Polysaccharide lyase family 4, domain III|PF14686:Polysaccharide lyase family 4, domain II	-
A06799	6.35578	Contig2	5638937	5640489	+	1155	Q9HTE3.1 RecName: Full=Glutathione-independent formaldehyde dehydrogenase; Short=FALDH; Short=FDH && PF13823:Alcohol dehydrogenase GroES-associated|PF00107:Zinc-binding dehydrogenase|PF08240:Alcohol dehydrogenase GroES-like domain	ADH_N
A02460	6.35102	Contig16	876677	877380	+	585	PF05730:CFEM domain	-
A08893	6.27109	Contig3	828168	830489	+	1869	Q8VZ80.2 RecName: Full=Polyol transporter 5; AltName: Full=Protein POLYOL TRANSPORTER 5; Short=AtPLT5; AltName: Full=Sugar-proton symporter PLT5 && PF00083:Sugar (and other) transporter	Sugar_tr
A04020	6.29	Contig1	134725	135855	-	1131	-	-
novel.959	-4.44931	Contig48	333258	334015	-	611	-	-
A10796	6.24958	Contig4	404702	405551	+	783	P50842.1 RecName: Full=2-dehydro-3-deoxy-D-gluconate 5-dehydrogenase; AltName: Full=2-keto-3-deoxygluconate 5-dehydrogenase; AltName: Full=2-keto-3-deoxygluconate oxidoreductase; Short=KDG oxidoreductase && PF00106:short chain dehydrogenase	adh_short
A04447	6.24668	Contig1	2905859	2907211	+	1251	PF01408:Oxidoreductase family, NAD-binding Rossmann fold	GFO_IDH_MocA
A09995	-7.27829	Contig46	82977	83422	-	354	-	-
A13604	6.26965	Contig8	622326	625983	+	2022	P39577.2 RecName: Full=Uncharacterized oxidoreductase DltE && PF00106:short chain dehydrogenase	adh_short
A00170	6.25031	Contig10	1311784	1315126	+	3015	PF02458:Transferase family|PF07992:Pyridine nucleotide-disulphide oxidoreductase	Pyr_redox_2
A12365	6.25613	Contig5	3740224	3741423	+	1200	Q09621.1 RecName: Full=Beta-lactamase domain-containing protein 2 && PF00144:Beta-lactamase	Beta-lactamase
A03772	6.34516	Contig1	6132538	6135922	+	2163	Q91WG0.1 RecName: Full=Acylcarnitine hydrolase; Short=ACH M1; AltName: Full=Carboxylesterase 2; Short=CES 2; AltName: Full=Peroxisome proliferator-inducible acylcarnitine hydrolase; Flags: Precursor && PF00135:Carboxylesterase family|PF06966:Protein of unknown function (DUF1295)	COesterase
A04951	5.41217	Contig20	953442	957685	-	3324	P0A5Y5.1 RecName: Full=3-oxoacyl-[acyl-carrier-protein] reductase FabG; AltName: Full=3-ketoacyl-acyl carrier protein reductase; AltName: Full=Beta-Ketoacyl-acyl carrier protein reductase; AltName: Full=Beta-ketoacyl-ACP reductase >P9WGT2.1 RecName: Full=3-oxoacyl-[acyl-carrier-protein] reductase FabG1; AltName: Full=3-ketoacyl-acyl carrier protein reductase; AltName: Full=Beta-Ketoacyl-acyl carr…	adh_short
A02427	6.2486	Contig16	580769	582072	-	1146	A8G7R4.1 RecName: Full=D-galactonate dehydratase; Short=GalD && PF13378:Enolase C-terminal domain-like|PF02746:Mandelate racemase / muconate lactonizing enzyme, N-terminal domain	MR_MLE_N
A01388	6.19381	Contig13	1050578	1051351	+	774	-	-
A09502	6.21722	Contig3	3814864	3816054	+	1191	-	-
A06886	6.20836	Contig2	706893	708661	-	1644	Q9WWW2.1 RecName: Full=Alcohol dehydrogenase [acceptor] && PF05199:GMC oxidoreductase|PF00732:GMC oxidoreductase	-
A10431	6.18275	Contig4	1511786	1513744	-	1746	Q12627.2 RecName: Full=D-lactate dehydrogenase [cytochrome], mitochondrial; AltName: Full=D-lactate ferricytochrome C oxidoreductase; Short=D-LCR; Flags: Precursor && PF02913:FAD linked oxidases, C-terminal domain|PF01565:FAD binding domain	FAD_binding_4
A06757	6.22029	Contig2	5393174	5394317	-	1086	PF00775:Dioxygenase	-
A04317	6.16815	Contig1	2455264	2456297	+	876	G0RH19.1 RecName: Full=L-xylulose reductase && PF00106:short chain dehydrogenase	adh_short
A08176	6.15994	Contig32	347949	348971	-	1023	B2HJU9.1 RecName: Full=Haloalkane dehalogenase && PF00561:alpha/beta hydrolase fold	Abhydrolase_1
A13541	6.1677	Contig7	2455876	2457015	-	1140	PF00775:Dioxygenase	-
A03152	5.32902	Contig19	25825	27766	+	1545	Q4I1N3.2 RecName: Full=Sulfate adenylyltransferase; AltName: Full=ATP-sulfurylase; AltName: Full=Sulfate adenylate transferase; Short=SAT && PF01747:ATP-sulfurylase|PF01583:Adenylylsulphate kinase|PF14306:PUA-like domain	-
A10579	6.16318	Contig4	2224854	2229150	-	2853	PF11951:Fungal specific transcription factor domain	-
A03464	6.16563	Contig1	4787634	4788539	-	798	P50197.1 RecName: Full=2,5-dichloro-2,5-cyclohexadiene-1,4-diol dehydrogenase; Short=2,5-DDOL dehydrogenase && PF00106:short chain dehydrogenase	adh_short
A09557	6.14442	Contig3	4063475	4067105	+	3288	Q9UT61.1 RecName: Full=Alpha-mannosidase; AltName: Full=Alpha-D-mannoside mannohydrolase && PF09261:Alpha mannosidase, middle domain|PF01074:Glycosyl hydrolases family 38 N-terminal domain|PF07748:Glycosyl hydrolases family 38 C-terminal domain	-
A14461	4.35262	Contig9	1050225	1052428	-	2013	Q9P326.1 RecName: Full=Transcriptional regulatory protein pro1; AltName: Full=Arrested development protein 1 && PF11951:Fungal specific transcription factor domain|PF00172:Fungal Zn(2)-Cys(6) binuclear cluster domain	Zn_clus
A11473	6.15556	Contig58	102477	106057	-	3330	PF15979:Glycosyl hydrolase family 115	-
A08431	6.14333	Contig34	237435	238271	+	591	-	-
A03807	6.15528	Contig1	629692	631376	+	1440	O34714.1 RecName: Full=Oxalate decarboxylase OxdC && PF00190:Cupin	-
A10035	6.11423	Contig47	145030	146749	-	1368	Q88FY2.1 RecName: Full=6-hydroxynicotinate 3-monooxygenase; Short=6HNA monooxygenase; AltName: Full=Nicotinate degradation protein C; Flags: Precursor && PF07992:Pyridine nucleotide-disulphide oxidoreductase|PF01494:FAD binding domain	FAD_binding_3
A05660	6.12214	Contig24	763306	765049	-	1401	P11551.3 RecName: Full=L-fucose-proton symporter; AltName: Full=6-deoxy-L-galactose permease; AltName: Full=L-fucose permease && PF07690:Major Facilitator Superfamily	MFS_1
A09730	6.10896	Contig41	183284	185272	+	1689	-	-
novel.703	6.11358	Contig3	1947036	1949054	-	1292	M2SNN6.1 RecName: Full=Secondary metabolism regulator LAE1; AltName: Full=Methyltransferase LAE1; AltName: Full=Velvet complex subunit LAE1 && -	-
A08214	6.08865	Contig32	520861	525525	+	2892	P50276.1 RecName: Full=High-affinity methionine permease && PF02668:Taurine catabolism dioxygenase TauD, TfdA family|PF13520:Amino acid permease	-
A03494	6.1301	Contig1	4896106	4897644	+	1437	O74851.1 RecName: Full=Probable secreted beta-glucosidase adg3; Flags: Precursor && PF03856:Beta-glucosidase (SUN family)	-
A06486	6.13297	Contig29	437160	438500	+	1281	Q12622.1 RecName: Full=Endoglucanase EG-1; AltName: Full=Cellulase; AltName: Full=Endo-1,4-beta-glucanase; Flags: Precursor && PF00840:Glycosyl hydrolase family 7	-
A02252	6.09298	Contig15	932013	933931	-	1740	Q9P8I0.2 RecName: Full=Delta-1-pyrroline-5-carboxylate dehydrogenase, mitochondrial; Short=P5C dehydrogenase; AltName: Full=L-glutamate gamma-semialdehyde dehydrogenase; Flags: Precursor && PF00171:Aldehyde dehydrogenase family	Aldedh
novel.273	6.07608	Contig14	642025	643508	+	1414	-	-
A07778	6.07841	Contig2	4464987	4467314	+	1869	Q19905.1 RecName: Full=UDP-glucose 6-dehydrogenase; Short=UDP-Glc dehydrogenase; Short=UDP-GlcDH; Short=UDPGDH; AltName: Full=Squashed vulva protein 4 && PF03721:UDP-glucose/GDP-mannose dehydrogenase family, NAD binding domain|PF03720:UDP-glucose/GDP-mannose dehydrogenase family, UDP binding domain|PF00984:UDP-glucose/GDP-mannose dehydrogenase family, central domain	-
A12928	6.08003	Contig6	296317	298361	-	1779	P34054.1 RecName: Full=Amino-acid permease inda1 && PF00324:Amino acid permease	AA_permease
A14091	6.0644	Contig8	458319	459092	-	774	-	-
A10269	6.11433	Contig4	902266	903323	-	840	-	-
A09712	6.10033	Contig41	75428	76717	+	1290	Q5A4E3.1 RecName: Full=Initiation-specific alpha-1,6-mannosyltransferase; AltName: Full=Outer chain elongation protein 1 && PF04488:Glycosyltransferase sugar-binding region containing DXD motif	Gly_transf_sug
A01144	6.04262	Contig12	221858	223538	+	1338	P14010.1 RecName: Full=4-aminobutyrate aminotransferase; AltName: Full=GABA aminotransferase; Short=GABA-AT; AltName: Full=Gamma-amino-N-butyrate transaminase; Short=GABA transaminase && PF00202:Aminotransferase class-III	Aminotran_3
A10323	6.03057	Contig4	1102199	1103478	+	1233	PF01095:Pectinesterase	-
A05041	6.04354	Contig21	258315	259526	+	1101	-	-
A10077	6.0427	Contig48	46454	47361	+	726	B9W4V6.1 RecName: Full=Aromatic peroxygenase; Short=AaP; Flags: Precursor && PF01328:Peroxidase, family 2	-
A03336	6.03174	Contig19	698891	699748	+	738	-	-
A13129	6.02929	Contig7	524934	526318	-	1119	B5FXE5.1 RecName: Full=Apoptosis-inducing factor 2 && PF07992:Pyridine nucleotide-disulphide oxidoreductase	Pyr_redox_2
A10758	6.12254	Contig4	3024432	3026163	+	1518	PF04030:D-arabinono-1,4-lactone oxidase|PF01565:FAD binding domain	FAD_binding_4
A04836	6.03612	Contig20	289753	291898	+	1641	P38156.1 RecName: Full=Maltose permease MAL31; AltName: Full=Maltose transport protein MAL31 && PF00083:Sugar (and other) transporter	Sugar_tr
A04952	6.026	Contig20	958632	960332	+	1701	P18696.2 RecName: Full=Proline-specific permease; AltName: Full=Proline transport protein && PF00324:Amino acid permease	AA_permease
A12954	6.01313	Contig6	423179	425133	+	1674	P40445.1 RecName: Full=Uncharacterized transporter YIL166C && PF07690:Major Facilitator Superfamily	MFS_1
A09752	6.06809	Contig41	277163	278493	-	1230	P42318.3 RecName: Full=Uncharacterized protein YxjG && PF01717:Cobalamin-independent synthase, Catalytic domain	-
A13469	6.03576	Contig7	2125104	2127804	-	2652	O74839.1 RecName: Full=Uncharacterized MscS family protein C1183.11 && PF00924:Mechanosensitive ion channel	-
A08472	5.99581	Contig34	431302	432793	+	1371	PF15892:BNR repeat-containing family member	-
A02946	5.97793	Contig18	805721	808363	+	2499	A1DFA8.1 RecName: Full=Probable beta-glucosidase I; AltName: Full=Beta-D-glucoside glucohydrolase I; AltName: Full=Cellobiase I; AltName: Full=Gentiobiase I && PF00933:Glycosyl hydrolase family 3 N terminal domain|PF14310:Fibronectin type III-like domain|PF01915:Glycosyl hydrolase family 3 C-terminal domain|PF07691:PA14 domain	Glyco_hydro_3_C
A00534	6.01555	Contig11	363380	365157	+	1650	P50276.1 RecName: Full=High-affinity methionine permease && PF13520:Amino acid permease	-
A05495	6.00848	Contig24	192897	194126	+	1059	PF04616:Glycosyl hydrolases family 43	-
A05282	6.00691	Contig22	648468	649724	-	1122	A1DBR6.1 RecName: Full=Probable endopolygalacturonase D; Short=PGD; AltName: Full=Pectinase D; AltName: Full=Polygalacturonase D; Flags: Precursor && PF00295:Glycosyl hydrolases family 28	-
A07264	5.98485	Contig2	235517	237143	+	1158	A7XRZ1.1 RecName: Full=Probable methyltransferase tdiE; AltName: Full=Terrequinone biosynthesis protein D && PF13489:Methyltransferase domain	-
A07496	-6.6865	Contig2	3322281	3323115	-	753	-	-
A00547	6.08328	Contig11	410114	410641	+	474	P0CL19.1 RecName: Full=Putative ribose 5-phosphate isomerase && PF02502:Ribose/Galactose Isomerase	LacAB_rpiB
A08987	5.9909	Contig3	1204894	1206464	+	1023	PF13489:Methyltransferase domain	-
A05546	5.97787	Contig24	383416	385128	-	1443	B0Y8H9.1 RecName: Full=1,3-beta-glucanosyltransferase gel2; AltName: Full=Glucan elongating glucanosyltransferase 2; Flags: Precursor >P0C954.1 RecName: Full=1,3-beta-glucanosyltransferase gel2; AltName: Full=Glucan elongating glucanosyltransferase 2; Flags: Precursor && PF03198:Glucanosyltransferase	-
A07166	5.97325	Contig2	1982175	1983527	-	1188	-	-
A14285	5.94486	Contig9	382601	386326	+	3630	PF00397:WW domain	WW
A10081	5.95594	Contig48	55445	58078	+	2634	PF08531:Alpha-L-rhamnosidase N-terminal domain|PF05592:Bacterial alpha-L-rhamnosidase	-
A10978	5.92409	Contig4	3860474	3871411	+	9597	G3XMD1.1 RecName: Full=Highly reducing polyketide synthase azaB; Short=HR-PKS azaB; AltName: Full=Azaphilone biosynthesis cluster protein azaB && PF00107:Zinc-binding dehydrogenase|PF00550:Phosphopantetheine attachment site|PF02801:Beta-ketoacyl synthase, C-terminal domain|PF08659:KR domain|PF00698:Acyl transferase domain|PF00109:Beta-ketoacyl synthase, N-terminal domain|PF08242:Methyltransferase…	ketoacyl-synt
A07275	5.94065	Contig2	238261	239462	+	885	P67773.1 RecName: Full=Uncharacterized protein Mb3657 >P9WI88.1 RecName: Full=Uncharacterized protein MT3735 >P9WI89.1 RecName: Full=Uncharacterized protein Rv3633 && PF05721:Phytanoyl-CoA dioxygenase (PhyH)	PhyH
A09403	5.98144	Contig3	3205109	3206457	+	1209	D4B0N9.1 RecName: Full=Probable 6-phosphogluconolactonase ARB_02015; Flags: Precursor && PF10282:Lactonase, 7-bladed beta-propeller	-
A02747	5.98185	Contig17	744530	746146	+	1617	-	-
A02592	5.92951	Contig17	80330	82148	+	1251	M2SNN6.1 RecName: Full=Secondary metabolism regulator LAE1; AltName: Full=Methyltransferase LAE1; AltName: Full=Velvet complex subunit LAE1 && PF13489:Methyltransferase domain	-
A02712	5.92685	Contig17	574126	575268	-	1143	Q7SIC2.1 RecName: Full=Quercetin 2,3-dioxygenase; AltName: Full=2,3QD; AltName: Full=Flavonol 2,4-dioxygenase; AltName: Full=Quercetinase && -	-
A08445	5.92247	Contig34	308037	310057	-	1959	PF06985:Heterokaryon incompatibility protein (HET)	-
A02449	5.9527	Contig16	718788	720229	-	1128	-	-
A05995	5.95379	Contig26	513649	514709	-	831	Q6CEE9.1 RecName: Full=Probable NADP-dependent mannitol dehydrogenase; Short=MtDH; AltName: Full=Mannitol 2-dehydrogenase [NADP(+)]; AltName: Full=Short chain dehydrogenase/reductase; Short=YlSDR && PF00106:short chain dehydrogenase	adh_short
A04510	5.93289	Contig1	3147773	3148854	-	984	PF00956:Nucleosome assembly protein (NAP)	-
A14165	5.93631	Contig9	2113642	2114869	-	1170	PF00775:Dioxygenase	-
A05611	5.91659	Contig24	594468	596913	+	2079	P46030.1 RecName: Full=Peptide transporter PTR2 && PF00854:POT family	-
A01154	4.20096	Contig12	265934	273276	+	3723	Q01738.1 RecName: Full=Cellobiose dehydrogenase; Short=CDH; AltName: Full=Cellobiose-quinone oxidoreductase; Flags: Precursor && PF16010:Cytochrome domain of cellobiose dehydrogenase|PF00734:Fungal cellulose binding domain|PF00732:GMC oxidoreductase|PF05199:GMC oxidoreductase	-
A08448	5.90538	Contig34	323080	324226	+	1089	B8N7Z8.1 RecName: Full=Probable endopolygalacturonase B; AltName: Full=Pectinase B; AltName: Full=Polygalacturonase B; Flags: Precursor && PF00295:Glycosyl hydrolases family 28	-
A13527	5.88787	Contig7	2412576	2413691	+	912	G3XMB9.1 RecName: Full=Ketoreductase azaE; AltName: Full=Azaphilone biosynthesis cluster protein azaE && PF01370:NAD dependent epimerase/dehydratase family	Epimerase
A06868	5.08558	Contig2	5937479	5939533	-	2055	-	-
A01849	5.89565	Contig14	822010	823338	+	1152	B2UCA8.1 RecName: Full=D-galactonate dehydratase; Short=GalD && PF13378:Enolase C-terminal domain-like|PF02746:Mandelate racemase / muconate lactonizing enzyme, N-terminal domain	MR_MLE_N
A02481	5.91554	Contig16	944192	945740	-	1101	PF13489:Methyltransferase domain	-
A03196	5.96934	Contig19	169721	171726	+	1578	P54854.1 RecName: Full=Hexose transporter HXT15 && PF00083:Sugar (and other) transporter	Sugar_tr
A12200	5.98554	Contig5	3092660	3093497	+	780	PF01965:DJ-1/PfpI family	DJ-1_PfpI
A10689	5.88405	Contig4	2752659	2753708	+	1050	P56859.3 RecName: Full=Phosphoadenosine phosphosulfate reductase; AltName: Full=3'-phosphoadenylylsulfate reductase; AltName: Full=PAPS reductase, thioredoxin dependent; AltName: Full=PAdoPS reductase && PF01507:Phosphoadenosine phosphosulfate reductase family	-
A03840	5.87117	Contig1	665265	666884	+	1056	PF13489:Methyltransferase domain	-
A11661	5.8587	Contig5	895371	897085	-	1659	Q9V4U7.2 RecName: Full=Probable cytochrome P450 6a14; AltName: Full=CYPVIA14 && PF00067:Cytochrome P450	p450
A03128	5.88068	Contig18	440806	442136	-	1056	Q40648.2 RecName: Full=Probable voltage-gated potassium channel subunit beta; AltName: Full=K(+) channel subunit beta && PF00248:Aldo/keto reductase family	Aldo_ket_red
A00808	5.07569	Contig11	1620121	1624328	-	2313	A2QQV6.1 RecName: Full=Probable quinate permease; AltName: Full=Quinate transporter && PF00083:Sugar (and other) transporter	Sugar_tr
A07030	5.89714	Contig2	1437588	1439327	-	1740	-	-
A05642	-4.59153	Contig24	705010	706028	+	774	-	-
A12257	5.86586	Contig5	3331876	3332518	+	345	PF01172:Shwachman-Bodian-Diamond syndrome (SBDS) protein	SBDS
A12127	5.86487	Contig5	2758016	2760673	-	2535	A1DD80.1 RecName: Full=Probable alpha-glucuronidase A; AltName: Full=Alpha-glucosiduronase A; Flags: Precursor && PF07488:Glycosyl hydrolase family 67 middle domain|PF07477:Glycosyl hydrolase family 67 C-terminus|PF03648:Glycosyl hydrolase family 67 N-terminus	-
A00568	5.90564	Contig11	503329	505031	+	1536	P32948.1 RecName: Full=Lipase 4; Flags: Precursor && PF00135:Carboxylesterase family	COesterase
A07576	5.85541	Contig2	3678265	3679962	+	1146	PF13489:Methyltransferase domain	-
A08709	5.88608	Contig3	32088	33862	+	1641	-	-
A07082	5.85574	Contig2	1618411	1619777	-	1257	-	-
A08294	5.86589	Contig33	228120	230473	-	2304	Q2UDK7.1 RecName: Full=Probable beta-glucosidase M; AltName: Full=Beta-D-glucoside glucohydrolase M; AltName: Full=Cellobiase M; AltName: Full=Gentiobiase M; Flags: Precursor && PF14310:Fibronectin type III-like domain|PF00933:Glycosyl hydrolase family 3 N terminal domain|PF01915:Glycosyl hydrolase family 3 C-terminal domain	Glyco_hydro_3_C
A05094	5.83708	Contig21	536044	537496	+	1392	D4AQ83.1 RecName: Full=PGA52-like protein ARB_06390; AltName: Full=Allergen Asp f 4 homolog; Flags: Precursor && PF10287:Putative TOS1-like glycosyl hydrolase (DUF2401)|PF10290:Glycine-rich protein domain (DUF2403)	-
A03943	5.85867	Contig1	1042030	1043542	+	1428	Q3S4B7.1 RecName: Full=3-hydroxybenzoate 6-hydroxylase && PF01494:FAD binding domain	FAD_binding_3
A08263	5.85432	Contig33	120660	121802	+	1143	A7XRZ1.1 RecName: Full=Probable methyltransferase tdiE; AltName: Full=Terrequinone biosynthesis protein D && PF13489:Methyltransferase domain	-
A07167	5.04798	Contig2	2001652	2002235	+	537	-	-
A01853	5.85546	Contig14	832484	833630	+	978	PF02558:Ketopantoate reductase PanE/ApbA|PF08546:Ketopantoate reductase PanE/ApbA C terminal	-
A11493	5.81889	Contig58	156483	156983	-	501	-	-
A03346	5.88006	Contig19	724979	726781	-	1476	Q9P6J0.1 RecName: Full=Uncharacterized transporter C1683.12 && PF07690:Major Facilitator Superfamily	MFS_1
A02015	5.80444	Contig15	1306551	1308083	-	1533	P72926.2 RecName: Full=UPF0187 protein sll1024 && PF01062:Bestrophin, RFP-TM, chloride channel	-
A04956	5.80829	Contig20	967188	969179	+	1992	Q01336.1 RecName: Full=Uncharacterized family 31 glucosidase ORF2 && PF01055:Glycosyl hydrolases family 31	Glyco_hydro_31
A06860	5.80636	Contig2	5867326	5868246	-	921	PF05368:NmrA-like family	NmrA
A11564	5.76652	Contig5	564232	565527	-	1212	PF02668:Taurine catabolism dioxygenase TauD, TfdA family	-
A07031	5.7844	Contig2	126790	128081	-	1182	PF01755:Glycosyltransferase family 25 (LPS biosynthesis protein)	-
A02238	5.76235	Contig15	889689	890296	-	546	-	-
A09304	5.79243	Contig3	2767175	2768912	+	1578	P25351.2 RecName: Full=Uncharacterized membrane protein YCR023C && PF07690:Major Facilitator Superfamily	MFS_1
A03417	5.80422	Contig1	17182	19121	-	1884	O13775.1 RecName: Full=Probable glutamate--tRNA ligase, cytoplasmic; AltName: Full=Glutamyl-tRNA synthetase; Short=GluRS && PF03950:tRNA synthetases class I (E and Q), anti-codon binding domain|PF00749:tRNA synthetases class I (E and Q), catalytic domain	-
A09414	5.85693	Contig3	3277942	3278338	-	216	PF05922:Peptidase inhibitor I9	-
A09225	5.76301	Contig3	2416645	2417216	+	516	PF13664:Domain of unknown function (DUF4149)	-
A06117	4.97256	Contig27	196669	198772	+	2049	Q64521.2 RecName: Full=Glycerol-3-phosphate dehydrogenase, mitochondrial; Short=GPD-M; Short=GPDH-M; AltName: Full=Protein TISP38; Flags: Precursor && PF16901:C-terminal domain of alpha-glycerophosphate oxidase|PF01266:FAD dependent oxidoreductase	DAO
A05600	-5.64213	Contig24	566779	568307	+	1485	P46882.1 RecName: Full=Monoamine oxidase N; Short=MAO-N && PF01593:Flavin containing amine oxidoreductase	Amino_oxidase
A09555	5.74719	Contig3	4056814	4059970	-	2769	PF15979:Glycosyl hydrolase family 115	-
A01092	5.74141	Contig12	1786137	1787903	+	1647	E9QYP0.1 RecName: Full=L-ornithine N(5)-monooxygenase; Short=OMO; AltName: Full=L-ornithine N(5)-oxygenase; AltName: Full=Siderphore biosynthesis protein A && PF13434:L-lysine 6-monooxygenase (NADPH-requiring)	-
A01670	5.81507	Contig14	114744	116493	-	1521	Q03647.1 RecName: Full=Alpha-galactosidase; AltName: Full=Alpha-D-galactoside galactohydrolase; AltName: Full=MELx; AltName: Full=Melibiase; Flags: Precursor && PF16499:Alpha galactosidase A	-
A07787	5.73391	Contig2	4489103	4489578	+	342	-	-
A00779	5.71974	Contig11	1495707	1497530	-	1644	P07921.1 RecName: Full=Lactose permease && PF00083:Sugar (and other) transporter	Sugar_tr
A00353	5.74534	Contig10	2042597	2044225	-	1581	Q9HDU2.1 RecName: Full=Galactokinase; AltName: Full=Galactose kinase && PF08544:GHMP kinases C terminal|PF00288:GHMP kinases N terminal domain|PF10509:Galactokinase galactose-binding signature	GHMP_kinases
A00498	5.68767	Contig11	204567	206100	+	1482	PF04616:Glycosyl hydrolases family 43	-
A01672	5.80191	Contig14	119708	121518	+	1650	P53048.1 RecName: Full=General alpha-glucoside permease; AltName: Full=Maltose permease MAL11; AltName: Full=Maltose transport protein MAL11 && PF00083:Sugar (and other) transporter	Sugar_tr
A08302	4.92813	Contig33	251096	255542	+	2199	Q4WZ65.1 RecName: Full=Cytochrome P450 monooxygenase easM; AltName: Full=Ergot alkaloid synthesis protein M && PF00067:Cytochrome P450|PF00106:short chain dehydrogenase	p450
A07936	5.68497	Contig30	335901	345695	-	4413	O74885.2 RecName: Full=Putative dioxygenase C576.01c && PF11710:G protein-coupled glucose receptor regulating Gpa2|PF02668:Taurine catabolism dioxygenase TauD, TfdA family	-
A11697	5.69548	Contig5	1026224	1028252	+	1749	Q8VZR6.1 RecName: Full=Inositol transporter 1 && PF00083:Sugar (and other) transporter	Sugar_tr
A01132	4.93887	Contig12	118779	124048	-	4512	Q92887.3 RecName: Full=Canalicular multispecific organic anion transporter 1; AltName: Full=ATP-binding cassette sub-family C member 2; AltName: Full=Canalicular multidrug resistance protein; AltName: Full=Multidrug resistance-associated protein 2 && PF00664:ABC transporter transmembrane region|PF00005:ABC transporter	ABC_membrane
A02851	5.67317	Contig17	1201598	1203443	-	1743	A1CFM2.1 RecName: Full=FAD-linked oxidoreductase patO; AltName: Full=Patulin synthesis protein O; Flags: Precursor && PF08031:Berberine and berberine like|PF01565:FAD binding domain	FAD_binding_4
A13677	5.68923	Contig8	850037	851773	+	1011	PF01670:Glycosyl hydrolase family 12	-
A12561	5.73449	Contig6	1294259	1294932	+	591	P14306.2 RecName: Full=Carboxypeptidase Y inhibitor; Short=CPY inhibitor; AltName: Full=CDC25 suppressor 1; AltName: Full=I(C); AltName: Full=Ic; AltName: Full=Protein DKA1; AltName: Full=Protein NSP1 && PF01161:Phosphatidylethanolamine-binding protein	-
A01396	5.66137	Contig13	1073061	1073966	+	906	PF13410:Glutathione S-transferase, C-terminal domain	-
A09006	-7.53287	Contig3	1421403	1422247	-	636	PF14232:Domain of unknown function (DUF4334)|PF14231:GXWXG protein	-
A03557	5.69946	Contig1	5192650	5194306	-	1530	-	-
A02185	5.67331	Contig15	683208	684620	+	1299	PF14378:PAP2 superfamily	-
A02759	5.67867	Contig17	781653	782758	-	1002	-	-
A07761	5.63755	Contig2	4389965	4391218	+	1254	O43029.1 RecName: Full=L-pipecolate oxidase; AltName: Full=L-pipecolic acid oxidase; Flags: Precursor && PF01266:FAD dependent oxidoreductase	DAO
A12726	5.68148	Contig6	2014512	2016554	-	2043	Q96TU3.1 RecName: Full=Extracellular exo-inulinase inuE; Flags: Precursor && PF08244:Glycosyl hydrolases family 32 C terminal|PF00251:Glycosyl hydrolases family 32 N-terminal domain	-
A08408	5.769	Contig34	127856	129205	+	1350	P44979.1 RecName: Full=Uncharacterized oxidoreductase HI_1010 && PF14833:NAD-binding of NADP-dependent 3-hydroxyisobutyrate dehydrogenase|PF03446:NAD binding domain of 6-phosphogluconate dehydrogenase	NAD_binding_2
A01942	5.64987	Contig14	1413056	1414830	-	1488	PF01266:FAD dependent oxidoreductase	DAO
A00494	5.66604	Contig11	193789	194370	+	465	-	-
A04752	5.62028	Contig1	432126	433877	+	1644	-	-
novel.952	5.64514	Contig47	157116	160052	+	2561	PF03446:NAD binding domain of 6-phosphogluconate dehydrogenase	NAD_binding_2
A06546	5.61315	Contig29	643999	646667	+	1986	P39849.1 RecName: Full=Aryl-alcohol dehydrogenase; AltName: Full=Benzyl alcohol dehydrogenase; Short=BADH && PF08240:Alcohol dehydrogenase GroES-like domain|PF00107:Zinc-binding dehydrogenase	ADH_zinc_N
A04679	5.63182	Contig1	3865474	3867079	-	1437	O94562.1 RecName: Full=Uncharacterized aminotransferase C1771.03c && PF00202:Aminotransferase class-III	Aminotran_3
A00272	5.6186	Contig10	1663211	1665117	-	1854	P55487.1 RecName: Full=Uncharacterized monooxygenase y4iD && PF13738:Pyridine nucleotide-disulphide oxidoreductase	-
A06578	4.84122	Contig29	44833	46563	-	1731	Q9HAC7.2 RecName: Full=Succinate--hydroxymethylglutarate CoA-transferase; AltName: Full=Dermal papilla-derived protein 13; AltName: Full=SuccinylCoA:glutarate-CoA transferase; Flags: Precursor && PF02515:CoA-transferase family III	CoA_transf_3
A00244	5.68507	Contig10	1576780	1578618	+	1839	-	-
A00305	5.59849	Contig10	1751250	1753224	+	1446	S0ENH1.1 RecName: Full=Putative aldehyde dehydrogenase FUS7; AltName: Full=Fusarin biosynthesis protein 7 && PF00171:Aldehyde dehydrogenase family	Aldedh
A10785	5.59342	Contig4	401299	402610	-	1137	Q9FJ95.1 RecName: Full=Sorbitol dehydrogenase; AltName: Full=L-iditol 2-dehydrogenase && PF00107:Zinc-binding dehydrogenase|PF08240:Alcohol dehydrogenase GroES-like domain	ADH_N
A12345	5.59429	Contig5	3687826	3688488	+	663	-	-
A12286	5.59534	Contig5	3468869	3470066	+	1044	O66761.1 RecName: Full=Putative L-lysine 2,3-aminomutase aq_454; Short=LAM && -	-
A01708	5.58173	Contig14	220786	224056	-	1341	D4ATA2.1 RecName: Full=Uncharacterized secreted protein ARB_07466; Flags: Precursor && PF13489:Methyltransferase domain	-
A14302	5.57261	Contig9	432910	436476	-	3387	O23180.2 RecName: Full=Patatin-like protein 5; Short=AtPLP5; AltName: Full=Patatin-related phospholipase A IIdelta; Short=pPLAIId; AltName: Full=Phospholipase A IVB; Short=AtPLAIVB && PF00931:NB-ARC domain|PF13374:Tetratricopeptide repeat|PF01734:Patatin-like phospholipase|PF13424:Tetratricopeptide repeat	NB-ARC
A14164	5.57706	Contig9	2110100	2112488	-	2286	PF02333:Phytase	-
A06727	4.83522	Contig2	5312756	5314245	-	1179	A1DBP9.1 RecName: Full=Probable acetylxylan esterase A; Flags: Precursor && PF10503:Esterase PHB depolymerase|PF00734:Fungal cellulose binding domain	-
A10446	5.57615	Contig4	1609410	1612372	+	2760	-	-
A12727	5.60272	Contig6	2018819	2023580	+	2625	P15325.2 RecName: Full=Quinate permease; AltName: Full=Quinate transporter && PF07690:Major Facilitator Superfamily|PF00083:Sugar (and other) transporter	Sugar_tr
A13325	5.58091	Contig7	1606314	1610936	+	1092	M2SNN6.1 RecName: Full=Secondary metabolism regulator LAE1; AltName: Full=Methyltransferase LAE1; AltName: Full=Velvet complex subunit LAE1 && PF13489:Methyltransferase domain	-
A13600	5.5701	Contig8	610669	613028	-	2157	PF10022:Uncharacterized protein conserved in bacteria (DUF2264)	-
A00219	5.59456	Contig10	1477364	1479082	-	1503	D4D3D1.1 RecName: Full=Probable leucine aminopeptidase 2; AltName: Full=Leucyl aminopeptidase 2; Short=LAP2; Flags: Precursor && PF04389:Peptidase family M28|PF02225:PA domain	-
A10771	5.60033	Contig4	3088809	3090454	+	1293	PF00657:GDSL-like Lipase/Acylhydrolase	Lipase_GDSL
A06150	5.63048	Contig27	286475	287733	+	1098	D4N501.1 RecName: Full=Probable 2-oxoglutarate/Fe(II)-dependent dioxygenase && PF14226:non-haem dioxygenase in morphine synthesis N-terminal|PF03171:2OG-Fe(II) oxygenase superfamily	2OG-FeII_Oxy
A03406	5.56085	Contig19	908913	909464	+	552	PF09351:Domain of unknown function (DUF1993)	-
A05255	5.59288	Contig22	528790	529119	+	330	-	-
A00276	5.55061	Contig10	1674917	1679951	+	4440	Q12553.2 RecName: Full=Xanthine dehydrogenase; AltName: Full=Purine hydroxylase I && PF01315:Aldehyde oxidase and xanthine dehydrogenase, a/b hammerhead domain|PF02738:Molybdopterin-binding domain of aldehyde dehydrogenase|PF00111:2Fe-2S iron-sulfur cluster binding domain|PF00941:FAD binding domain in molybdopterin dehydrogenase|PF03450:CO dehydrogenase flavoprotein C-terminal domain|PF01799:[2Fe…	Fer2
A13839	5.51023	Contig8	1698200	1699487	+	1056	G3XRG4.1 RecName: Full=Secondary metabolism regulator laeA; AltName: Full=Methyltransferase laeA; AltName: Full=Velvet complex subunit laeA && PF13489:Methyltransferase domain	-
A10700	5.53669	Contig4	2825635	2827399	+	1518	D4B1P2.1 RecName: Full=Uncharacterized FAD-linked oxidoreductase ARB_02372; Flags: Precursor && PF01565:FAD binding domain	FAD_binding_4
A04628	5.54406	Contig1	3558933	3560500	+	1263	-	-
A10857	5.50155	Contig4	3476663	3478139	-	1416	P03955.2 RecName: Full=Gastricsin; AltName: Full=Pepsinogen C; Flags: Precursor && PF00026:Eukaryotic aspartyl protease	Asp
A07751	5.52491	Contig2	4361556	4361927	-	372	-	-
A10681	5.55152	Contig4	2729908	2731116	-	1209	PF05721:Phytanoyl-CoA dioxygenase (PhyH)	PhyH
A06902	5.54221	Contig2	741398	742669	+	1272	B7IX20.1 RecName: Full=Anhydro-N-acetylmuramic acid kinase; AltName: Full=AnhMurNAc kinase && PF03702:Uncharacterised protein family (UPF0075)	-
A07294	4.76765	Contig2	2468812	2469968	-	1041	Q7SBB6.1 RecName: Full=Probable Delta(7)-sterol 5(6)-desaturase; AltName: Full=C-5 sterol desaturase; AltName: Full=Ergosterol Delta(5,6) desaturase; AltName: Full=Sterol-C5-desaturase && PF04116:Fatty acid hydroxylase superfamily	-
A08050	5.50116	Contig31	252611	254169	-	1425	PF00172:Fungal Zn(2)-Cys(6) binuclear cluster domain	Zn_clus
A07777	5.50788	Contig2	4431189	4432347	-	915	PF01670:Glycosyl hydrolase family 12	-
A13669	-5.42753	Contig8	819593	821028	+	1101	-	-
A07755	5.46659	Contig2	4375608	4376352	-	648	P0CB50.1 RecName: Full=Peroxiredoxin-1 && PF00578:AhpC/TSA family|PF10417:C-terminal domain of 1-Cys peroxiredoxin	-
A03611	5.52794	Contig1	5441687	5443623	+	1776	-	-
A00428	5.49696	Contig11	21143	22495	-	1293	-	-
A07508	-7.27759	Contig2	59778	60728	-	900	-	-
A12444	5.5148	Contig64	41254	44982	+	2601	PF04616:Glycosyl hydrolases family 43	-
A03949	5.52599	Contig1	1057168	1058059	+	765	Q6CEE9.1 RecName: Full=Probable NADP-dependent mannitol dehydrogenase; Short=MtDH; AltName: Full=Mannitol 2-dehydrogenase [NADP(+)]; AltName: Full=Short chain dehydrogenase/reductase; Short=YlSDR && PF00106:short chain dehydrogenase	adh_short
A03775	5.47414	Contig1	6138430	6139937	+	1062	PF13489:Methyltransferase domain	-
A11177	-7.30553	Contig52	60904	62107	+	1152	Q0QLE6.1 RecName: Full=3-methylitaconate isomerase; AltName: Full=(R)-3-methylitaconate isomerase; AltName: Full=3-methylitaconate delta-isomerase && PF04303:PrpF protein	-
A11913	5.49097	Contig5	1847489	1849195	-	1488	Q2U5H8.1 RecName: Full=Probable efflux pump kojT; AltName: Full=Kojic acid transporter && PF07690:Major Facilitator Superfamily	MFS_1
A00760	4.73468	Contig11	1400201	1402327	-	1971	Q02QC9.1 RecName: Full=Alkaline phosphatase H; AltName: Full=High molecular weight phosphatase; Short=H-AP; Flags: Precursor && PF00245:Alkaline phosphatase	-
A03946	5.43512	Contig1	1049666	1051682	-	1911	P15245.3 RecName: Full=Phenol 2-monooxygenase; AltName: Full=Phenol hydroxylase && PF01494:FAD binding domain|PF07976:Phenol hydroxylase, C-terminal dimerisation domain	FAD_binding_3
A04028	5.52149	Contig1	1343763	1344247	-	360	PF12585:Protein of unknown function (DUF3759)	-
A06678	5.42972	Contig2	5122733	5123675	+	792	Q9ZNN8.1 RecName: Full=L-2,3-butanediol dehydrogenase; Short=L-BDH; AltName: Full=(S,S)-butanediol dehydrogenase; AltName: Full=Diacetyl reductase [(S)-acetoin forming] && PF00106:short chain dehydrogenase	adh_short
A08835	5.45031	Contig3	582927	585258	+	1992	P25502.1 RecName: Full=Proline utilization trans-activator && PF04082:Fungal specific transcription factor domain	Fungal_trans
A12211	5.53543	Contig5	370413	375702	-	1887	PF01156:Inosine-uridine preferring nucleoside hydrolase	-
A14083	5.46992	Contig8	432922	434334	+	1245	-	-
A11535	5.46279	Contig59	137737	139137	+	1332	-	-
A14220	5.43471	Contig9	129879	133838	+	2118	Q5AR55.1 RecName: Full=Cyrochrome P450 monooxygenase asqL; AltName: Full=4'-methoxyviridicatin/aspoquinolone biosynthesis cluster protein asqL; AltName: Full=Aspoquinolone biosynthesis protein L && PF00067:Cytochrome P450|PF13489:Methyltransferase domain	p450
A02975	4.98905	Contig18	973399	974889	+	1281	Q12DF1.1 RecName: Full=L-rhamnonate dehydratase; Short=RhamD && PF02746:Mandelate racemase / muconate lactonizing enzyme, N-terminal domain|PF13378:Enolase C-terminal domain-like	MR_MLE_N
A07139	5.44613	Contig2	1843681	1844684	+	921	P86029.1 RecName: Full=Catechol 1,2-dioxygenase && PF04444:Catechol dioxygenase N terminus|PF00775:Dioxygenase	-
A08708	5.46405	Contig3	28320	29726	-	1407	Q9VQB7.1 RecName: Full=EGF domain-specific O-linked N-acetylglucosamine transferase; AltName: Full=Extracellular O-linked N-acetylglucosamine transferase; Flags: Precursor && PF04577:Protein of unknown function (DUF563)	-
novel.1284	5.55773	Contig9	2046539	2047299	+	695	-	-
A08787	5.46368	Contig3	388233	389929	+	1644	Q9C101.1 RecName: Full=Uncharacterized MFS-type transporter PB1E7.08c && PF07690:Major Facilitator Superfamily	MFS_1
A11876	5.43873	Contig5	1715276	1717899	-	2565	-	-
A07692	5.45062	Contig2	4156482	4157232	-	639	D4AK18.2 RecName: Full=Uncharacterized secreted protein ARB_06907; Flags: Precursor && PF07510:Protein of unknown function (DUF1524)	-
A08110	5.38119	Contig32	49626	51076	-	1248	O94478.1 RecName: Full=Meiotically up-regulated gene 137 protein && PF03114:BAR domain	-
A11081	5.41065	Contig50	69408	70537	-	1038	O58320.2 RecName: Full=Glyoxylate reductase && PF02826:D-isomer specific 2-hydroxyacid dehydrogenase, NAD binding domain|PF00389:D-isomer specific 2-hydroxyacid dehydrogenase, catalytic domain	2-Hacid_dh_C
A11329	5.43788	Contig55	83910	85387	-	1362	D7PI16.1 RecName: Full=O-methyltransferase gsfB; AltName: Full=Griseofulvin synthesis protein B && PF00891:O-methyltransferase	-
A03063	5.4313	Contig18	154907	157186	+	2196	PF11885:Protein of unknown function (DUF3405)	-
A02008	5.41255	Contig15	1287522	1288481	-	960	P44094.1 RecName: Full=Uncharacterized protein HI_1014 && PF01370:NAD dependent epimerase/dehydratase family	Epimerase
A14058	-4.56723	Contig8	2526083	2527813	+	1443	-	-
A01120	5.44965	Contig12	1911465	1912418	+	837	E3QKH9.1 RecName: Full=Extracellular metalloprotease GLRG_06511; Flags: Precursor && PF05572:Pregnancy-associated plasma protein-A	-
A09013	5.44301	Contig3	1444522	1446122	+	1341	-	-
A14512	5.34341	Contig9	1209113	1210835	-	1596	O14442.2 RecName: Full=Eburicol 14-alpha-demethylase; AltName: Full=CYPLI; AltName: Full=Cytochrome P450 51; AltName: Full=Cytochrome P450-14DM; AltName: Full=Cytochrome P450-LIA1; AltName: Full=Sterol 14-alpha demethylase [Erysiphe necator] && PF00067:Cytochrome P450	p450
A09607	5.37345	Contig40	24820	26718	-	1620	P07921.1 RecName: Full=Lactose permease && PF00083:Sugar (and other) transporter	Sugar_tr
A03991	5.37263	Contig1	1243543	1245004	+	1296	P54998.1 RecName: Full=Dibenzothiophene desulfurization enzyme C; AltName: Full=DBT sulfur dioxygenase && PF08028:Acyl-CoA dehydrogenase, C-terminal domain	Acyl-CoA_dh_2
A06745	5.38339	Contig2	5359432	5361038	-	1551	PF07938:Fungal fucose-specific lectin	-
A08250	-7.03342	Contig33	53928	54917	+	990	-	-
A05313	5.37537	Contig22	812106	814380	-	2055	Q12556.2 RecName: Full=Copper amine oxidase 1 && PF02727:Copper amine oxidase, N2 domain|PF01179:Copper amine oxidase, enzyme domain	-
A03380	5.36	Contig19	825104	826260	+	846	-	-
A13635	5.35395	Contig8	719812	721138	-	1275	L8FSM5.1 RecName: Full=Subtilisin-like protease 2; AltName: Full=Destructin-1; AltName: Full=Serine protease 2; Short=PdSP2; Flags: Precursor && PF00082:Subtilase family	Peptidase_S8
A11102	4.61312	Contig50	140636	141568	+	933	Q52995.2 RecName: Full=Probable enoyl-CoA hydratase && PF00378:Enoyl-CoA hydratase/isomerase	ECH
A02641	5.40427	Contig17	257108	257867	+	684	Q06562.1 RecName: Full=Endo-1,4-beta-xylanase I; Short=Xylanase I; AltName: Full=1,4-beta-D-xylan xylanohydrolase 1; Flags: Precursor && PF00457:Glycosyl hydrolases family 11	-
A00670	5.33819	Contig11	929564	930697	+	1080	P40332.2 RecName: Full=scyllo-inositol 2-dehydrogenase (NAD(+)) && PF01408:Oxidoreductase family, NAD-binding Rossmann fold	GFO_IDH_MocA
A03421	5.39242	Contig1	4580656	4581315	-	660	-	-
A08939	5.3456	Contig3	1034772	1036212	-	1149	PF00264:Common central domain of tyrosinase	-
novel.198	5.38926	Contig12	27491	28853	-	1287	-	-
A13657	5.35688	Contig8	785771	787224	-	1209	D4B0N9.1 RecName: Full=Probable 6-phosphogluconolactonase ARB_02015; Flags: Precursor && PF10282:Lactonase, 7-bladed beta-propeller	-
A00391	5.29819	Contig10	457122	459239	-	2118	-	-
A07527	5.32465	Contig2	3483985	3485517	+	1128	M2SNN6.1 RecName: Full=Secondary metabolism regulator LAE1; AltName: Full=Methyltransferase LAE1; AltName: Full=Velvet complex subunit LAE1 && PF13489:Methyltransferase domain	-
A01378	5.32423	Contig13	1025516	1026722	-	1098	B8M9K0.1 RecName: Full=Hydrolase tropI; AltName: Full=Tropolone synthesis protein I && PF01738:Dienelactone hydrolase family	-
A11103	5.34105	Contig50	141753	143459	-	1548	P39932.2 RecName: Full=Sugar transporter STL1 && PF00083:Sugar (and other) transporter	Sugar_tr
A04791	5.31807	Contig20	79586	80447	+	744	PF01083:Cutinase	-
A03798	5.32141	Contig1	6300193	6302334	-	1950	Q05497.1 RecName: Full=Uncharacterized transporter YDR338C && PF01554:MatE	MatE
A14375	4.58897	Contig9	716054	717078	+	942	PF09011:HMG-box domain	-
A01143	5.29099	Contig12	218620	221132	-	2457	PF00172:Fungal Zn(2)-Cys(6) binuclear cluster domain|PF11951:Fungal specific transcription factor domain	Zn_clus
A07354	4.56196	Contig2	2798610	2800166	+	1557	-	-
A00772	5.34765	Contig11	1465812	1476165	-	4938	O74923.1 RecName: Full=Uncharacterized transporter C757.13 && PF07690:Major Facilitator Superfamily|PF01565:FAD binding domain	MFS_1
A04841	5.29287	Contig20	304899	309092	-	3999	P49754.3 RecName: Full=Vacuolar protein sorting-associated protein 41 homolog; AltName: Full=S53 && PF00637:Region in Clathrin and VPS	-
A04443	5.36286	Contig1	2877344	2879966	-	2565	PF11951:Fungal specific transcription factor domain|PF00172:Fungal Zn(2)-Cys(6) binuclear cluster domain	Zn_clus
A09302	5.30945	Contig3	2752526	2753804	+	909	P24552.1 RecName: Full=D-amino-acid oxidase; Short=DAAO; Short=DAMOX; Short=DAO && PF01266:FAD dependent oxidoreductase	DAO
A00465	5.42573	Contig11	110730	111052	-	216	-	-
A03952	5.33084	Contig1	1062639	1063990	-	1242	P0ABR8.1 RecName: Full=Putative dioxygenase subunit alpha YeaW >P0ABR7.1 RecName: Full=Putative dioxygenase subunit alpha YeaW && PF00848:Ring hydroxylating alpha subunit (catalytic domain)|PF00355:Rieske [2Fe-2S] domain	-
A07581	5.30785	Contig2	3693768	3694832	+	1065	-	-
A03061	-4.24625	Contig18	1241429	1243744	+	2259	B8NM69.1 RecName: Full=Peptidase S41 family protein ustP; AltName: Full=Ustiloxin B biosynthesis protein P && PF03572:Peptidase family S41	Peptidase_S41
A04090	5.29729	Contig1	1601037	1601636	+	600	B0Y004.1 RecName: Full=Cell wall protein phiA; AltName: Full=Major allergen phiA; AltName: Full=Phialide development protein A; AltName: Allergen=Asp f 34; Flags: Precursor >A4FSH5.1 RecName: Full=Cell wall protein phiA; AltName: Full=Major allergen phiA; AltName: Full=Phialide development protein A; AltName: Allergen=Asp f 34; Flags: Precursor && -	-
A10849	5.27714	Contig4	3456793	3458499	-	1497	O43000.2 RecName: Full=Pantothenate transporter liz1 && PF07690:Major Facilitator Superfamily	MFS_1
A03195	5.30291	Contig19	166450	168310	-	1599	PF12831:FAD dependent oxidoreductase	-
A09769	5.26765	Contig41	346322	347371	-	1050	N4WR35.1 RecName: Full=NADP-dependent oxidoreductase RED1; AltName: Full=T-toxin biosynthesis protein RED1 && PF16884:N-terminal domain of oxidoreductase|PF00107:Zinc-binding dehydrogenase	ADH_zinc_N
A07287	5.35093	Contig2	242051	243093	-	996	-	-
novel.989	5.30372	Contig5	1790072	1792605	+	2457	-	-
A12316	5.28239	Contig5	3598269	3601882	-	2013	M2SNN6.1 RecName: Full=Secondary metabolism regulator LAE1; AltName: Full=Methyltransferase LAE1; AltName: Full=Velvet complex subunit LAE1 && PF13489:Methyltransferase domain	-
A08496	5.27509	Contig34	505293	507266	-	1815	Q8NE62.2 RecName: Full=Choline dehydrogenase, mitochondrial; Short=CDH; Short=CHD; Flags: Precursor && PF05199:GMC oxidoreductase|PF00732:GMC oxidoreductase	-
A10765	5.36925	Contig4	3055003	3057869	+	2715	PF11915:Protein of unknown function (DUF3433)	-
A12281	4.53358	Contig5	3448002	3450317	+	2316	-	-
A11519	5.2492	Contig59	99598	100807	+	1095	PF00026:Eukaryotic aspartyl protease	Asp
A09620	5.25331	Contig40	72547	80887	+	3747	Q69ZS6.2 RecName: Full=Synaptic vesicle glycoprotein 2C; Short=Synaptic vesicle protein 2C && PF07690:Major Facilitator Superfamily|PF07287:Protein of unknown function (DUF1446)	MFS_1
A11631	5.24895	Contig5	812874	815641	+	2550	-	-
A02504	5.26871	Contig16	1060781	1062568	-	1599	P53048.1 RecName: Full=General alpha-glucoside permease; AltName: Full=Maltose permease MAL11; AltName: Full=Maltose transport protein MAL11 && PF00083:Sugar (and other) transporter	Sugar_tr
A08407	5.27477	Contig34	126447	127322	-	876	P0CJ44.1 RecName: Full=Putative fructose-bisphosphate aldolase; Short=FBP aldolase; Short=FBPA; AltName: Full=Putative fructose-1,6-bisphosphate aldolase && PF01116:Fructose-bisphosphate aldolase class-II	F_bP_aldolase
A08010	5.24306	Contig31	106313	107368	+	993	PF13921:Myb-like DNA-binding domain	-
A08563	-4.82845	Contig36	74294	75301	+	876	-	-
A04257	5.23564	Contig1	2187439	2189276	-	1773	O13902.1 RecName: Full=Dihydroxyacetone kinase 1; Short=DHA kinase 1; AltName: Full=Glycerone kinase 1; AltName: Full=Triokinase 1; AltName: Full=Triose kinase 1 && PF02733:Dak1 domain|PF02734:DAK2 domain	-
A00496	5.2471	Contig11	196534	198380	-	1626	P49374.1 RecName: Full=High-affinity glucose transporter && PF00083:Sugar (and other) transporter	Sugar_tr
A02518	5.24635	Contig16	1125106	1126874	+	1716	A1CFM2.1 RecName: Full=FAD-linked oxidoreductase patO; AltName: Full=Patulin synthesis protein O; Flags: Precursor && PF08031:Berberine and berberine like|PF01565:FAD binding domain	FAD_binding_4
A00274	5.22401	Contig10	1669154	1670811	+	1494	E9JFX9.1 RecName: Full=Dimethyl-sulfide monooxygenase; AltName: Full=Dimethylsulfide monooxygenase large subunit && PF00296:Luciferase-like monooxygenase	-
A08357	5.22353	Contig33	510316	510806	-	390	P10282.4 RecName: Full=Guanyl-specific ribonuclease F1; Short=RNase F1; Flags: Precursor && PF00545:ribonuclease	Ribonuclease
A09033	4.50359	Contig3	1501741	1502698	+	846	PF01975:Survival protein SurE	-
A11662	5.1997	Contig5	902964	904480	+	1449	B0CQN7.1 RecName: Full=NADH-cytochrome b5 reductase 1; AltName: Full=Microsomal cytochrome b reductase && PF00173:Cytochrome b5-like Heme/Steroid binding domain|PF00970:Oxidoreductase FAD-binding domain|PF00175:Oxidoreductase NAD-binding domain	NAD_binding_1
A10020	4.54912	Contig47	72653	73853	-	1083	PF02958:Ecdysteroid kinase	-
A12075	4.52435	Contig5	2448782	2450704	+	1752	Q04800.1 RecName: Full=Ferric reductase transmembrane component 1; AltName: Full=Ferric-chelate reductase 1 && PF08022:FAD-binding domain|PF01794:Ferric reductase like transmembrane component|PF08030:Ferric reductase NAD binding domain	Ferric_reduct
A04365	5.25526	Contig1	2571792	2573871	+	1857	O61122.1 RecName: Full=Serine/threonine-protein kinase svkA; AltName: Full=Severin kinase A && PF00069:Protein kinase domain	Pkinase
A09821	5.23954	Contig42	132945	135445	-	2448	Q2U325.1 RecName: Full=Probable beta-glucosidase G; AltName: Full=Beta-D-glucoside glucohydrolase G; AltName: Full=Cellobiase G; AltName: Full=Gentiobiase G; Flags: Precursor >B8NMR5.1 RecName: Full=Probable beta-glucosidase G; AltName: Full=Beta-D-glucoside glucohydrolase G; AltName: Full=Cellobiase G; AltName: Full=Gentiobiase G; Flags: Precursor && PF14310:Fibronectin type III-like domain|PF00…	Glyco_hydro_3_C
A05678	5.20761	Contig24	836207	838949	+	2385	Q9T095.1 RecName: Full=Oligopeptide transporter 6; Short=AtOPT6 && PF03169:OPT oligopeptide transporter protein	OPT
A07056	5.23058	Contig2	1522569	1524539	-	1971	Q6MRB2.1 RecName: Full=Protein TolB; Flags: Precursor && PF07676:WD40-like Beta Propeller Repeat	PD40
A00782	-4.65944	Contig11	1522948	1524430	-	1284	C5FH26.1 RecName: Full=Metallocarboxypeptidase A-like protein MCYG_01475; Flags: Precursor && PF00246:Zinc carboxypeptidase	-
A04238	5.20263	Contig1	2139680	2141217	+	939	A7XRZ1.1 RecName: Full=Probable methyltransferase tdiE; AltName: Full=Terrequinone biosynthesis protein D && PF13489:Methyltransferase domain	-
A00447	5.19238	Contig11	65636	67351	+	1716	P38090.1 RecName: Full=General amino acid permease AGP2 && PF00324:Amino acid permease	AA_permease
A03831	5.17588	Contig1	84863	87258	+	2247	O50017.1 RecName: Full=Poly [ADP-ribose] polymerase 2; Short=PARP-2; AltName: Full=NAD(+) ADP-ribosyltransferase 2; Short=ADPRT-2; AltName: Full=Poly[ADP-ribose] synthase 2 && PF02877:Poly(ADP-ribose) polymerase, regulatory domain|PF00533:BRCA1 C Terminus (BRCT) domain|PF00644:Poly(ADP-ribose) polymerase catalytic domain|PF05406:WGR domain	WGR
A14361	4.47936	Contig9	635721	637394	-	1455	P80581.2 RecName: Full=Hexokinase && PF00349:Hexokinase|PF03727:Hexokinase	-
A12173	5.18015	Contig5	2985568	2986970	+	1257	-	-
A02347	5.15505	Contig16	192034	193925	+	1839	Q10318.1 RecName: Full=Putative dihydroxy-acid dehydratase, mitochondrial; Short=DAD; AltName: Full=2,3-dihydroxy acid hydrolyase; Flags: Precursor && PF00920:Dehydratase family	ILVD_EDD
A05856	5.19544	Contig25	690697	691549	-	735	P50197.1 RecName: Full=2,5-dichloro-2,5-cyclohexadiene-1,4-diol dehydrogenase; Short=2,5-DDOL dehydrogenase && PF00106:short chain dehydrogenase	adh_short
A01803	5.17669	Contig14	625135	625566	-	432	-	-
A10484	5.21594	Contig4	1782515	1783317	-	675	-	-
A11671	5.18861	Contig5	943114	944834	+	1548	D4B1P2.1 RecName: Full=Uncharacterized FAD-linked oxidoreductase ARB_02372; Flags: Precursor && PF01565:FAD binding domain	FAD_binding_4
A09509	5.16407	Contig3	3864901	3865512	+	612	Q96VH4.1 RecName: Full=Putative nitroreductase HBN1; AltName: Full=Homologous to bacterial nitroreductases protein 1 && PF00881:Nitroreductase family	Nitroreductase
A02446	5.16185	Contig16	711808	712414	-	402	PF08881:CVNH domain	-
A02647	5.18471	Contig17	276919	279008	-	2028	-	-
A07458	4.45498	Contig2	3129251	3129982	+	558	P30044.4 RecName: Full=Peroxiredoxin-5, mitochondrial; AltName: Full=Alu corepressor 1; AltName: Full=Antioxidant enzyme B166; Short=AOEB166; AltName: Full=Liver tissue 2D-page spot 71B; AltName: Full=PLP; AltName: Full=Peroxiredoxin V; Short=Prx-V; AltName: Full=Peroxisomal antioxidant enzyme; AltName: Full=TPx type VI; AltName: Full=Thioredoxin peroxidase PMP20; AltName: Full=Thioredoxin reduct…	-
A12271	5.12926	Contig5	3408295	3408968	-	492	P40037.1 RecName: Full=Protein HMF1; AltName: Full=High dosage growth inhibitor; AltName: Full=Homologous mitochondrial matrix factor 1 && PF01042:Endoribonuclease L-PSP	Ribonuc_L-PSP
A08513	5.17929	Contig35	52698	54977	-	1923	PF00067:Cytochrome P450	p450
novel.1060	-4.96396	Contig50	73578	74002	-	365	-	-
A12160	5.19957	Contig5	2922852	2923694	+	843	-	-
A00123	5.14751	Contig10	1118747	1121381	+	2586	P54199.2 RecName: Full=Serine/threonine-protein kinase MPS1; AltName: Full=Monopolar spindle protein 1; AltName: Full=Regulatory cell proliferation kinase 1 && PF00069:Protein kinase domain	Pkinase
A05720	5.20935	Contig24	159686	161281	-	1476	O13716.2 RecName: Full=Glucan endo-1,3-alpha-glucosidase agn1; AltName: Full=Endo-1,3-alpha-glucanase agn1; Flags: Precursor && PF03659:Glycosyl hydrolase family 71	-
A13602	5.24925	Contig8	615916	618888	+	2532	PF00172:Fungal Zn(2)-Cys(6) binuclear cluster domain|PF04082:Fungal specific transcription factor domain	Fungal_trans
A12900	-7.52364	Contig6	193292	194010	+	672	-	-
A07386	5.18114	Contig2	351480	354815	+	2742	A7EZS5.1 RecName: Full=Probable beta-galactosidase C; AltName: Full=Lactase C; Flags: Precursor && PF10435:Beta-galactosidase, domain 2|PF13364:Beta-galactosidase jelly roll domain|PF01301:Glycosyl hydrolases family 35|PF13363:Beta-galactosidase, domain 3	-
A07131	5.14415	Contig2	194948	195813	-	801	Q8NK50.1 RecName: Full=NADP-dependent mannitol dehydrogenase; Short=MtDH; AltName: Full=Mannitol 2-dehydrogenase [NADP(+)] && PF00106:short chain dehydrogenase	adh_short
A04668	4.43147	Contig1	3704219	3705321	+	750	A5H0J4.1 RecName: Full=Uracil phosphoribosyltransferase; Short=UPRTase; AltName: Full=Pyrimidine-degrading protein 16; AltName: Full=UMP pyrophosphorylase; AltName: Full=Uracil catabolism protein 6 && PF14681:Uracil phosphoribosyltransferase	-
A09105	5.1311	Contig3	1740107	1741724	+	1479	O43000.2 RecName: Full=Pantothenate transporter liz1 && PF07690:Major Facilitator Superfamily	MFS_1
A09537	5.21372	Contig3	3993193	3998332	-	3315	P17611.2 RecName: Full=Nodulation protein G && PF00106:short chain dehydrogenase	adh_short
A09184	5.1236	Contig3	2178600	2181196	+	2403	Q5AU81.1 RecName: Full=Alpha-fucosidase A; AltName: Full=Alpha-L-fucoside fucohydrolase A; Flags: Precursor && PF14498:Glycosyl hydrolase family 65, N-terminal domain	-
A03379	5.1258	Contig19	820527	822398	-	1872	PF07944:Beta-L-arabinofuranosidase, GH127	-
A00895	5.14016	Contig12	945844	947085	-	1164	-	-
A01036	5.11622	Contig12	1484244	1484721	-	417	O74238.1 RecName: Full=Protein SnodProt1; Flags: Precursor && PF07249:Cerato-platanin	-
A11544	5.15827	Contig5	20954	21610	-	657	-	-
A11518	5.13387	Contig59	96037	98739	+	2703	A7LXS9.1 RecName: Full=Beta-galactosidase BoGH2A; Short=Beta-gal; AltName: Full=Glycosyl hydrolase family protein 2A; Short=BoGH2A; Flags: Precursor && PF00703:Glycosyl hydrolases family 2|PF02837:Glycosyl hydrolases family 2, sugar binding domain|PF02836:Glycosyl hydrolases family 2, TIM barrel domain|PF16355:Domain of unknown function (DUF4982)	-
A05230	5.10087	Contig22	444010	445014	+	1005	PF13489:Methyltransferase domain	-
A02175	4.39594	Contig15	638201	639805	-	1551	O34703.1 RecName: Full=Uncharacterized ATPase YjoB && PF00004:ATPase family associated with various cellular activities (AAA)	AAA
A11099	4.39039	Contig50	133916	135869	+	1704	Q10279.2 RecName: Full=Uracil permease && PF02133:Permease for cytosine/purines, uracil, thiamine, allantoin	-
A05391	5.1018	Contig22	101913	102722	+	747	D4AM78.1 RecName: Full=Chitin deacetylase ARB_04768; Flags: Precursor && PF01522:Polysaccharide deacetylase	Polysacc_deac_1
A12411	5.16429	Contig60	137458	140143	-	2370	P40900.2 RecName: Full=Sexual differentiation process protein isp4 && PF03169:OPT oligopeptide transporter protein	OPT
A11831	5.10864	Contig5	1564556	1565853	-	915	PF13489:Methyltransferase domain	-
A02848	5.10197	Contig17	1189451	1191152	-	1641	A5G146.1 RecName: Full=Glycerol kinase; AltName: Full=ATP:glycerol 3-phosphotransferase; AltName: Full=Glycerokinase; Short=GK && PF02782:FGGY family of carbohydrate kinases, C-terminal domain|PF00370:FGGY family of carbohydrate kinases, N-terminal domain	FGGY_N
A07083	5.08141	Contig2	1625730	1631918	-	3972	P38164.2 RecName: Full=SEH-associated protein 4 && PF00300:Histidine phosphatase superfamily (branch 1)|PF17034:Zinc-ribbon like family	-
A09316	4.39635	Contig3	2807146	2808028	+	825	-	-
A12832	5.10344	Contig6	2775782	2777566	+	1356	-	-
A01520	5.13485	Contig13	1519279	1519728	+	303	-	-
A12347	5.08915	Contig5	3695135	3696939	-	1563	P07921.1 RecName: Full=Lactose permease && PF00083:Sugar (and other) transporter	Sugar_tr
A09865	5.12962	Contig42	306973	307233	-	261	-	-
A02422	5.08448	Contig16	553483	555479	+	1560	O94572.1 RecName: Full=Uncharacterized transporter C1773.15 && PF07690:Major Facilitator Superfamily	MFS_1
A08947	5.03416	Contig3	1062321	1063689	-	1119	P04397.2 RecName: Full=Bifunctional protein GAL10; Includes: RecName: Full=UDP-glucose 4-epimerase; AltName: Full=Galactowaldenase; Includes: RecName: Full=Aldose 1-epimerase; AltName: Full=Galactose mutarotase && PF16363:GDP-mannose 4,6 dehydratase	-
A08919	5.05612	Contig3	942063	943384	+	1260	PF05426:Alginate lyase	-
A07268	5.06167	Contig2	2369748	2370297	-	420	PF00436:Single-strand binding protein family	-
A05871	5.05658	Contig25	754545	755393	+	849	Q01269.2 RecName: Full=Cyclohexadienyl dehydratase; Includes: RecName: Full=Prephenate dehydratase; Includes: RecName: Full=Arogenate dehydratase; Flags: Precursor && PF00497:Bacterial extracellular solute-binding proteins, family 3	-
novel.1239	-5.48541	Contig8	425767	426104	-	338	-	-
A06190	4.39767	Contig27	480263	481890	+	1419	Q9URW9.1 RecName: Full=Putative aldehyde dehydrogenase-like protein C922.07c && PF00171:Aldehyde dehydrogenase family	Aldedh
A08930	5.06993	Contig3	1001088	1003434	+	1683	P40445.1 RecName: Full=Uncharacterized transporter YIL166C && PF07690:Major Facilitator Superfamily	MFS_1
A08429	5.04199	Contig34	224693	226318	+	1419	P49425.3 RecName: Full=Mannan endo-1,4-beta-mannosidase; AltName: Full=Endo-(1,4)-beta-mannanase && PF16990:Carbohydrate binding module (family 35)|PF02156:Glycosyl hydrolase family 26	-
A05749	5.05632	Contig25	102362	103977	-	1503	Q44470.1 RecName: Full=Putative tartrate transporter && PF07690:Major Facilitator Superfamily	MFS_1
A04493	4.99679	Contig1	3091929	3093102	+	981	Q92250.2 RecName: Full=Farnesyl pyrophosphate synthase; Short=FPP synthase; Short=FPS; AltName: Full=(2E,6E)-farnesyl diphosphate synthase; AltName: Full=Dimethylallyltranstransferase; AltName: Full=Farnesyl diphosphate synthase; AltName: Full=Geranyltranstransferase && PF00348:Polyprenyl synthetase	-
A09737	4.9868	Contig41	222379	224238	+	1560	O94342.1 RecName: Full=Probable metabolite transport protein C1271.09 && PF00083:Sugar (and other) transporter	Sugar_tr
A08945	5.03797	Contig3	1052668	1058305	-	5511	-	-
A02463	4.33865	Contig16	886394	888497	+	1821	Q9P7F2.1 RecName: Full=Copper amine oxidase 1 && PF02727:Copper amine oxidase, N2 domain|PF02728:Copper amine oxidase, N3 domain|PF01179:Copper amine oxidase, enzyme domain	-
A11397	5.01482	Contig57	31268	31702	+	435	-	-
A05937	5.0781	Contig26	223668	224549	+	882	P55336.1 RecName: Full=3-oxoacyl-[acyl-carrier-protein] reductase FabG; AltName: Full=3-ketoacyl-acyl carrier protein reductase; AltName: Full=Beta-Ketoacyl-acyl carrier protein reductase; AltName: Full=Beta-ketoacyl-ACP reductase && PF00106:short chain dehydrogenase	adh_short
A06579	5.0175	Contig29	47578	48546	+	969	D7B2S5.1 RecName: Full=L-carnitine dehydrogenase; Short=CDH; Short=L-CDH && PF00725:3-hydroxyacyl-CoA dehydrogenase, C-terminal domain|PF02737:3-hydroxyacyl-CoA dehydrogenase, NAD binding domain	3HCDH_N
A05342	5.04713	Contig22	928237	929439	+	1203	-	-
A13799	5.11781	Contig8	1483424	1483954	-	531	-	-
A10890	5.00877	Contig4	3614732	3616966	+	1950	O94469.1 RecName: Full=Probable urea active transporter 1 && PF00474:Sodium:solute symporter family	-
A05537	5.00705	Contig24	363300	365334	-	1773	Q9P6N5.1 RecName: Full=Dihydrosphingosine 1-phosphate phosphatase C823.11 && PF01569:PAP2 superfamily	-
A11235	5.01378	Contig53	82988	83275	-	228	-	-
A07117	4.98306	Contig2	1764045	1766158	+	1836	PF11001:Protein of unknown function (DUF2841)	-
A07023	5.03331	Contig2	1421725	1422667	+	855	Q6DAJ6.1 RecName: Full=Carbonic anhydrase; AltName: Full=Carbonate dehydratase; Flags: Precursor && PF00194:Eukaryotic-type carbonic anhydrase	-
A06759	4.99145	Contig2	5405986	5407452	-	1275	Q6ZSM3.2 RecName: Full=Monocarboxylate transporter 12; Short=MCT 12; AltName: Full=Creatine transporter 2; Short=CRT2; AltName: Full=Solute carrier family 16 member 12 && PF07690:Major Facilitator Superfamily	MFS_1
novel.287	4.98841	Contig14	997254	998008	-	705	-	-
A07844	4.97625	Contig30	9958	11586	-	1569	P39932.2 RecName: Full=Sugar transporter STL1 && PF00083:Sugar (and other) transporter	Sugar_tr
A11657	4.98018	Contig5	884574	885951	-	1317	Q2H1T8.1 RecName: Full=Leucine aminopeptidase 1; AltName: Full=Leucyl aminopeptidase 1; Short=LAP1; Flags: Precursor && PF04389:Peptidase family M28	-
A09617	5.0129	Contig40	60732	62318	+	1527	Q88FY6.1 RecName: Full=Putative metabolite transport protein NicT; AltName: Full=Nicotinate degradation protein T && PF07690:Major Facilitator Superfamily	MFS_1
A00277	4.98664	Contig10	1680439	1682242	+	1464	S0ENH1.1 RecName: Full=Putative aldehyde dehydrogenase FUS7; AltName: Full=Fusarin biosynthesis protein 7 && PF00171:Aldehyde dehydrogenase family	Aldedh
A07467	4.99249	Contig2	3185839	3186609	+	714	Q41359.1 RecName: Full=Pathogenesis-related protein PR-1 type; Flags: Precursor && PF00188:Cysteine-rich secretory protein family	SCP
A07316	5.00973	Contig2	2569031	2570763	+	540	Q7RXR3.1 RecName: Full=Histone H3-like centromeric protein hH3v; AltName: Full=CENP-A homolog && PF00125:Core histone H2A/H2B/H3/H4	Histone
A08854	4.96558	Contig3	669663	671813	+	2100	PF14604:Variant SH3 domain	-
A01364	4.98572	Contig13	901719	903548	+	1830	-	-
A04835	4.92956	Contig20	287971	288377	+	357	PF02671:Paired amphipathic helix repeat	PAH
A04025	4.97211	Contig1	1324679	1326263	-	1077	PF13489:Methyltransferase domain	-
A05854	4.99575	Contig25	686082	687054	-	912	T2FKR1.1 RecName: Full=Acetylesterase; AltName: Full=Carbohydrate esterase family 16 protein; Flags: Precursor && -	-
A02696	4.9644	Contig17	502273	503432	-	948	Q09751.1 RecName: Full=Lactoylglutathione lyase; AltName: Full=Aldoketomutase; AltName: Full=Glyoxalase I; Short=Glx I; AltName: Full=Ketone-aldehyde mutase; AltName: Full=Methylglyoxalase; AltName: Full=S-D-lactoylglutathione methylglyoxal lyase && PF00903:Glyoxalase/Bleomycin resistance protein/Dioxygenase superfamily	Glyoxalase
A11553	4.9658	Contig5	496139	496475	-	264	-	-
A10021	4.95126	Contig47	74981	76321	+	1176	-	-
A03836	4.98877	Contig1	649374	650479	+	975	Q5BGA7.1 RecName: Full=Probable NAD(P)H-dependent D-xylose reductase xyl1; Short=XR && PF00248:Aldo/keto reductase family	Aldo_ket_red
A03788	5.02146	Contig1	6187604	6191921	-	2886	P07921.1 RecName: Full=Lactose permease && PF01070:FMN-dependent dehydrogenase|PF00173:Cytochrome b5-like Heme/Steroid binding domain|PF00083:Sugar (and other) transporter	FMN_dh
A00869	4.94408	Contig12	803225	804311	-	1023	PF12695:Alpha/beta hydrolase family	-
A09741	4.97703	Contig41	239965	240643	+	621	-	-
A10975	4.96874	Contig4	3854897	3855601	-	705	Q0C9L6.1 RecName: Full=Methyltransferase ctvB; AltName: Full=Citreoviridin biosynthesis protein B && -	-
A02129	4.94202	Contig15	467476	468379	+	828	PF00173:Cytochrome b5-like Heme/Steroid binding domain	-
A03796	4.94776	Contig1	627071	628013	-	843	PF06912:Protein of unknown function (DUF1275)	-
A09711	4.92781	Contig41	72396	73913	-	1518	PF01757:Acyltransferase family	-
A00990	4.93	Contig12	1288749	1290297	+	1437	P38670.1 RecName: Full=Delta(14)-sterol reductase; AltName: Full=C-14 sterol reductase; AltName: Full=Sterol C14-reductase && PF01222:Ergosterol biosynthesis ERG4/ERG24 family	-
A12410	4.29957	Contig60	132229	136854	+	2181	-	-
A04239	4.95625	Contig1	2142113	2143650	+	1005	PF13489:Methyltransferase domain	-
A02622	4.92925	Contig17	197887	199442	-	1377	Q7SA23.1 RecName: Full=Exoglucanase 1; AltName: Full=1,4-beta-cellobiohydrolase 1; AltName: Full=Exocellobiohydrolase 1; Flags: Precursor && PF00840:Glycosyl hydrolase family 7	-
A03386	4.94665	Contig19	845073	845874	-	741	-	-
novel.1005	4.93034	Contig5	3146399	3147234	+	715	-	-
A10832	4.91903	Contig4	3307314	3308924	-	1611	A2QEQ6.1 RecName: Full=Beta-glucuronidase; Short=GlcAase; AltName: Full=Beta-D-glucuronoside glucuronosohydrolase; Flags: Precursor && PF16862:Glycosyl hydrolase family 79 C-terminal beta domain|PF00150:Cellulase (glycosyl hydrolase family 5)	-
A14259	4.92548	Contig9	275261	276651	-	1344	PF13472:GDSL-like Lipase/Acylhydrolase family	-
A05443	-4.07748	Contig23	261879	263853	+	1827	-	-
A03297	4.91786	Contig19	539396	540818	+	1257	PF02668:Taurine catabolism dioxygenase TauD, TfdA family	-
A11634	4.91877	Contig5	819099	820765	+	1206	Q6Z1J6.1 RecName: Full=Obg-like ATPase 1; AltName: Full=Ribosome-binding ATPase YchF; Short=OsYchF1 && PF01926:50S ribosome-binding GTPase|PF06071:Protein of unknown function (DUF933)	-
A05706	4.85678	Contig24	99025	102636	+	3612	-	-
A03081	-5.10253	Contig18	32383	33660	+	1278	PF05729:NACHT domain	NACHT
A09571	4.22568	Contig3	4214338	4216176	-	1839	Q9SR96.1 RecName: Full=DnaJ protein ERDJ3A; AltName: Full=Chaperone protein dnaJ 63; Short=AtDjA63; Short=AtJ63; AltName: Full=Endoplasmic reticulum dnaJ domain-containing protein 3A; Short=AtERdj3A; AltName: Full=Protein SCJ1 homolog ERDJ3A; AltName: Full=THERMOSENSITIVE MALE STERILE 1, TMS1; Flags: Precursor && PF00226:DnaJ domain	DnaJ
A01411	4.89848	Contig13	1115740	1117353	-	1392	PF01987:Mitochondrial biogenesis AIM24	-
A00784	-4.58574	Contig11	1528047	1529492	-	1446	-	-
A00769	4.9013	Contig11	1455270	1456757	+	1251	F1DBB3.1 RecName: Full=O-methyltransferase mpaG; AltName: Full=Mycophenolic acid synthesis protein G && PF00891:O-methyltransferase	-
A12317	5.09922	Contig5	3603128	3604264	-	1137	PF02423:Ornithine cyclodeaminase/mu-crystallin family	OCD_Mu_crystall
A11450	-5.78592	Contig58	30451	32518	+	1710	P40445.1 RecName: Full=Uncharacterized transporter YIL166C && PF07690:Major Facilitator Superfamily	MFS_1
A09735	4.88053	Contig41	197579	204902	-	3645	PF07690:Major Facilitator Superfamily|PF05368:NmrA-like family|PF06011:Transient receptor potential (TRP) ion channel	MFS_1
A02002	4.88935	Contig15	1273510	1275260	+	1632	S0EEY7.1 RecName: Full=Efflux pump FUS6; AltName: Full=Fusarin biosynthesis protein 6 && PF07690:Major Facilitator Superfamily	MFS_1
A12351	4.88914	Contig5	3706031	3707746	+	1503	B8NPT0.1 RecName: Full=Probable feruloyl esterase B-2; AltName: Full=Ferulic acid esterase B-2; Short=FAEB-2; Flags: Precursor && PF07519:Tannase and feruloyl esterase	-
A11712	4.94413	Contig5	1089058	1090671	+	1614	P94489.2 RecName: Full=Beta-xylosidase; AltName: Full=1,4-beta-D-xylan xylohydrolase; AltName: Full=Xylan 1,4-beta-xylosidase && PF04616:Glycosyl hydrolases family 43	-
A08113	4.86426	Contig32	59897	61228	-	1332	PF00246:Zinc carboxypeptidase	-
A02502	4.90506	Contig16	1056255	1057403	-	1149	P42884.1 RecName: Full=Putative aryl-alcohol dehydrogenase AAD14 && PF00248:Aldo/keto reductase family	Aldo_ket_red
A01941	4.93837	Contig14	1410719	1412538	+	1476	PF07690:Major Facilitator Superfamily	MFS_1
A06466	4.88626	Contig29	311699	313586	-	1542	A7LXT8.1 RecName: Full=Non-reducing end alpha-L-arabinofuranosidase BoGH43A; AltName: Full=Glycosyl hydrolase family protein 43A; Short=BoGH43A; Flags: Precursor && PF04616:Glycosyl hydrolases family 43	-
A03554	4.8809	Contig1	5185021	5185838	+	762	-	-
A03561	4.82825	Contig1	5212330	5221072	-	6537	P36619.2 RecName: Full=Leptomycin B resistance protein pmd1 && PF00005:ABC transporter|PF00664:ABC transporter transmembrane region|PF07673:Protein of unknown function (DUF1602)	ABC_membrane
A02354	4.90773	Contig16	254723	255716	-	909	-	-
A05703	4.86045	Contig24	86556	89720	+	3015	PF04082:Fungal specific transcription factor domain|PF00172:Fungal Zn(2)-Cys(6) binuclear cluster domain	Fungal_trans
novel.746	4.92167	Contig31	248617	249733	-	1054	-	-
A03739	4.87315	Contig1	6037748	6039330	-	1218	-	-
A03132	4.86707	Contig18	463516	464569	-	759	Q00719.1 RecName: Full=O-methyltransferase MdmC && PF01596:O-methyltransferase	-
A11078	4.17397	Contig4	647452	649513	+	1527	Q9US44.1 RecName: Full=Uncharacterized transporter C1002.16c && PF07690:Major Facilitator Superfamily	MFS_1
A02227	4.87752	Contig15	862649	863940	-	1224	-	-
A02202	4.84181	Contig15	773684	774675	-	888	Q9P5M9.1 RecName: Full=Meiotically up-regulated gene 14 protein && PF00596:Class II Aldolase and Adducin N-terminal domain	Aldolase_II
A00392	4.85771	Contig10	462264	463326	+	783	-	-
A10799	4.83922	Contig4	3193238	3193957	-	720	-	-
A09608	4.86724	Contig40	27957	29772	+	1578	P16169.3 RecName: Full=Cellodextrinase A && PF00150:Cellulase (glycosyl hydrolase family 5)	-
A12856	4.84165	Contig6	53469	58547	+	3696	Q9P6J0.1 RecName: Full=Uncharacterized transporter C1683.12 && PF04082:Fungal specific transcription factor domain|PF07690:Major Facilitator Superfamily	MFS_1
A10222	4.85893	Contig49	299359	300192	-	834	PF00561:alpha/beta hydrolase fold	Abhydrolase_1
A03352	4.87047	Contig19	749584	751399	+	1575	O74923.1 RecName: Full=Uncharacterized transporter C757.13 && PF07690:Major Facilitator Superfamily	MFS_1
A05259	4.85537	Contig22	535327	537367	+	1668	P06775.2 RecName: Full=Histidine permease && PF00324:Amino acid permease	AA_permease
A08957	4.85069	Contig3	1095030	1096685	+	1479	Q9HZQ8.1 RecName: Full=Aminopeptidase; AltName: Full=Leucine aminopeptidase; AltName: Full=PaAP; Contains: RecName: Full=Aminopeptidase AP58; Contains: RecName: Full=Aminopeptidase AP56; Contains: RecName: Full=Aminopeptidase AP28; Flags: Precursor >Q02PA2.1 RecName: Full=Aminopeptidase; AltName: Full=Leucine aminopeptidase; AltName: Full=PaAP; Flags: Precursor && PF02225:PA domain|PF04389:Peptid…	-
A14542	4.81085	Contig9	1317175	1322191	-	2748	-	-
A05659	4.89665	Contig24	755515	756450	-	936	A0QV10.1 RecName: Full=Uncharacterized oxidoreductase MSMEG_2408/MSMEI_2347 && PF00248:Aldo/keto reductase family	Aldo_ket_red
A03913	4.82793	Contig1	890695	892326	-	1527	PF09362:Domain of unknown function (DUF1996)	-
A11285	4.81219	Contig54	89272	94197	-	2802	Q59516.3 RecName: Full=Glycerate dehydrogenase; Short=GDH; AltName: Full=Glyoxylate reductase; AltName: Full=Hydroxypyruvate dehydrogenase; AltName: Full=NADH-dependent hydroxypyruvate reductase; Short=HPR; Short=HPR-A && PF00389:D-isomer specific 2-hydroxyacid dehydrogenase, catalytic domain|PF13489:Methyltransferase domain|PF02826:D-isomer specific 2-hydroxyacid dehydrogenase, NAD binding domain	2-Hacid_dh_C
A14601	4.82205	Contig9	1614458	1615598	+	870	Q54BF3.1 RecName: Full=Fumarylacetoacetate hydrolase domain-containing protein 2 homolog && PF01557:Fumarylacetoacetate (FAA) hydrolase family	FAA_hydrolase
A03106	4.81185	Contig18	363854	365119	+	1173	Q2PGG3.1 RecName: Full=Serine racemase; Short=AtSR; AltName: Full=D-serine ammonia-lyase; AltName: Full=D-serine dehydratase; AltName: Full=L-serine ammonia-lyase; AltName: Full=L-serine dehydratase && PF00291:Pyridoxal-phosphate dependent enzyme	PALP
A01930	4.80329	Contig14	1380766	1383124	+	2196	B8NM69.1 RecName: Full=Peptidase S41 family protein ustP; AltName: Full=Ustiloxin B biosynthesis protein P && -	-
A05968	4.15401	Contig26	318051	319715	+	1605	Q4WAZ6.1 RecName: Full=Multifunctional cytochrome P450 monooxygenase af510; AltName: Full=Fumagillin bioynthesis cluster P450 monooxygenase; Short=Fma-P450 && PF00067:Cytochrome P450	p450
A12597	4.89746	Contig6	1426315	1427357	-	981	P82594.1 RecName: Full=Extracellular exo-alpha-(1->5)-L-arabinofuranosidase; Short=ABF; AltName: Full=Alpha-L-AFase; AltName: Full=Extracellular arabinan exo-alpha-(1->5)-L-arabinosidase; Short=Arabinosidase; Flags: Precursor && PF04616:Glycosyl hydrolases family 43	-
A11485	4.89241	Contig58	128563	130758	+	1956	P23623.2 RecName: Full=L-amino-acid oxidase; Short=LAAO; Short=LAO; Flags: Precursor && PF01593:Flavin containing amine oxidoreductase	Amino_oxidase
A14041	4.785	Contig8	2480010	2484170	+	3837	Q9XIG1.1 RecName: Full=Sterol 3-beta-glucosyltransferase UGT80B1; AltName: Full=Protein TRANSPARENT TESTA 15; AltName: Full=UDP-glucose:sterol glucosyltransferase 80B1 && PF03033:Glycosyltransferase family 28 N-terminal domain	-
A01351	4.84914	Contig13	815365	816060	-	588	PF02627:Carboxymuconolactone decarboxylase family	CMD
A14112	4.82021	Contig8	532262	537235	+	1983	Q10CE4.1 RecName: Full=Peroxisomal (S)-2-hydroxy-acid oxidase GLO1; AltName: Full=Glycolate oxidase 1; Short=GOX 1; Short=OsGLO1; AltName: Full=Short chain alpha-hydroxy acid oxidase GLO1 >B8AKX6.1 RecName: Full=Peroxisomal (S)-2-hydroxy-acid oxidase GLO1; AltName: Full=Glycolate oxidase 1; Short=GOX 1; Short=OsGLO1; AltName: Full=Short chain alpha-hydroxy acid oxidase GLO1 && PF00106:short chain…	FMN_dh
A07455	4.12895	Contig2	3120851	3121719	+	810	-	-
A04484	4.7636	Contig1	3057213	3058872	-	1464	-	-
A14501	4.82467	Contig9	1180730	1181773	+	813	Q0TFJ7.1 RecName: Full=2-keto-3-deoxy-L-rhamnonate aldolase; Short=KDR aldolase; AltName: Full=2-dehydro-3-deoxyrhamnonate aldolase && PF03328:HpcH/HpaI aldolase/citrate lyase family	-
A03720	4.83545	Contig1	5969362	5970786	-	1425	PF02458:Transferase family	-
A09136	4.89289	Contig3	1921452	1926117	+	2721	-	-
A03045	4.84272	Contig18	1177853	1179956	-	1902	P51853.1 RecName: Full=Benzaldehyde lyase; AltName: Full=Benzoin aldolase; Short=BL; Short=BZL && PF00205:Thiamine pyrophosphate enzyme, central domain|PF02776:Thiamine pyrophosphate enzyme, N-terminal TPP binding domain|PF02775:Thiamine pyrophosphate enzyme, C-terminal TPP binding domain	TPP_enzyme_N
A08870	4.79175	Contig3	747957	750572	+	2223	P36598.2 RecName: Full=Thiamine repressible genes regulatory protein thi1; AltName: Full=Transcription factor ntf1 && PF04082:Fungal specific transcription factor domain	Fungal_trans
A08830	4.79042	Contig3	569088	570527	+	1440	O74524.1 RecName: Full=Probable proline dehydrogenase, mitochondrial; AltName: Full=Probable proline oxidase; Flags: Precursor && PF01619:Proline dehydrogenase	-
A03332	4.79826	Contig19	686689	691277	-	2502	-	-
A01231	4.79021	Contig12	638550	639832	-	1080	Q9HDX3.1 RecName: Full=AB hydrolase superfamily protein B1A11.02 && PF07859:alpha/beta hydrolase fold	Abhydrolase_3
A05213	4.7685	Contig22	396646	399925	+	3183	Q04052.1 RecName: Full=Transcriptional activator ARO80 && PF00172:Fungal Zn(2)-Cys(6) binuclear cluster domain	Zn_clus
A00766	4.78509	Contig11	1416450	1419029	-	2580	-	-
A10878	4.88466	Contig4	3565717	3568026	-	2082	Q12556.2 RecName: Full=Copper amine oxidase 1 && PF01179:Copper amine oxidase, enzyme domain	-
A13171	4.81358	Contig7	717118	719129	-	1800	Q04585.1 RecName: Full=Uncharacterized sugar kinase YDR109C && PF00370:FGGY family of carbohydrate kinases, N-terminal domain|PF02782:FGGY family of carbohydrate kinases, C-terminal domain	FGGY_N
A02609	4.79427	Contig17	142808	144224	+	1245	Q03420.1 RecName: Full=Alkaline proteinase; Short=ALP; Flags: Precursor && PF00082:Subtilase family|PF05922:Peptidase inhibitor I9	Peptidase_S8
A06096	4.85897	Contig27	129160	129657	-	498	-	-
A12677	4.75892	Contig6	1792681	1796380	-	3645	Q552M5.2 RecName: Full=Ras guanine nucleotide exchange factor Y; AltName: Full=RasGEF domain-containing protein Y && PF00617:RasGEF domain|PF00618:RasGEF N-terminal motif	-
A03232	-6.12242	Contig19	312675	313406	+	732	-	-
A00731	4.7389	Contig11	1183840	1185480	+	1077	-	-
A00112	4.76357	Contig10	40379	40854	-	279	PF05730:CFEM domain	-
A05143	4.0853	Contig21	796482	800129	-	3498	P17120.2 RecName: Full=Kinesin-like protein bimC && PF13931:Kinesin-associated microtubule-binding|PF00225:Kinesin motor domain	Kinesin
A13783	4.71708	Contig8	1403306	1405133	-	1773	N4WEA4.1 RecName: Full=3-hydroxyacyl-CoA dehydrogenase-like protein LAM1; AltName: Full=T-toxin biosynthesis protein LAM1 && PF02737:3-hydroxyacyl-CoA dehydrogenase, NAD binding domain|PF00725:3-hydroxyacyl-CoA dehydrogenase, C-terminal domain	3HCDH_N
A08021	4.76371	Contig31	142706	144873	-	1662	-	-
A03874	4.74656	Contig1	771400	772594	-	1068	-	-
A08446	4.768	Contig34	311082	311849	+	717	PF13302:Acetyltransferase (GNAT) domain	-
A09313	4.76097	Contig3	2797537	2798701	-	972	Q4WXZ5.2 RecName: Full=Ribonuclease T2-like; Short=RNase T2-like; Flags: Precursor && PF00445:Ribonuclease T2 family	Ribonuclease_T2
A05614	4.10885	Contig24	602456	603557	-	996	-	-
A02683	4.74232	Contig17	438252	439085	-	771	Q8GY96.1 RecName: Full=Phosphoglycerate mutase-like protein; Short=AtPGM && PF00300:Histidine phosphatase superfamily (branch 1)	-
A06484	4.78706	Contig29	428612	429772	-	1161	-	-
A05787	4.75924	Contig25	280863	281800	-	753	-	-
A09641	4.70138	Contig40	168023	168619	+	597	-	-
novel.626	4.74621	Contig27	188668	190710	-	1895	-	-
A03585	4.73716	Contig1	562149	564118	-	1686	-	-
A06473	4.07766	Contig29	370745	371140	+	312	-	-
novel.740	4.81704	Contig31	251396	252597	+	1116	-	-
A00641	4.72777	Contig11	797544	799874	-	2208	Q8L7W8.1 RecName: Full=Alpha-L-fucosidase 2; AltName: Full=Alpha-1,2-fucosidase 2; AltName: Full=Alpha-L-fucosidase 95A; Short=AtFuc95A; AltName: Full=Alpha-L-fucoside fucohydrolase 2; AltName: Full=Protein ALTERED XYLOGLUCAN 8; Flags: Precursor && PF14498:Glycosyl hydrolase family 65, N-terminal domain	-
novel.481	-6.56327	Contig2	4519988	4520381	-	334	-	-
A09719	4.73204	Contig41	94074	97622	-	3450	Q9HDW7.1 RecName: Full=Calcium-transporting ATPase 2 && PF00702:haloacid dehalogenase-like hydrolase|PF00122:E1-E2 ATPase|PF00689:Cation transporting ATPase, C-terminus|PF00690:Cation transporter/ATPase, N-terminus	Cation_ATPase_C
A04950	4.69455	Contig20	949353	951085	+	1563	P32466.1 RecName: Full=Low-affinity glucose transporter HXT3 && PF00083:Sugar (and other) transporter	Sugar_tr
A00427	4.74199	Contig11	18990	20377	+	1095	D4AVW3.2 RecName: Full=LysM domain-containing protein ARB_00327; Flags: Precursor && PF01476:LysM domain	LysM
A09713	4.76272	Contig41	77478	78744	-	1002	A2QV36.1 RecName: Full=Probable pectate lyase A; Flags: Precursor && PF00544:Pectate lyase	-
A04018	4.73114	Contig1	1306522	1307718	-	1197	-	-
A11982	4.72527	Contig5	2091261	2092755	-	1440	Q9HB03.2 RecName: Full=Elongation of very long chain fatty acids protein 3; AltName: Full=3-keto acyl-CoA synthase ELOVL3; AltName: Full=Cold-inducible glycoprotein of 30 kDa; AltName: Full=ELOVL fatty acid elongase 3; Short=ELOVL FA elongase 3; AltName: Full=Very long chain 3-ketoacyl-CoA synthase 3; AltName: Full=Very long chain 3-oxoacyl-CoA synthase 3 && PF01151:GNS1/SUR4 family	ELO
A09583	4.75053	Contig3	4262325	4268240	+	4212	PF12796:Ankyrin repeats (3 copies)|PF13857:Ankyrin repeats (many copies)	-
A09736	4.79699	Contig41	214696	216486	+	1692	O13968.1 RecName: Full=Uncharacterized carboxypeptidase C24C9.08 && PF01546:Peptidase family M20/M25/M40	Peptidase_M20
novel.597	4.77457	Contig25	625037	627261	-	2177	-	-
A12441	4.76236	Contig64	27843	32972	+	2796	Q10723.1 RecName: Full=Arylsulfatase; Short=AS; AltName: Full=Aryl-sulfate sulphohydrolase; Flags: Precursor && PF07690:Major Facilitator Superfamily|PF00884:Sulfatase	MFS_1
A01676	4.78798	Contig14	134676	137120	+	2445	-	-
A00712	4.7851	Contig11	1109639	1118249	+	2682	Q9P3R1.1 RecName: Full=Sterol 24-C-methyltransferase erg-4; AltName: Full=Delta(24)-sterol C-methyltransferase && PF06985:Heterokaryon incompatibility protein (HET)|PF08241:Methyltransferase domain|PF00856:SET domain|PF08498:Sterol methyltransferase C-terminal	Methyltransf_11
A13594	4.73234	Contig8	552449	553326	-	816	A3LZU7.2 RecName: Full=L-rhamnose-1-dehydrogenase && PF00106:short chain dehydrogenase	adh_short
A12429	4.72342	Contig62	32373	33600	+	1032	PF14378:PAP2 superfamily	-
A01111	4.0493	Contig12	1848848	1849844	+	759	B8M9K0.1 RecName: Full=Hydrolase tropI; AltName: Full=Tropolone synthesis protein I && PF01738:Dienelactone hydrolase family	-
A13128	4.71774	Contig7	523106	524503	+	1398	Q9UUE3.1 RecName: Full=Putative lysine N-acyltransferase C17G9.06c && PF13523:Acetyltransferase (GNAT) domain	-
A11827	4.72032	Contig5	1524890	1526235	+	1233	Q86IH1.1 RecName: Full=Homeobox protein 4; Short=DdHbx-4 && PF05920:Homeobox KN domain	Coprinus_mating
A08266	4.7474	Contig33	128696	128959	+	210	-	-
A03627	4.78294	Contig1	5484296	5485866	-	1494	P27718.2 RecName: Full=Aromatic-L-amino-acid decarboxylase; Short=AADC; AltName: Full=DOPA decarboxylase; Short=DDC && PF00282:Pyridoxal-dependent decarboxylase conserved domain	-
A01043	4.75892	Contig12	1508707	1510228	+	1293	Q5EA75.1 RecName: Full=Ethanolamine-phosphate cytidylyltransferase; AltName: Full=CTP:phosphoethanolamine cytidylyltransferase; AltName: Full=Phosphorylethanolamine transferase && PF01467:Cytidylyltransferase-like	CTP_transf_2
A08039	4.82603	Contig31	193489	194214	+	603	-	-
novel.840	-4.77118	Contig4	2847263	2847593	+	271	-	-
A01974	4.71501	Contig14	1500910	1502760	-	1683	Q05998.1 RecName: Full=Thiamine transporter && PF02133:Permease for cytosine/purines, uracil, thiamine, allantoin	-
A08301	4.75436	Contig33	249292	250534	+	1029	-	-
A06296	4.71718	Contig28	378561	384362	+	3177	Q8J0E9.1 RecName: Full=Isopenicillin N epimerase component 1; Short=IPN epimerase component 1; AltName: Full=Isopenicillin N epimerase acyl-CoA synthase component && PF13637:Ankyrin repeats (many copies)|PF00501:AMP-binding enzyme	AMP-binding
A09188	4.69192	Contig3	2219053	2222709	-	3657	PF14636:Folliculin-interacting protein N-terminus	-
A00005	4.73326	Contig10	604851	606219	-	1215	B8NM72.1 RecName: Full=Cysteine desulfurase-like protein ustD; AltName: Full=Ustiloxin B biosynthesis protein D && PF00266:Aminotransferase class-V	Aminotran_5
A07097	4.64323	Contig2	1687776	1689078	+	1185	O59790.2 RecName: Full=Serine/threonine-protein kinase ark1; AltName: Full=Aurora-related kinase 1 && PF00069:Protein kinase domain	Pkinase
A10042	4.71187	Contig47	182888	186036	+	2436	O23482.3 RecName: Full=Oligopeptide transporter 3; Short=AtOPT3 && PF03169:OPT oligopeptide transporter protein	OPT
A06606	4.67329	Contig2	4741421	4742249	+	780	PF13472:GDSL-like Lipase/Acylhydrolase family	-
A10120	4.66913	Contig48	221652	222841	+	1140	P10967.1 RecName: Full=1-aminocyclopropane-1-carboxylate oxidase homolog; AltName: Full=Protein E8 && PF14226:non-haem dioxygenase in morphine synthesis N-terminal|PF03171:2OG-Fe(II) oxygenase superfamily	2OG-FeII_Oxy
A09539	4.70276	Contig3	4001772	4002823	+	1002	PF08450:SMP-30/Gluconolaconase/LRE-like region	-
A14138	4.63677	Contig9	1991426	1992352	+	807	-	-
A07721	4.76251	Contig2	4269727	4270319	+	477	PF13857:Ankyrin repeats (many copies)	-
A03945	4.65544	Contig1	1046531	1048385	-	1641	Q9C101.1 RecName: Full=Uncharacterized MFS-type transporter PB1E7.08c && PF07690:Major Facilitator Superfamily	MFS_1
A14150	4.67099	Contig9	2056063	2057986	+	1704	A1CFM2.1 RecName: Full=FAD-linked oxidoreductase patO; AltName: Full=Patulin synthesis protein O; Flags: Precursor && PF08031:Berberine and berberine like|PF01565:FAD binding domain	FAD_binding_4
A11215	4.65959	Contig52	213590	215221	+	1632	-	-
A12417	4.78738	Contig61	60885	61777	-	690	-	-
A06729	4.70655	Contig2	5319185	5320753	+	1569	A1DMV3.1 RecName: Full=Probable feruloyl esterase B-2; AltName: Full=Ferulic acid esterase B-2; Short=FAEB-2; Flags: Precursor && PF07519:Tannase and feruloyl esterase	-
A01395	4.64755	Contig13	1070973	1072148	-	1176	PF00782:Dual specificity phosphatase, catalytic domain	DSPc
A02451	4.68461	Contig16	724387	726210	+	1584	Q12612.1 RecName: Full=Trichodiene oxygenase; AltName: Full=Cytochrome P450 58 && PF00067:Cytochrome P450	p450
A11276	4.65999	Contig54	46806	48461	+	1230	PF08450:SMP-30/Gluconolaconase/LRE-like region	-
A01576	4.75585	Contig13	1801705	1802814	+	1110	Q12535.1 RecName: Full=Pectinesterase; Short=PE; AltName: Full=Pectin methylesterase; Flags: Precursor && PF01095:Pectinesterase	-
A05857	4.6288	Contig25	692865	694018	+	1092	A1RYE4.1 RecName: Full=Glyoxylate reductase && PF02826:D-isomer specific 2-hydroxyacid dehydrogenase, NAD binding domain	2-Hacid_dh_C
A01011	4.62764	Contig12	1358493	1361387	+	1932	Q9P6I2.2 RecName: Full=Cys-Gly metallodipeptidase dug1; AltName: Full=GSH degradosomal complex subunit DUG1 && PF01546:Peptidase family M20/M25/M40|PF07687:Peptidase dimerisation domain	Peptidase_M20
A06998	4.6245	Contig2	116556	117700	-	921	P59911.1 RecName: Full=Ubiquinone/menaquinone biosynthesis C-methyltransferase UbiE; AltName: Full=2-methoxy-6-polyprenyl-1,4-benzoquinol methylase; AltName: Full=Demethylmenaquinone methyltransferase && PF13847:Methyltransferase domain	-
A08822	4.64766	Contig3	546415	547666	+	1182	Q5UQ83.1 RecName: Full=Putative alpha/beta hydrolase R526 && PF07859:alpha/beta hydrolase fold	Abhydrolase_3
A09050	4.66028	Contig3	1551210	1552770	-	1434	P54781.1 RecName: Full=Cytochrome P450 61; AltName: Full=C-22 sterol desaturase && PF00067:Cytochrome P450	p450
A02128	4.62018	Contig15	463967	465922	-	1893	-	-
A06591	4.61608	Contig29	88588	89217	+	630	Q5AW46.1 RecName: Full=Uncharacterized protein AN7484 && PF07081:Protein of unknown function (DUF1349)	-
A02658	4.66972	Contig17	334410	335969	-	1560	A1CTK4.1 RecName: Full=Probable feruloyl esterase B; AltName: Full=Ferulic acid esterase B; Short=FAEB; Flags: Precursor && PF07519:Tannase and feruloyl esterase	-
A04406	4.62377	Contig1	2744787	2745230	-	321	PF05032:Spo12 family	-
A01940	4.64007	Contig14	1407909	1409461	-	1386	PF01266:FAD dependent oxidoreductase	DAO
A06390	4.66091	Contig28	711354	712904	-	1323	-	-
A05360	4.62558	Contig22	975408	976599	+	897	Q84UV8.1 RecName: Full=Bifunctional monodehydroascorbate reductase and carbonic anhydrase nectarin-3; AltName: Full=Nectarin-III; Contains: RecName: Full=Nectarin-2; Flags: Precursor && PF00194:Eukaryotic-type carbonic anhydrase	-
A07574	4.61349	Contig2	3675765	3677349	+	1059	PF13489:Methyltransferase domain	-
A12608	4.67501	Contig6	1463419	1463994	-	576	Q5T1C6.1 RecName: Full=Acyl-coenzyme A thioesterase THEM4; Short=Acyl-CoA thioesterase THEM4; AltName: Full=Carboxyl-terminal modulator protein; AltName: Full=Thioesterase superfamily member 4; Flags: Precursor && PF03061:Thioesterase superfamily	4HBT
A14123	4.65741	Contig9	1906404	1907318	+	915	-	-
A07647	-4.90363	Contig2	3941610	3943396	+	1740	Q9SHY2.1 RecName: Full=Probable metal-nicotianamine transporter YSL7; AltName: Full=Protein YELLOW STRIPE LIKE 7; Short=AtYSL7 && PF03169:OPT oligopeptide transporter protein	OPT
A08455	4.73799	Contig34	358102	364241	+	3534	PF00350:Dynamin family	-
A14473	4.57255	Contig9	1104803	1106007	-	1152	O77769.1 RecName: Full=Short-chain dehydrogenase/reductase 3; AltName: Full=Retinal short-chain dehydrogenase/reductase 1; Short=retSDR1 && PF00106:short chain dehydrogenase	adh_short
A03019	4.61794	Contig18	114957	122493	+	2346	-	-
A09201	4.56763	Contig3	2273946	2276620	+	2481	PF13854:Kelch motif	-
A00398	4.60217	Contig10	494038	497720	+	2589	-	-
A13902	4.63709	Contig8	1989198	1990334	-	1035	PF06985:Heterokaryon incompatibility protein (HET)	-
A09862	4.59912	Contig42	298479	299772	+	768	Q5B024.2 RecName: Full=Probable pectate lyase F; Flags: Precursor && PF03211:Pectate lyase	-
A13736	4.63261	Contig8	1107753	1108946	+	1038	P42882.1 RecName: Full=4-amino-5-hydroxymethyl-2-methylpyrimidine phosphate synthase; Short=HMP-P synthase; Short=Hydroxymethylpyrimidine phosphate synthase; AltName: Full=Thiamine pyrimidine synthase [Aspergillus parasiticus] && PF09084:NMT1/THI5 like	-
A04215	4.6268	Contig1	2067964	2070079	-	2013	Q24238.3 RecName: Full=Alkaline phosphatase 4; Flags: Precursor && PF00245:Alkaline phosphatase	-
A14233	4.55911	Contig9	195197	196259	-	606	P13434.1 RecName: Full=Transcriptional activator HAP3; AltName: Full=UAS2 regulatory protein A && PF00808:Histone-like transcription factor (CBF/NF-Y) and archaeal histone	-
A05530	4.64847	Contig24	307438	311122	-	2427	Q0D1P7.1 RecName: Full=NAD-dependent epimerase/dehydratase terH; AltName: Full=Terrein biosynthesis cluster protein terH && PF01370:NAD dependent epimerase/dehydratase family|PF07690:Major Facilitator Superfamily	MFS_1
A01134	4.6872	Contig12	130172	131333	-	747	PF11807:Domain of unknown function (DUF3328)	-
A03842	4.6299	Contig1	89454	90752	+	1182	PF12311:Protein of unknown function (DUF3632)	-
A09165	4.63792	Contig3	2111696	2114116	+	2088	D4B093.1 RecName: Full=Secreted protein ARB_01864; Flags: Precursor && PF00149:Calcineurin-like phosphoesterase	Metallophos
A05504	4.66361	Contig24	223700	225342	-	1356	Q5EXK1.1 RecName: Full=3-hydroxybenzoate 6-hydroxylase && PF01494:FAD binding domain	FAD_binding_3
A00288	4.74663	Contig10	1707990	1709556	+	1332	-	-
A07864	4.69773	Contig30	96344	99413	+	2628	P40900.2 RecName: Full=Sexual differentiation process protein isp4 && PF03169:OPT oligopeptide transporter protein	OPT
A01413	4.61691	Contig13	86091	87405	-	1248	PF00775:Dioxygenase	-
A00750	4.59298	Contig11	1363155	1364875	+	1515	Q9US37.1 RecName: Full=Uncharacterized transporter C1039.04 && PF07690:Major Facilitator Superfamily	MFS_1
A00985	4.56987	Contig12	1274052	1275224	+	1092	Q00446.1 RecName: Full=Endopolygalacturonase 1; AltName: Full=Clpg1; AltName: Full=Pectinase; Flags: Precursor [Colletotrichum lindemuthianum] && PF00295:Glycosyl hydrolases family 28	-
A05967	4.58445	Contig26	314890	316140	-	1194	D4APQ6.1 RecName: Full=Probable thioredoxin reductase ARB_06224; Flags: Precursor && PF07992:Pyridine nucleotide-disulphide oxidoreductase	Pyr_redox_2
A05991	4.57363	Contig26	504135	505761	-	1359	A2QQV6.1 RecName: Full=Probable quinate permease; AltName: Full=Quinate transporter && PF00083:Sugar (and other) transporter	Sugar_tr
A04096	4.58808	Contig1	1611233	1611970	+	738	-	-
A06360	4.62176	Contig28	606435	607211	-	777	-	-
A08092	4.52496	Contig31	63935	66074	+	2085	O42633.1 RecName: Full=Fatty acid transporter protein && PF13193:AMP-binding enzyme C-terminal domain|PF00501:AMP-binding enzyme	AMP-binding
A04688	4.58053	Contig1	3931780	3933666	+	1749	-	-
A09520	4.56067	Contig3	3919388	3923353	-	3966	-	-
A04812	4.56484	Contig20	150094	152776	+	2640	-	-
A10274	4.54026	Contig4	106652	107494	-	726	P36981.2 RecName: Full=Mating-type protein a-1; Short=Mt a-1 [Neurospora crassa] && PF00505:HMG (high mobility group) box	HMG_box
A01721	4.55584	Contig14	260731	261690	-	960	-	-
A04534	4.52393	Contig1	3221979	3223765	+	1734	Q12756.2 RecName: Full=Kinesin-like protein KIF1A; AltName: Full=Axonal transporter of synaptic vesicles; AltName: Full=Microtubule-based motor KIF1A; AltName: Full=Unc-104- and KIF1A-related protein; Short=hUnc-104 && PF00225:Kinesin motor domain	Kinesin
A05988	4.57006	Contig26	467933	469705	+	1773	P39980.1 RecName: Full=Siderophore iron transporter 1; AltName: Full=Ferrioxamine B permease; AltName: Full=Siderophore iron transporter ARN3 && PF07690:Major Facilitator Superfamily	MFS_1
A03404	-5.09933	Contig19	902942	904426	+	1383	-	-
A11109	4.59686	Contig50	164836	165363	-	528	-	-
A09870	4.53206	Contig42	318313	319032	+	606	Q9P403.1 RecName: Full=Intracellular hyphae protein 1; Flags: Precursor && PF01476:LysM domain	LysM
A12404	4.55584	Contig60	96532	97829	-	1245	O34559.1 RecName: Full=Unsaturated rhamnogalacturonyl hydrolase YteR; Short=URH && PF07470:Glycosyl Hydrolase Family 88	-
A11980	4.55249	Contig5	2074516	2078986	+	4335	Q28689.1 RecName: Full=Canalicular multispecific organic anion transporter 1; AltName: Full=ATP-binding cassette sub-family C member 2; AltName: Full=Canalicular multidrug resistance protein; AltName: Full=Epithelial basolateral chloride conductance regulator; AltName: Full=Multidrug resistance-associated protein 2 && PF00664:ABC transporter transmembrane region|PF00005:ABC transporter	ABC_membrane
A10636	4.53491	Contig4	2525644	2527325	+	1494	P42041.2 RecName: Full=Aldehyde dehydrogenase; Short=ALDDH; Short=ALDH; AltName: Full=Allergen Alt a X; AltName: Allergen=Alt a 10 && PF00171:Aldehyde dehydrogenase family	Aldedh
A12833	4.57354	Contig6	2780054	2781339	+	1074	-	-
A01529	-5.67438	Contig13	1541210	1542646	-	1437	PF04082:Fungal specific transcription factor domain	Fungal_trans
novel.291	4.49007	Contig15	251471	254837	+	3134	-	-
A11117	-4.05991	Contig50	202856	204272	+	1320	Q9HDX2.1 RecName: Full=Uncharacterized lactate 2-monooxygenase PB1A11.03 && PF01070:FMN-dependent dehydrogenase	FMN_dh
A08346	4.57693	Contig33	370367	380997	+	5058	Q9P6J0.1 RecName: Full=Uncharacterized transporter C1683.12 && PF00106:short chain dehydrogenase|PF01425:Amidase|PF07690:Major Facilitator Superfamily	adh_short
A11866	4.52719	Contig5	271814	273172	-	1305	-	-
A06058	4.47574	Contig26	780505	784722	+	2952	PF04828:Glutathione-dependent formaldehyde-activating enzyme	-
A06890	4.54972	Contig2	718118	719611	+	1440	PF00246:Zinc carboxypeptidase	-
A13945	4.62545	Contig8	316744	318680	-	1713	B3FWT8.1 RecName: Full=Efflux pump rdc3; AltName: Full=Hypothemycin biosynthesis cluster protein rdc3 && PF07690:Major Facilitator Superfamily	MFS_1
A06041	4.54917	Contig26	675159	681291	-	573	PF08881:CVNH domain	-
A04363	4.53906	Contig1	2565667	2569730	-	3996	O14302.1 RecName: Full=cytokinesis protein 3 && PF07653:Variant SH3 domain|PF01841:Transglutaminase-like superfamily	Transglut_core
A09889	4.51008	Contig42	61264	62815	-	1347	PF05730:CFEM domain	-
A05118	4.53287	Contig21	662383	663282	-	900	O34893.1 RecName: Full=Putative enoyl-CoA hydratase/isomerase YngF && PF00378:Enoyl-CoA hydratase/isomerase	ECH
A05322	4.53342	Contig22	837722	839528	-	1596	D4B5F9.2 RecName: Full=Probable peptidoglycan-N-acetylglucosamine deacetylase ARB_03699; Short=Peptidoglycan GlcNAc deacetylase; AltName: Full=Peptidoglycan N-deacetylase; Short=PG N-deacetylase; Flags: Precursor && PF01522:Polysaccharide deacetylase|PF00187:Chitin recognition protein	Polysacc_deac_1
A00689	4.53671	Contig11	1003262	1003676	+	282	-	-
A08848	4.53828	Contig3	625704	627312	-	1551	Q06266.1 RecName: Full=Protein TOS4; AltName: Full=Target of SBF protein 4 && -	-
A06272	4.54234	Contig28	239279	240659	-	1332	Q88FY2.1 RecName: Full=6-hydroxynicotinate 3-monooxygenase; Short=6HNA monooxygenase; AltName: Full=Nicotinate degradation protein C; Flags: Precursor && PF01494:FAD binding domain	FAD_binding_3
A03686	4.48708	Contig1	5723014	5724362	-	1293	H8WR05.1 RecName: Full=Beta-phenylalanine transaminase; AltName: Full=Aromatic beta-amino acid aminotransferase; AltName: Full=Beta-phenylalanine aminotransferase; AltName: Full=VpAT && PF00202:Aminotransferase class-III	Aminotran_3
A10880	4.63664	Contig4	3575245	3577255	+	1587	Q8VCW8.1 RecName: Full=Acyl-CoA synthetase family member 2, mitochondrial; Flags: Precursor && PF00501:AMP-binding enzyme|PF13193:AMP-binding enzyme C-terminal domain	AMP-binding
A08022	4.4912	Contig31	147010	149472	+	2076	P50276.1 RecName: Full=High-affinity methionine permease && PF13520:Amino acid permease	-
A09943	4.49381	Contig44	157877	158608	-	732	-	-
A02467	4.48238	Contig16	900075	901206	+	885	G2QJ27.1 RecName: Full=Acetylesterase; AltName: Full=Carbohydrate esterase family 16 protein; Flags: Precursor && -	-
A02486	-4.66236	Contig16	996096	997550	+	1455	P49374.1 RecName: Full=High-affinity glucose transporter && PF00083:Sugar (and other) transporter	Sugar_tr
A13029	-4.37583	Contig7	108761	109177	+	417	-	-
A12292	4.50034	Contig5	3496590	3497867	-	1278	-	-
A01076	4.48886	Contig12	1684040	1687934	-	2961	G3Y424.1 RecName: Full=FAD-dependent monooxygenase yanF; AltName: Full=Yanuthone D synthesis protein F && PF01565:FAD binding domain	FAD_binding_4
A03941	4.60561	Contig1	1037930	1041098	-	2976	PF04082:Fungal specific transcription factor domain	Fungal_trans
A08265	4.49134	Contig33	125141	127073	-	1830	PF00069:Protein kinase domain	Pkinase
A06448	4.53516	Contig29	253751	255950	-	2070	Q9URY8.1 RecName: Full=Probable sulfate permease C869.05c && PF01740:STAS domain|PF00916:Sulfate permease family	Sulfate_transp
A00858	4.48098	Contig12	772375	773284	+	852	G3YG17.1 RecName: Full=L-xylulose reductase && PF00106:short chain dehydrogenase	adh_short
A01179	4.48825	Contig12	416258	417440	+	1017	Q9UUN9.3 RecName: Full=Aldehyde reductase 2; AltName: Full=Aldehyde reductase II; Short=ARII && PF01370:NAD dependent epimerase/dehydratase family	Epimerase
A07039	4.497	Contig2	1462609	1463731	+	1062	PF03435:Saccharopine dehydrogenase NADP binding domain	Saccharop_dh
A00149	4.52318	Contig10	1226459	1230583	+	4125	PF08578:Protein of unknown function (DUF1765)	-
novel.166	4.50627	Contig11	458873	459418	-	493	-	-
A06754	4.52714	Contig2	5386419	5387223	+	756	Q9LBG2.1 RecName: Full=Levodione reductase; AltName: Full=(6R)-2,2,6-trimethyl-1,4-cyclohexanedione reductase && PF00106:short chain dehydrogenase	adh_short
A03548	-4.09396	Contig1	5122244	5123029	+	786	-	-
A01383	4.46838	Contig13	1032502	1033955	+	1077	Q9UTI0.1 RecName: Full=Probable dihydroorotase; Short=DHOase && PF01979:Amidohydrolase family	Amidohydro_1
A05584	4.44226	Contig24	510897	516515	+	5487	Q6FT12.1 RecName: Full=Guanine nucleotide exchange factor LTE1 && PF00618:RasGEF N-terminal motif|PF00617:RasGEF domain	-
A04924	4.4471	Contig20	824792	826051	-	1101	A9HYZ1.1 RecName: Full=Transaldolase && PF00923:Transaldolase	-
A03950	4.43938	Contig1	1058317	1060019	-	1476	Q9US37.1 RecName: Full=Uncharacterized transporter C1039.04 && PF07690:Major Facilitator Superfamily	MFS_1
A06715	4.44498	Contig2	5240676	5243032	-	2307	Q7Z9M8.1 RecName: Full=Xyloglucanase; Short=XG; AltName: Full=Cel74a; Flags: Precursor && -	-
A05677	4.43276	Contig24	827451	829203	+	1557	O94342.1 RecName: Full=Probable metabolite transport protein C1271.09 && PF00083:Sugar (and other) transporter	Sugar_tr
A09809	4.45482	Contig42	92556	93887	+	1332	-	-
A01884	4.54769	Contig14	1152734	1155201	+	2307	P40483.1 RecName: Full=Putative zinc metalloproteinase YIL108W && PF12044:Putative peptidase family	-
A11517	4.44771	Contig59	93773	94975	+	1140	-	-
A13162	4.53189	Contig7	663156	664387	+	1113	A0A024SMV2.1 RecName: Full=D-xylose 1-dehydrogenase (NADP(+)); Short=XDH; AltName: Full=D-xylose-NADP dehydrogenase; AltName: Full=NADP(+)-dependent D-xylose dehydrogenase && PF01408:Oxidoreductase family, NAD-binding Rossmann fold	GFO_IDH_MocA
A10884	4.44519	Contig4	424858	425954	-	912	Q05918.1 RecName: Full=Tyrosine-protein phosphatase; Flags: Precursor && PF13350:Tyrosine phosphatase family|PF13348:Tyrosine phosphatase family C-terminal region	-
A12688	4.47573	Contig6	1869682	1871417	-	1686	-	-
A10206	4.53875	Contig49	222889	224007	-	1119	A7XRZ1.1 RecName: Full=Probable methyltransferase tdiE; AltName: Full=Terrequinone biosynthesis protein D && PF13489:Methyltransferase domain	-
A12919	4.43728	Contig6	251541	253616	+	2076	-	-
novel.220	-5.89346	Contig13	518941	520549	+	1609	-	-
A01705	4.43091	Contig14	215171	216903	+	1488	O43000.2 RecName: Full=Pantothenate transporter liz1 && PF07690:Major Facilitator Superfamily	MFS_1
A09098	4.49218	Contig3	1721562	1724514	-	2787	P29141.1 RecName: Full=Minor extracellular protease vpr; Flags: Precursor && PF06280:Fn3-like domain|PF00082:Subtilase family	Peptidase_S8
A07978	4.42486	Contig30	532595	535285	-	2310	Q94464.2 RecName: Full=Dynamin-A && PF01031:Dynamin central region|PF00350:Dynamin family	-
A08644	4.41549	Contig38	304111	304593	-	483	-	-
A12015	-5.36153	Contig5	2210523	2213180	+	2658	-	-
A02314	4.41589	Contig16	52875	56585	-	3525	PF00004:ATPase family associated with various cellular activities (AAA)	AAA
A09505	4.42371	Contig3	3819456	3821082	-	1266	-	-
A06268	4.46862	Contig28	223864	225257	-	1050	PF13489:Methyltransferase domain	-
A13165	4.4298	Contig7	679409	680404	+	723	Q10235.1 RecName: Full=Cell polarity protein alp11; AltName: Full=Altered polarity protein 11 && PF01302:CAP-Gly domain|PF14560:Ubiquitin-like domain	-
A10108	4.41526	Contig48	179242	180723	-	1482	-	-
A09421	4.45762	Contig3	3350519	3351698	-	1002	B6H9U8.1 RecName: Full=Secondary metabolism regulator laeA; AltName: Full=Methyltransferase laeA; AltName: Full=Velvet complex subunit laeA && PF13489:Methyltransferase domain	-
A00489	4.4028	Contig11	173363	181236	-	3918	P08703.1 RecName: Full=Isopenicillin N synthase; Short=IPNS && PF14226:non-haem dioxygenase in morphine synthesis N-terminal|PF03171:2OG-Fe(II) oxygenase superfamily	2OG-FeII_Oxy
A03819	4.40461	Contig1	6414469	6419495	-	2247	PF04082:Fungal specific transcription factor domain	Fungal_trans
A03302	4.39536	Contig19	559105	559942	+	606	-	-
A09533	4.43087	Contig3	3967781	3969775	-	1995	PF05592:Bacterial alpha-L-rhamnosidase	-
A10569	4.46513	Contig4	2195555	2199265	-	2928	PF00931:NB-ARC domain|PF13424:Tetratricopeptide repeat	NB-ARC
A13800	4.42511	Contig8	258396	259801	-	1347	Q6JQN1.1 RecName: Full=Acyl-CoA dehydrogenase family member 10; Short=ACAD-10 && PF02771:Acyl-CoA dehydrogenase, N-terminal domain|PF00441:Acyl-CoA dehydrogenase, C-terminal domain|PF02770:Acyl-CoA dehydrogenase, middle domain	-
A14444	4.58315	Contig9	997962	999619	+	1404	D4AUF4.1 RecName: Full=WSC domain-containing protein ARB_07870; Flags: Precursor && PF00141:Peroxidase	-
A00890	4.45308	Contig12	908750	913423	-	2370	PF13191:AAA ATPase domain	-
A01012	-6.96689	Contig12	1361926	1363802	-	1767	PF07690:Major Facilitator Superfamily	MFS_1
A11303	4.35715	Contig54	151111	153078	+	1356	Q9URY7.1 RecName: Full=Putative formamidase C869.04; AltName: Full=Formamide amidohydrolase && PF03069:Acetamidase/Formamidase family	FmdA_AmdA
A01323	4.43682	Contig13	694037	695653	-	1443	PF01266:FAD dependent oxidoreductase	DAO
A00931	4.36204	Contig12	1107583	1109046	-	1389	Q9US35.1 RecName: Full=D-serine dehydratase; AltName: Full=D-serine deaminase; Short=DSD && PF01168:Alanine racemase, N-terminal domain|PF14031:Putative serine dehydratase domain	Ala_racemase_N
A08268	4.37344	Contig33	132788	134167	-	1380	Q8JZZ0.2 RecName: Full=UDP-glucuronosyltransferase 3A2; Short=UDPGT 3A2; Flags: Precursor && PF00201:UDP-glucoronosyl and UDP-glucosyl transferase	UDPGT
A08466	4.35837	Contig34	393318	394549	-	1119	-	-
A02989	4.37422	Contig18	1027673	1030396	-	2724	PF13532:2OG-Fe(II) oxygenase superfamily|PF14497:Glutathione S-transferase, C-terminal domain|PF00857:Isochorismatase family	Isochorismatase
A13654	4.46517	Contig8	780104	780417	+	204	-	-
A12313	4.40093	Contig5	3588769	3590092	-	1224	PF14027:Protein of unknown function (DUF4243)	-
A03227	4.36718	Contig19	303633	303931	-	246	PF07876:Stress responsive A/B Barrel Domain	-
A02730	4.36591	Contig17	646262	650841	-	4347	PF05729:NACHT domain	NACHT
A12210	4.37124	Contig5	56104	56987	+	744	PF00117:Glutamine amidotransferase class-I	GATase
A06592	4.38931	Contig29	89639	90539	-	774	-	-
A02286	4.34535	Contig15	1079826	1083818	-	2568	P9WK86.1 RecName: Full=Carboxylesterase NlhH >P9WK87.1 RecName: Full=Carboxylesterase NlhH && PF07859:alpha/beta hydrolase fold	Abhydrolase_3
A13511	4.37954	Contig7	2313431	2318269	-	4839	-	-
A04723	4.38851	Contig1	4123421	4124112	-	639	Q10215.2 RecName: Full=Putative thiosulfate sulfurtransferase, mitochondrial; AltName: Full=Rhodanese-like protein; Flags: Precursor && PF00581:Rhodanese-like domain	Rhodanese
A03009	4.35545	Contig18	1081372	1082164	+	669	PF00170:bZIP transcription factor	bZIP_1
A10597	4.34564	Contig4	2340068	2345973	-	2013	PF00004:ATPase family associated with various cellular activities (AAA)	AAA
A07164	4.47276	Contig2	201626	203453	+	1572	Q4WAZ6.1 RecName: Full=Multifunctional cytochrome P450 monooxygenase af510; AltName: Full=Fumagillin bioynthesis cluster P450 monooxygenase; Short=Fma-P450 && PF00067:Cytochrome P450	p450
A09077	4.33918	Contig3	1665960	1669938	-	2121	P38364.1 RecName: Full=Pisatin demethylase; AltName: Full=Cytochrome P450 57A2 && PF00106:short chain dehydrogenase|PF00067:Cytochrome P450	p450
A11391	4.38003	Contig56	186325	187474	+	1041	G0RNN3.2 RecName: Full=Secondary metabolism regulator LAE1; AltName: Full=Methyltransferase LAE1; AltName: Full=Velvet complex subunit LAE1 && PF13489:Methyltransferase domain	-
A05629	4.29666	Contig24	657380	658993	-	1614	PF12697:Alpha/beta hydrolase family	-
A08824	4.338	Contig3	550757	553043	+	621	PF14534:Domain of unknown function (DUF4440)	-
A12638	4.48947	Contig6	1559617	1563404	-	1005	Q5B037.2 RecName: Full=Acetylxylan esterase A; Flags: Precursor && PF10503:Esterase PHB depolymerase	-
A08828	4.35181	Contig3	563128	565115	+	1746	Q9P7Q9.1 RecName: Full=Alpha-1,2-mannosyltransferase alg9; AltName: Full=Asparagine-linked glycosylation protein 9; AltName: Full=Dol-P-Man:Man(6)GlcNAc(2)-PP-Dol alpha-1,2-mannosyltransferase; AltName: Full=Dol-P-Man:Man(8)GlcNAc(2)-PP-Dol alpha-1,2-mannosyltransferase; Flags: Precursor && PF03901:Alg9-like mannosyltransferase family	Glyco_transf_22
novel.131	-4.21278	Contig10	1997553	1997972	+	420	-	-
A14331	4.33302	Contig9	529970	531748	+	1647	Q08806.1 RecName: Full=Alpha-amylase 2; AltName: Full=1,4-alpha-D-glucan glucanohydrolase 2; Flags: Precursor && PF09260:Domain of unknown function (DUF1966)|PF00128:Alpha amylase, catalytic domain	-
A03199	4.32768	Contig19	199551	200755	-	1155	PF07859:alpha/beta hydrolase fold	Abhydrolase_3
novel.1140	4.42531	Contig60	88285	89842	-	1426	-	-
A06810	4.31618	Contig2	5671472	5673457	-	1827	Q9SVU0.1 RecName: Full=Probable indole-3-pyruvate monooxygenase YUCCA8; AltName: Full=Flavin-containing monooxygenase YUCCA8 && PF13738:Pyridine nucleotide-disulphide oxidoreductase	-
A06866	4.31223	Contig2	5886494	5891817	+	1251	A5PMF6.1 RecName: Full=Procollagen galactosyltransferase 1; AltName: Full=Collagen beta(1-O)galactosyltransferase 1; AltName: Full=Glycosyltransferase 25 family member 1; AltName: Full=Hydroxylysine galactosyltransferase 1; Flags: Precursor && PF01755:Glycosyltransferase family 25 (LPS biosynthesis protein)	-
A00968	4.33793	Contig12	1227203	1227809	-	558	PF06140:Interferon-induced 6-16 family	-
A05277	4.32572	Contig22	628693	632257	+	3117	Q9FIY7.1 RecName: Full=Putative SWI/SNF-related matrix-associated actin-dependent regulator of chromatin subfamily A member 3-like 3; Short=SMARCA3-like protein 3 && PF00271:Helicase conserved C-terminal domain|PF00176:SNF2 family N-terminal domain	SNF2_N
A04761	4.3251	Contig1	4427672	4428854	-	873	PF00583:Acetyltransferase (GNAT) family	Acetyltransf_1
A14349	4.32115	Contig9	584915	586786	-	1815	P41411.1 RecName: Full=Cell division control protein 18 && PF13401:AAA domain	-
A05290	4.30651	Contig22	667947	669516	+	1503	PF07632:Protein of unknown function (DUF1593)	-
A08273	4.43551	Contig33	152645	155226	-	1728	PF14269:Arylsulfotransferase (ASST)	-
A08891	4.29716	Contig3	822714	823835	+	1071	PF00561:alpha/beta hydrolase fold	Abhydrolase_1
A09834	4.321	Contig42	44665	46433	-	1662	P38156.1 RecName: Full=Maltose permease MAL31; AltName: Full=Maltose transport protein MAL31 && PF00083:Sugar (and other) transporter	Sugar_tr
A07773	4.29401	Contig2	4413866	4416427	-	1740	-	-
A02476	-4.37047	Contig16	934047	935923	+	1776	-	-
A06048	4.31695	Contig26	729729	737808	+	4197	Q0D1P1.1 RecName: Full=FAD-dependent monooxygenase terC; AltName: Full=Terrein biosynthesis cluster protein terC && PF01494:FAD binding domain|PF00135:Carboxylesterase family	FAD_binding_3
A03721	4.29708	Contig1	5971469	5972736	+	942	-	-
A05676	4.3365	Contig24	825290	826893	-	1494	Q9UUD8.1 RecName: Full=Uncharacterized peptidase C18A7.01 && PF00557:Metallopeptidase family M24|PF01321:Creatinase/Prolidase N-terminal domain	Peptidase_M24
A06800	4.32888	Contig2	5641998	5643164	+	1167	PF12695:Alpha/beta hydrolase family	-
A14206	-4.75193	Contig9	75037	76299	-	1263	P9WM50.1 RecName: Full=Uncharacterized protein MT1298 >P9WM51.1 RecName: Full=Uncharacterized protein Rv1260 && PF01494:FAD binding domain	FAD_binding_3
A08995	4.29656	Contig3	1295043	1295474	+	432	PF01476:LysM domain	LysM
A09582	4.33393	Contig3	4256513	4261667	-	4329	PF00082:Subtilase family	Peptidase_S8
A13887	4.36052	Contig8	1891484	1894704	+	2841	-	-
A03394	4.33371	Contig19	871511	872630	+	957	O94564.1 RecName: Full=Zinc-type alcohol dehydrogenase-like protein C1773.06c && PF00107:Zinc-binding dehydrogenase|PF08240:Alcohol dehydrogenase GroES-like domain	ADH_zinc_N
A07165	4.29863	Contig2	1975151	1978741	+	1749	-	-
A01140	4.27436	Contig12	211495	213023	+	1134	PF13489:Methyltransferase domain	-
A03877	4.25127	Contig1	779452	781152	-	1701	P14904.2 RecName: Full=Vacuolar aminopeptidase 1; AltName: Full=Aminopeptidase yscI; AltName: Full=Leucine aminopeptidase IV; Short=LAPIV; AltName: Full=Lysosomal aminopeptidase III; AltName: Full=Polypeptidase; AltName: Full=Vacuolar aminopeptidase I; Flags: Precursor && PF02127:Aminopeptidase I zinc metalloprotease (M18)	Peptidase_M18
A00577	4.29395	Contig11	536124	537976	-	1749	-	-
A02805	4.35773	Contig17	968440	969595	+	1077	E9QUT3.1 RecName: Full=Hydroxynaphthalene reductase arp2; AltName: Full=Conidial pigment biosynthesis oxidase arp2 && PF00106:short chain dehydrogenase	adh_short
A03111	4.27958	Contig18	375264	377786	+	2442	PF11559:Afadin- and alpha -actinin-Binding	-
A05966	4.27695	Contig26	313535	314794	+	1110	Q76NT9.1 RecName: Full=1-aminocyclopropane-1-carboxylate oxidase; Short=ACC oxidase; Short=Ddaco; AltName: Full=Ethylene-forming enzyme; Short=EFE >A6BM06.1 RecName: Full=1-aminocyclopropane-1-carboxylate oxidase; Short=ACC oxidase; Short=Dmaco; AltName: Full=Ethylene-forming enzyme; Short=EFE && PF14226:non-haem dioxygenase in morphine synthesis N-terminal|PF03171:2OG-Fe(II) oxygenase superfamily	2OG-FeII_Oxy
A11197	4.28264	Contig52	146876	154624	+	4758	PF06985:Heterokaryon incompatibility protein (HET)|PF00069:Protein kinase domain	Pkinase
A09498	4.27388	Contig3	3797680	3803179	-	5277	-	-
A04821	4.26962	Contig20	178523	183673	-	4335	Q8HXQ5.1 RecName: Full=Multidrug resistance-associated protein 1; AltName: Full=ATP-binding cassette sub-family C member 1; AltName: Full=Leukotriene C(4) transporter; Short=LTC4 transporter && PF00005:ABC transporter|PF00664:ABC transporter transmembrane region	ABC_tran
A13785	4.23557	Contig8	1409826	1411668	+	1617	P08158.1 RecName: Full=Acetamidase && PF01425:Amidase	Amidase
A08917	4.28707	Contig3	938131	939600	+	1470	PF00295:Glycosyl hydrolases family 28	-
A01437	4.39653	Contig13	1243133	1245082	-	1950	PF05686:Glycosyl transferase family 90	-
A09222	4.26857	Contig3	2406836	2407851	+	954	-	-
A13823	4.21756	Contig8	275137	282674	+	4668	Q9RKB5.1 RecName: Full=Baeyer-Villiger monooxygenase; Short=BVMO && PF04082:Fungal specific transcription factor domain|PF13738:Pyridine nucleotide-disulphide oxidoreductase	Fungal_trans
A11229	4.26627	Contig52	254646	255631	-	834	-	-
A04262	4.2022	Contig1	2207107	2209439	-	1947	B7STY2.1 RecName: Full=L-tyrosine:2-oxoglutarate aminotransferase atrD; AltName: Full=Atromentin biosynthesis protein D && -	-
A06348	4.22071	Contig28	566793	567794	+	903	Q54BF3.1 RecName: Full=Fumarylacetoacetate hydrolase domain-containing protein 2 homolog && PF01557:Fumarylacetoacetate (FAA) hydrolase family	FAA_hydrolase
A14005	4.2622	Contig8	2367321	2367820	+	375	PF01722:BolA-like protein	-
A06192	4.30276	Contig27	486126	487698	+	1455	P49374.1 RecName: Full=High-affinity glucose transporter && PF00083:Sugar (and other) transporter	Sugar_tr
A00548	4.2436	Contig11	411558	412334	+	777	P0CL22.1 RecName: Full=Putative triosephosphate isomerase; Short=TIM; AltName: Full=Triose-phosphate isomerase && PF00121:Triosephosphate isomerase	-
A02478	4.26634	Contig16	938458	939338	+	474	P87304.1 RecName: Full=Putative esterase C31F10.02 && PF03061:Thioesterase superfamily	4HBT
A08809	4.23526	Contig3	466608	467495	+	888	P79017.2 RecName: Full=Major allergen Asp f 2; AltName: Full=Allergen Asp f II; AltName: Allergen=Asp f 2; Flags: Precursor && PF13933:Putative peptidase family	-
A08932	4.27301	Contig3	1006554	1007407	+	789	PF12697:Alpha/beta hydrolase family	-
A00254	4.22625	Contig10	1601872	1603080	+	1209	-	-
A00624	4.23042	Contig11	721624	722799	+	1176	Q0IIS3.1 RecName: Full=Epoxide hydrolase 3; AltName: Full=Abhydrolase domain-containing protein 9 && PF00561:alpha/beta hydrolase fold	Abhydrolase_1
A04496	4.23833	Contig1	3108673	3110202	-	1350	-	-
A11590	4.24268	Contig5	646255	647981	-	1569	O74923.1 RecName: Full=Uncharacterized transporter C757.13 && PF07690:Major Facilitator Superfamily	MFS_1
A14106	-5.61488	Contig8	519005	520048	-	1044	-	-
A00964	4.26961	Contig12	1219973	1220970	-	945	PF05368:NmrA-like family	NmrA
A00726	4.34078	Contig11	1170324	1172906	-	2445	B8NM69.1 RecName: Full=Peptidase S41 family protein ustP; AltName: Full=Ustiloxin B biosynthesis protein P && -	-
A13027	4.19657	Contig7	87734	89917	-	2184	Q2GMW8.1 RecName: Full=Plasma membrane fusion protein PRM1 && -	-
novel.179	4.36404	Contig12	705573	706632	+	950	-	-
A06188	4.21951	Contig27	465140	474292	+	5001	-	-
A04768	4.21026	Contig1	4449624	4450202	-	579	PF09424:Yqey-like protein	-
A06911	4.21601	Contig2	969256	970190	+	879	O67071.1 RecName: Full=Uncharacterized protein aq_928 && PF01613:Flavin reductase like domain	Flavin_Reduct
A01609	4.23086	Contig13	280027	281802	+	1554	P40445.1 RecName: Full=Uncharacterized transporter YIL166C && PF07690:Major Facilitator Superfamily	MFS_1
A05130	4.16162	Contig21	707591	709626	-	1827	Q7XJJ7.1 RecName: Full=Fatty acid amide hydrolase; AltName: Full=N-acylethanolamine amidohydrolase && PF01425:Amidase	Amidase
A08051	4.21714	Contig31	256311	257940	-	1518	O62763.1 RecName: Full=Acetylcholinesterase; Short=AChE; Flags: Precursor && PF00135:Carboxylesterase family	COesterase
A00682	4.20027	Contig11	975256	981842	+	3024	PF13383:Methyltransferase domain	-
novel.1065	-5.05432	Contig51	150587	151083	-	269	-	-
A04925	4.36445	Contig20	827224	829223	+	1788	Q8GXR2.2 RecName: Full=Probable polyol transporter 6 && PF00083:Sugar (and other) transporter	Sugar_tr
A11350	4.14123	Contig55	135209	137158	-	1950	-	-
A04420	4.20039	Contig1	2794787	2796668	-	1704	P21623.2 RecName: Full=Spore wall maturation protein DIT1 && PF05141:Pyoverdine/dityrosine biosynthesis protein	-
A14305	4.21967	Contig9	446361	447617	+	1164	Q9UTQ8.1 RecName: Full=Histidine protein methyltransferase 1; AltName: Full=Methyltransferase-like protein 18 homolog C1071.05 && -	-
A14225	4.13943	Contig9	165905	167168	+	1182	PF08790:LYAR-type C2HC zinc finger	-
A05779	4.17969	Contig25	249396	250944	+	1182	Q8BUE4.1 RecName: Full=Apoptosis-inducing factor 2; AltName: Full=Apoptosis-inducing factor homologous mitochondrion-associated inducer of death; AltName: Full=Apoptosis-inducing factor-like mitochondrion-associated inducer of death && PF07992:Pyridine nucleotide-disulphide oxidoreductase	Pyr_redox_2
A10264	4.31819	Contig4	889766	890499	-	567	-	-
A01441	4.25218	Contig13	1258837	1259485	+	597	PF00520:Ion transport protein	Ion_trans
A00700	4.13693	Contig11	1077218	1078262	+	921	Q10494.1 RecName: Full=Uncharacterized oxidoreductase C26F1.07 && PF00248:Aldo/keto reductase family	Aldo_ket_red
A13148	4.19696	Contig7	598808	600271	-	1464	-	-
A09694	4.29009	Contig40	420262	422487	-	1701	Q5SS80.1 RecName: Full=Dehydrogenase/reductase SDR family member 13; AltName: Full=Short chain dehydrogenase/reductase family 7C member 5; Flags: Precursor && PF00106:short chain dehydrogenase|PF01083:Cutinase	adh_short
A05144	4.31396	Contig21	803002	803757	-	705	-	-
A06191	4.31679	Contig27	482126	484931	-	2745	PF05592:Bacterial alpha-L-rhamnosidase|PF08531:Alpha-L-rhamnosidase N-terminal domain	-
A00899	4.18956	Contig12	1002111	1003447	+	1287	PF01753:MYND finger	zf-MYND
A07707	4.18931	Contig2	4204965	4206933	-	1548	Q9US44.1 RecName: Full=Uncharacterized transporter C1002.16c && PF07690:Major Facilitator Superfamily	MFS_1
A10243	4.1759	Contig4	751927	753642	-	1716	P32946.1 RecName: Full=Lipase 2; Flags: Precursor && PF00135:Carboxylesterase family	COesterase
A01496	4.12317	Contig13	1460900	1462139	-	1059	O14169.2 RecName: Full=Phosphatidylglycerol phospholipase C && PF03009:Glycerophosphoryl diester phosphodiesterase family	-
A00370	4.16715	Contig10	309516	310316	+	720	-	-
A12618	4.15174	Contig6	1490446	1492132	+	1581	O74923.1 RecName: Full=Uncharacterized transporter C757.13 && PF07690:Major Facilitator Superfamily	MFS_1
A09301	4.15616	Contig3	2749950	2751569	+	1182	P38680.2 RecName: Full=N amino acid transport system protein; AltName: Full=Methyltryptophan resistance protein && PF01490:Transmembrane amino acid transporter protein	Aa_trans
A00905	4.15245	Contig12	1021255	1023201	-	1842	Q92RP0.1 RecName: Full=Putative dehydratase IlvD1 && PF00920:Dehydratase family	ILVD_EDD
A01152	4.15541	Contig12	254756	257237	+	2433	O46406.1 RecName: Full=Primary amine oxidase, lung isozyme; AltName: Full=Amine oxidase [copper-containing]; AltName: Full=BOLAO; AltName: Full=Copper amine oxidase; Flags: Precursor && PF01179:Copper amine oxidase, enzyme domain|PF02727:Copper amine oxidase, N2 domain|PF09248:Domain of unknown function (DUF1965)	-
A04320	4.18102	Contig1	2460130	2461339	-	996	PF04199:Putative cyclase	-
A12845	4.15187	Contig6	2811956	2813987	-	1578	P08158.1 RecName: Full=Acetamidase && PF01425:Amidase	Amidase
A11685	4.15215	Contig5	999279	999956	-	678	-	-
A00271	4.17231	Contig10	1660626	1662320	-	1395	PF07690:Major Facilitator Superfamily	MFS_1
A03301	4.19967	Contig19	555730	557445	-	1716	Q96WM9.1 RecName: Full=Laccase-2; AltName: Full=Benzenediol:oxygen oxidoreductase 2; AltName: Full=Diphenol oxidase 2; AltName: Full=Urishiol oxidase 2; Flags: Precursor && PF00394:Multicopper oxidase|PF07732:Multicopper oxidase|PF07731:Multicopper oxidase	-
A09340	4.13719	Contig3	2937303	2938620	-	1248	P36605.1 RecName: Full=Histidinol-phosphate aminotransferase; AltName: Full=Imidazole acetol-phosphate transaminase && PF00155:Aminotransferase class I and II	Aminotran_1_2
A12824	4.11452	Contig6	2724053	2728998	-	4842	Q06518.2 RecName: Full=Nitric oxide synthase, inducible; AltName: Full=Inducible NO synthase; Short=Inducible NOS; Short=iNOS; AltName: Full=NOS type II; AltName: Full=Peptidyl-cysteine S-nitrosylase NOS2 && PF00667:FAD binding domain|PF00175:Oxidoreductase NAD-binding domain|PF00173:Cytochrome b5-like Heme/Steroid binding domain|PF01231:Indoleamine 2,3-dioxygenase	NAD_binding_1
A01051	-4.2503	Contig12	1536155	1537297	+	906	PF13460:NAD(P)H-binding	-
A05183	4.15896	Contig21	984091	985940	+	1620	Q44470.1 RecName: Full=Putative tartrate transporter && PF07690:Major Facilitator Superfamily	MFS_1
A06172	4.18552	Contig27	406999	408570	-	1035	PF13489:Methyltransferase domain	-
A02505	4.15159	Contig16	1064163	1065777	+	1515	PF07632:Protein of unknown function (DUF1593)	-
A05165	4.16977	Contig21	895465	898626	+	2964	PF01968:Hydantoinase/oxoprolinase|PF05378:Hydantoinase/oxoprolinase N-terminal region|PF06032:Protein of unknown function (DUF917)	-
A07454	4.07368	Contig2	3113961	3116243	-	1848	Q6BJW6.2 RecName: Full=Invertase; AltName: Full=Beta-fructofuranosidase; AltName: Full=Saccharase; Flags: Precursor && PF00251:Glycosyl hydrolases family 32 N-terminal domain	-
A06775	4.1288	Contig2	566263	568131	+	1869	-	-
A09341	4.16323	Contig3	2940145	2941252	+	1044	A7J2C6.1 RecName: Full=Acetylesterase; AltName: Full=Carbohydrate esterase family 16 protein; Flags: Precursor && PF00657:GDSL-like Lipase/Acylhydrolase	Lipase_GDSL
novel.191	4.11864	Contig12	1613365	1616025	+	2501	Q9UV10.1 RecName: Full=Heterokaryon incompatibility protein 6, OR allele; Short=Het-6(OR) && -	-
A06271	4.16941	Contig28	234078	238261	-	4098	Q9SG02.1 RecName: Full=RNA-dependent RNA polymerase 6; Short=AtRDRP6; AltName: Full=Protein SILENCING DEFECTIVE 1; AltName: Full=Protein SUPPRESSOR OF GENE SILENCING 2; AltName: Full=RNA-directed RNA polymerase 6 && PF05183:RNA dependent RNA polymerase	-
A08285	4.15604	Contig33	205617	206297	-	528	-	-
A10435	4.14213	Contig4	1525463	1528210	+	2346	-	-
A13427	4.15704	Contig7	1962370	1963558	-	948	Q76L37.1 RecName: Full=NADPH-dependent conjugated polyketone reductase C1; Short=CPR; AltName: Full=2-dehydropantolactone reductase (A-specific); AltName: Full=Ketopantoyl-lactone reductase && PF00248:Aldo/keto reductase family	Aldo_ket_red
A04695	4.06322	Contig1	4016669	4019923	+	2988	Q7SAP1.1 RecName: Full=GPI ethanolamine phosphate transferase 1 && PF04987:Phosphatidylinositolglycan class N (PIG-N)|PF01663:Type I phosphodiesterase / nucleotide pyrophosphatase	-
A12789	-5.70191	Contig6	2579124	2582496	+	513	PF05368:NmrA-like family	NmrA
A03399	4.11344	Contig19	883954	885113	-	1104	PF00651:BTB/POZ domain	BTB
A07753	4.16804	Contig2	456522	457187	+	666	PF17107:N-terminal domain on NACHT_NTPase and P-loop NTPases	-
A04185	4.12897	Contig1	1958814	1961038	-	2085	PF01048:Phosphorylase superfamily	-
A04575	4.12199	Contig1	381467	382636	+	1056	-	-
A05182	4.12024	Contig21	981577	983349	-	1497	E9JFX9.1 RecName: Full=Dimethyl-sulfide monooxygenase; AltName: Full=Dimethylsulfide monooxygenase large subunit && PF00296:Luciferase-like monooxygenase	-
A00831	4.16971	Contig11	1842766	1846503	-	1881	M2SNN6.1 RecName: Full=Secondary metabolism regulator LAE1; AltName: Full=Methyltransferase LAE1; AltName: Full=Velvet complex subunit LAE1 && PF13489:Methyltransferase domain	-
A14567	4.26993	Contig9	1456981	1458140	-	1098	D4ALQ5.2 RecName: Full=Probable extracellular glycosidase ARB_05253; Flags: Precursor && PF00722:Glycosyl hydrolases family 16	-
A03567	4.15806	Contig1	5231486	5232543	-	864	Q8NKC1.1 RecName: Full=Probable catechol O-methyltransferase 2 && PF01596:O-methyltransferase	-
A00902	4.15222	Contig12	1014775	1015719	+	888	PF13489:Methyltransferase domain	-
A08936	4.13831	Contig3	1027505	1028308	-	804	O31528.1 RecName: Full=Probable rhamnogalacturonan acetylesterase YesY; Short=RGAE && PF00657:GDSL-like Lipase/Acylhydrolase	Lipase_GDSL
A13126	4.08674	Contig7	517145	519027	+	1725	Q0P4F7.1 RecName: Full=Acyl-CoA synthetase family member 2, mitochondrial; Flags: Precursor && PF13193:AMP-binding enzyme C-terminal domain|PF00501:AMP-binding enzyme	AMP-binding
A10489	4.0715	Contig4	1791909	1794630	-	2277	Q9HDX1.1 RecName: Full=Uncharacterized transcriptional regulatory protein PB1A11.04c && PF04082:Fungal specific transcription factor domain	Fungal_trans
A07803	4.08404	Contig2	4528208	4530005	-	1569	Q12300.1 RecName: Full=High-affinity glucose transporter RGT2 && PF00083:Sugar (and other) transporter	Sugar_tr
A13468	4.07614	Contig7	2123497	2124786	+	999	Q07505.1 RecName: Full=Putative carboxymethylenebutenolidase; AltName: Full=Dienelactone hydrolase; Short=DLH && PF01738:Dienelactone hydrolase family	-
A05747	4.15576	Contig25	93749	98204	+	4386	Q92887.3 RecName: Full=Canalicular multispecific organic anion transporter 1; AltName: Full=ATP-binding cassette sub-family C member 2; AltName: Full=Canalicular multidrug resistance protein; AltName: Full=Multidrug resistance-associated protein 2 && PF00664:ABC transporter transmembrane region|PF00005:ABC transporter	ABC_tran
A03886	4.08612	Contig1	102623	104403	+	1722	D4AYS6.1 RecName: Full=Probable extracellular serine carboxypeptidase; Flags: Precursor && PF05577:Serine carboxypeptidase S28	Peptidase_S28
A12217	4.08149	Contig5	3137177	3138727	-	1392	P36618.1 RecName: Full=Cell division control protein 16 && PF00566:Rab-GTPase-TBC domain	TBC
A05124	4.08937	Contig21	689869	690780	-	855	PF01765:Ribosome recycling factor	-
A02643	4.08591	Contig17	262723	264551	+	1578	P19807.1 RecName: Full=Choline transport protein && PF13520:Amino acid permease	-
A13709	4.07851	Contig8	1026372	1027471	+	1029	PF05630:Necrosis inducing protein (NPP1)	-
A03006	4.06196	Contig18	1074494	1076177	+	1635	Q0CI21.2 RecName: Full=Probable feruloyl esterase B-2; AltName: Full=Ferulic acid esterase B-2; Short=FAEB-2; Flags: Precursor && PF07519:Tannase and feruloyl esterase	-
A14161	4.06847	Contig9	2104179	2105994	+	1758	P81156.1 RecName: Full=Glucose oxidase; AltName: Full=Beta-D-glucose:oxygen 1-oxido-reductase; AltName: Full=Glucose oxyhydrase; Short=GOD && PF00732:GMC oxidoreductase|PF05199:GMC oxidoreductase	-
A04452	4.03651	Contig1	39040	44103	-	5064	-	-
A09772	4.05997	Contig41	352987	357533	-	2904	P05183.2 RecName: Full=Cytochrome P450 3A2; AltName: Full=CYPIIIA2; AltName: Full=Cytochrome P450-PCN2; AltName: Full=Cytochrome P450/6-beta-A; AltName: Full=Testosterone 6-beta-hydroxylase && PF00067:Cytochrome P450	p450
A02201	4.15175	Contig15	770693	771818	-	1065	O94574.3 RecName: Full=Putative 2-hydroxyacid dehydrogenase C1773.17c && PF00389:D-isomer specific 2-hydroxyacid dehydrogenase, catalytic domain|PF02826:D-isomer specific 2-hydroxyacid dehydrogenase, NAD binding domain	2-Hacid_dh_C
A01530	-5.62036	Contig13	1543979	1546594	-	2502	P29141.1 RecName: Full=Minor extracellular protease vpr; Flags: Precursor && PF00082:Subtilase family|PF06280:Fn3-like domain	Peptidase_S8
A11385	4.27205	Contig56	167106	168354	+	1197	Q03420.1 RecName: Full=Alkaline proteinase; Short=ALP; Flags: Precursor && PF00082:Subtilase family|PF05922:Peptidase inhibitor I9	Peptidase_S8
A08966	4.02852	Contig3	1133988	1137276	-	1821	-	-
A00674	4.06348	Contig11	953394	955000	-	1503	Q9US47.2 RecName: Full=Putative succinate-semialdehyde dehydrogenase C1002.12c [NADP(+)]; Short=SSDH && PF00171:Aldehyde dehydrogenase family	Aldedh
novel.1009	4.05815	Contig5	3258455	3260581	+	2081	-	-
A00020	4.02318	Contig10	695242	696075	-	834	-	-
A14292	4.011	Contig9	411576	412189	+	543	Q6MVL2.1 RecName: Full=Deoxyuridine 5'-triphosphate nucleotidohydrolase; Short=dUTPase; AltName: Full=dUTP pyrophosphatase && PF00692:dUTPase	-
A05750	4.07476	Contig25	105370	107894	+	2190	P39992.1 RecName: Full=Uncharacterized protein YEL023C && PF09994:Uncharacterized alpha/beta hydrolase domain (DUF2235)	-
A05590	4.09628	Contig24	525802	528421	+	945	Q9V831.2 RecName: Full=Anaphase-promoting complex subunit 10; Short=APC10; AltName: Full=Cyclosome subunit 10 && PF03256:Anaphase-promoting complex, subunit 10 (APC10)	-
A00913	4.06668	Contig12	1062021	1066806	-	4329	Q9HDX1.1 RecName: Full=Uncharacterized transcriptional regulatory protein PB1A11.04c && PF04082:Fungal specific transcription factor domain|PF05960:Bacterial protein of unknown function (DUF885)	Fungal_trans
A06656	4.17491	Contig2	5036185	5036853	+	669	O43123.1 RecName: Full=Maleylacetoacetate isomerase; Short=MAAI && PF13417:Glutathione S-transferase, N-terminal domain	-
A00923	4.07087	Contig12	1086213	1087523	+	1311	-	-
A13596	4.04068	Contig8	556727	557649	+	873	P0CJ44.1 RecName: Full=Putative fructose-bisphosphate aldolase; Short=FBP aldolase; Short=FBPA; AltName: Full=Putative fructose-1,6-bisphosphate aldolase && PF01116:Fructose-bisphosphate aldolase class-II	F_bP_aldolase
A09087	4.08337	Contig3	1692648	1693237	-	522	Q9ERY9.1 RecName: Full=Probable ergosterol biosynthetic protein 28 && PF03694:Erg28 like protein	-
A00174	4.03456	Contig10	1344445	1345929	-	1485	E9JFX9.1 RecName: Full=Dimethyl-sulfide monooxygenase; AltName: Full=Dimethylsulfide monooxygenase large subunit && PF00296:Luciferase-like monooxygenase	-
A10602	4.0222	Contig4	2357890	2360445	-	1731	P29139.1 RecName: Full=Intracellular serine protease && PF00082:Subtilase family	Peptidase_S8
A07990	4.03664	Contig31	67115	68064	-	750	-	-
A04518	4.01271	Contig1	3178726	3179649	+	924	PF00244:14-3-3 protein	-
A07543	4.02461	Contig2	3563253	3564500	+	1248	-	-
A06869	4.03449	Contig2	5941055	5943222	-	2082	P12807.1 RecName: Full=Peroxisomal primary amine oxidase; AltName: Full=Copper amine oxidase; AltName: Full=Methylamine oxidase && PF02728:Copper amine oxidase, N3 domain|PF02727:Copper amine oxidase, N2 domain|PF01179:Copper amine oxidase, enzyme domain	-
A05155	4.01224	Contig21	850198	852071	+	1668	Q9HE13.1 RecName: Full=Uncharacterized MFS-type transporter C1399.02 && PF07690:Major Facilitator Superfamily	MFS_1
A09339	4.0848	Contig3	2933071	2934764	-	1560	Q6FLP9.1 RecName: Full=Mannan endo-1,6-alpha-mannosidase DCW1; AltName: Full=Defective cell wall 1; AltName: Full=Endo-alpha-1->6-D-mannanase DCW1; Flags: Precursor && PF03663:Glycosyl hydrolase family 76	-
A10272	4.04956	Contig4	916882	918517	-	1542	Q9UT46.4 RecName: Full=Transcriptional regulatory protein moc3; AltName: Full=Multicopy suppressor of overexpressed cyr1 protein 3 && PF00172:Fungal Zn(2)-Cys(6) binuclear cluster domain	Zn_clus
A11714	4.04407	Contig5	1095450	1096548	-	1029	-	-
A09538	4.02938	Contig3	3999430	4001275	+	1473	O74713.1 RecName: Full=High-affinity glucose transporter && PF00083:Sugar (and other) transporter	Sugar_tr
A12963	4.0042	Contig6	446117	446989	+	873	B8M9H9.1 RecName: Full=Feruloyl esterase B; AltName: Full=Ferulic acid esterase B; Short=FAE; Flags: Precursor && PF10503:Esterase PHB depolymerase	-
A13567	4.02515	Contig7	2608434	2609524	+	864	Q96WY0.2 RecName: Full=GTP-binding protein rhoC; AltName: Full=Rho3 protein homolog; Flags: Precursor && PF00071:Ras family	Ras
A00916	4.02809	Contig12	1070888	1071442	-	501	-	-
A13730	-4.37454	Contig8	1091441	1096320	+	4287	G3XMD1.1 RecName: Full=Highly reducing polyketide synthase azaB; Short=HR-PKS azaB; AltName: Full=Azaphilone biosynthesis cluster protein azaB && PF14765:Polyketide synthase dehydratase|PF02801:Beta-ketoacyl synthase, C-terminal domain|PF00109:Beta-ketoacyl synthase, N-terminal domain|PF00698:Acyl transferase domain|PF16197:Ketoacyl-synthetase C-terminal extension|PF08242:Methyltransferase domain	ketoacyl-synt
novel.611	4.00308	Contig26	197466	197950	-	426	-	-
A07095	4.00753	Contig2	1681290	1683134	+	1845	-	-
A06244	4.00557	Contig28	104418	105668	-	1251	Q12303.1 RecName: Full=Aspartic proteinase yapsin-3; Flags: Precursor && PF00026:Eukaryotic aspartyl protease	Asp
A13125	4.00894	Contig7	506831	512706	-	5805	Q4WF53.1 RecName: Full=Nonribosomal peptide synthetase 4; AltName: Full=Siderophore peptide synthase D && PF00668:Condensation domain|PF00550:Phosphopantetheine attachment site|PF00501:AMP-binding enzyme	AMP-binding
A04982	4.02345	Contig21	44807	47366	-	2403	PF00004:ATPase family associated with various cellular activities (AAA)	AAA
A06468	4.02894	Contig29	316838	318170	-	1167	Q9YAW4.2 RecName: Full=Glyoxylate reductase && PF00389:D-isomer specific 2-hydroxyacid dehydrogenase, catalytic domain|PF02826:D-isomer specific 2-hydroxyacid dehydrogenase, NAD binding domain	2-Hacid_dh_C
A13672	4.03301	Contig8	830391	834775	+	2397	P54839.1 RecName: Full=Hydroxymethylglutaryl-CoA synthase; Short=HMG-CoA synthase; AltName: Full=3-hydroxy-3-methylglutaryl coenzyme A synthase && PF01154:Hydroxymethylglutaryl-coenzyme A synthase N terminal|PF08540:Hydroxymethylglutaryl-coenzyme A synthase C terminal	-
A02255	4.05383	Contig15	937164	940268	-	1920	O74524.1 RecName: Full=Probable proline dehydrogenase, mitochondrial; AltName: Full=Probable proline oxidase; Flags: Precursor && PF13417:Glutathione S-transferase, N-terminal domain|PF13410:Glutathione S-transferase, C-terminal domain|PF01619:Proline dehydrogenase	-
A00721	4.00191	Contig11	1149627	1150694	-	1068	-	-
A08991	4.05649	Contig3	1282828	1284105	+	1137	O14094.1 RecName: Full=Putative exopolyphosphatase; Short=ExopolyPase; AltName: Full=Metaphosphatase && PF01368:DHH family|PF02833:DHHA2 domain	-
A05167	4.03002	Contig21	902935	904590	+	1656	A6WYU9.1 RecName: Full=Imidazolonepropionase; AltName: Full=Imidazolone-5-propionate hydrolase && PF07969:Amidohydrolase family	-
A11441	4.05953	Contig58	7027	7566	-	486	Q9P403.1 RecName: Full=Intracellular hyphae protein 1; Flags: Precursor && PF01476:LysM domain	LysM
A03034	4.05829	Contig18	1152907	1153614	-	708	-	-
A01939	4.0159	Contig14	1406041	1407729	+	1632	B6V866.1 RecName: Full=Carboxypeptidase 2; AltName: Full=Carboxypeptidase M14B; AltName: Full=Carboxypeptidase MCPB; Flags: Precursor [Trichophyton tonsurans] && PF00246:Zinc carboxypeptidase	-
A01682	4.07352	Contig14	154262	156513	-	1974	G4NI45.1 RecName: Full=Beta-glucosidase cel3A; AltName: Full=Beta-D-glucoside glucohydrolase cel3A; AltName: Full=Cellobiase cel3A; AltName: Full=Gentiobiase cel3A; Flags: Precursor && PF14310:Fibronectin type III-like domain|PF00933:Glycosyl hydrolase family 3 N terminal domain|PF01915:Glycosyl hydrolase family 3 C-terminal domain	Glyco_hydro_3_C
A09724	4.01119	Contig41	154560	156955	-	366	-	-
A02299	4.03083	Contig15	1177550	1183360	-	2178	P53241.1 RecName: Full=Vitamin H transporter; AltName: Full=H(+)/biotin symporter && PF07690:Major Facilitator Superfamily	MFS_1
A01073	4.04548	Contig12	1646616	1648182	-	1326	A9YWT8.1 RecName: Full=Protease PrtS; Flags: Precursor && PF01447:Thermolysin metallopeptidase, catalytic domain|PF16485:Protealysin propeptide|PF02868:Thermolysin metallopeptidase, alpha-helical domain	-
A01531	4.00745	Contig13	1547434	1550458	-	2526	PF17111:Fungal N-terminal domain of STAND proteins	-
novel.70	4.05188	Contig1	87263	88848	-	1523	-	-
A11713	4.02207	Contig5	1092841	1094806	+	1737	-	-
A05832	4.02652	Contig25	601502	602705	+	1059	P0A3U6.1 RecName: Full=Protein Atu3128 >P0A3U7.1 RecName: Full=24.9 kDa protein in picA locus; AltName: Full=ORF1 && PF07470:Glycosyl Hydrolase Family 88	-
novel.502	-7.46032	Contig20	658258	658620	+	311	-	-
A08324	-7.46032	Contig33	303715	304041	-	327	-	-
A10254	4.10226	Contig4	857071	857799	-	729	PF00293:NUDIX domain	NUDIX
A14221	4.06004	Contig9	135402	136534	-	1071	PF04479:RTA1 like protein	RTA1
A03734	4.01307	Contig1	6021652	6023487	+	1533	Q9HFE4.1 RecName: Full=Thiol-specific monooxygenase; AltName: Full=Flavin-dependent monooxygenase && PF00743:Flavin-binding monooxygenase-like	FMO-like
A11331	-5.04156	Contig55	90018	91873	-	1803	PF13450:NAD(P)-binding Rossmann-like domain	-
novel.824	-4.40076	Contig4	1478787	1479470	+	684	-	-
A07047	-5.11215	Contig2	1489955	1491765	+	1644	P25370.1 RecName: Full=Good for full DBP5 activity protein 2 && -	-
A09872	4.02365	Contig42	323336	325630	+	1701	-	-
novel.442	-4.7141	Contig2	4838606	4839255	+	550	-	-
A05898	-5.07969	Contig26	59140	59932	-	747	PF01753:MYND finger	zf-MYND
A00678	-5.99457	Contig11	962821	963234	-	414	-	-
A08146	-5.99457	Contig32	187513	189411	+	1785	Q9UA35.1 RecName: Full=Solute carrier family 28 member 3; AltName: Full=Concentrative Na(+)-nucleoside cotransporter 3; AltName: Full=hfCNT && PF01773:Na+ dependent nucleoside transporter N-terminus|PF07662:Na+ dependent nucleoside transporter C-terminus	-
A08506	-5.93987	Contig34	538069	539293	-	1179	B8M9J9.1 RecName: Full=3-methylorcinaldehyde synthase tropA; Short=MOS; AltName: Full=Non-reducing polyketide synthase tropA; AltName: Full=Tropolone synthesis protein A && PF08242:Methyltransferase domain	Methyltransf_12
A00209	-5.93985	Contig10	1454899	1456048	-	933	PF01370:NAD dependent epimerase/dehydratase family	Epimerase
A10693	-5.71583	Contig4	2769161	2769493	+	333	-	-
A06305	-5.12552	Contig28	427173	428246	+	1074	P47173.1 RecName: Full=Uncharacterized protein YJR142W && -	-
A07113	-5.11613	Contig2	1732412	1734589	-	2178	-	-
novel.424	-5.08678	Contig2	2902653	2902873	+	221	-	-
A09675	-7.00096	Contig40	303785	305611	+	1776	Q9LMA1.1 RecName: Full=Probable flavin-containing monooxygenase 1 && PF13738:Pyridine nucleotide-disulphide oxidoreductase	-
novel.990	-7.00096	Contig5	1844512	1845552	+	936	-	-
A08464	-7.00096	Contig34	388332	388741	-	336	-	-
novel.1217	-7.00096	Contig8	89863	90159	+	236	PF00067:Cytochrome P450	p450
A08325	-7.00096	Contig33	304109	304748	-	504	PF09362:Domain of unknown function (DUF1996)	-
A03186	-7.29101	Contig19	137816	138936	-	966	Q9SEV0.2 RecName: Full=Anthocyanidin reductase; Short=AtANR; AltName: Full=Anthocyanin spotted testa; Short=ast; AltName: Full=Protein BANYULS && PF01073:3-beta hydroxysteroid dehydrogenase/isomerase family	-
novel.1037	-5.04455	Contig5	2390432	2390724	-	216	-	-
novel.162	-6.96059	Contig11	91406	91692	-	206	-	-
A02065	-6.96059	Contig15	182917	184186	+	1140	B8N8Q9.1 RecName: Full=NADPH dehydrogenase afvA; AltName: Full=Aflavarin synthesis protein A && PF00724:NADH:flavin oxidoreductase / NADH oxidase family	Oxidored_FMN
A05837	-4.35229	Contig25	610699	611936	-	1182	Q8MXL9.2 RecName: Full=PA-phosphatase related-family protein DDB_G0275547 && PF01569:PAP2 superfamily	-
A08980	-6.88202	Contig3	1184754	1188489	-	3216	Q4PGG5.1 RecName: Full=DNA repair protein RAD5 && PF00271:Helicase conserved C-terminal domain|PF00176:SNF2 family N-terminal domain|PF14634:zinc-RING finger domain	SNF2_N
novel.239	-6.88202	Contig13	1172155	1172377	+	223	-	-
A00981	-8.49543	Contig12	1260721	1261530	-	810	P47818.1 RecName: Full=Protein CCC1; AltName: Full=Cross-complementer of CSG1 protein 1 && PF01988:VIT family	DUF125
novel.35	-4.64575	Contig1	2876000	2876222	+	223	-	-
A01990	-8.70896	Contig14	1547659	1549237	-	1527	B6GX22.1 RecName: Full=Mutanase Pc12g07500; AltName: Full=Endo-1,3-alpha-glucanase Pc12g07500; AltName: Full=Glucan endo-1,3-alpha-glucosidas Pc12g07500; Flags: Precursor && PF03659:Glycosyl hydrolase family 71	-
A12757	-4.11115	Contig6	2293377	2294762	+	1386	Q5RE60.1 RecName: Full=Amine oxidase [flavin-containing] A; AltName: Full=Monoamine oxidase type A; Short=MAO-A && PF01593:Flavin containing amine oxidoreductase	Amino_oxidase
A06214	-4.61201	Contig27	637220	638190	+	912	-	-
A05395	-4.51929	Contig22	113664	117021	-	1506	-	-
A12613	-4.08857	Contig6	1477133	1478458	+	1326	P40896.1 RecName: Full=Uncharacterized protein YJL213W && PF01979:Amidohydrolase family	Amidohydro_1
A03999	-4.08145	Contig1	1258292	1258876	+	585	PF00293:NUDIX domain	NUDIX
A01575	-5.1288	Contig13	1798497	1800178	+	1551	PF07690:Major Facilitator Superfamily	MFS_1
A05608	-5.13663	Contig24	586289	588235	+	1656	PF04082:Fungal specific transcription factor domain	Fungal_trans
A02569	-5.10443	Contig16	1259468	1260583	+	1116	G3XMC6.1 RecName: Full=Dehydrogenase azaJ; AltName: Full=Azaphilone biosynthesis cluster protein azaJ && PF00107:Zinc-binding dehydrogenase|PF08240:Alcohol dehydrogenase GroES-like domain	ADH_zinc_N
A14343	-5.06699	Contig9	568470	569003	-	423	-	-
novel.1214	-4.09191	Contig7	2430030	2430550	-	353	-	-
A02541	-5.08992	Contig16	1191179	1191622	-	444	-	-
A11377	-5.08992	Contig56	102724	103631	+	798	-	-
A10530	-4.12125	Contig4	2024148	2025077	-	930	PF00704:Glycosyl hydrolases family 18	-
A05761	-5.08992	Contig25	179411	184993	-	1353	Q88FY2.1 RecName: Full=6-hydroxynicotinate 3-monooxygenase; Short=6HNA monooxygenase; AltName: Full=Nicotinate degradation protein C; Flags: Precursor && PF01494:FAD binding domain	FAD_binding_3
A00245	-5.08992	Contig10	1584618	1586525	+	1746	D4B1N9.1 RecName: Full=Probable secreted lipase ARB_02369; Flags: Precursor && PF00135:Carboxylesterase family	COesterase
novel.159	-4.20713	Contig11	751945	752257	+	257	-	-
A07796	-4.55476	Contig2	4513059	4513937	+	879	PF03372:Endonuclease/Exonuclease/phosphatase family	Exo_endo_phos
novel.1064	-4.55476	Contig51	150073	150462	-	286	-	-
A11639	-4.20783	Contig5	836185	837425	+	798	-	-
A05875	-4.18197	Contig25	763573	764241	+	669	-	-
